# Supplementary material
Source: publisher figshare collection journal article supplement (https://gsajournals.figshare.com/ndownloader/files/21211539)
Supplement: Supplementary file 1 [file 21211539]

## Sheet: Sheet1
Cluster 1 Molecular function (MF)									Cluster 1 Biological process (BP)									Cluster 1 Cellular component (CC)
	GOMFID	Pvalue	OddsRatio	ExpCount	Count	Size	Term			GOBPID	Pvalue	OddsRatio	ExpCount	Count	Size	Term			GOCCID	Pvalue	OddsRatio	ExpCount	Count	Size	Term
1	GO:0003676	2.97e-24	3.99789	60.8955	133	4789	nucleic acid binding		1	GO:0044265	4.69e-21	15.3283	2.3976	27	195	cellular macromolecule catabolic process		1	GO:0000786	1.81e-36	20.8993	3.99249	45	296	nucleosome
2	GO:0003677	5.95e-22	4.28777	29.1571	86	2293	DNA binding		2	GO:0009057	2.48e-17	10.5347	3.31976	27	270	macromolecule catabolic process		2	GO:0032993	1.81e-36	20.8993	3.99249	45	296	protein-DNA complex
3	GO:1901363	3.06e-17	3.17493	85.9582	148	6760	heterocyclic compound binding		3	GO:0019941	7.57e-17	18.6909	1.36479	19	111	modification-dependent protein catabolic process		3	GO:0044815	2.88e-36	20.6448	4.03296	45	299	DNA packaging complex
4	GO:0097159	3.2e-17	3.17261	85.9964	148	6763	organic cyclic compound binding		4	GO:0006511	7.57e-17	18.6909	1.36479	19	111	ubiquitin-dependent protein catabolic process		4	GO:0000785	1.33e-34	18.6681	4.38365	45	325	chromatin
5	GO:0005488	3.21e-15	4.36502	152.461	202	11990	binding		5	GO:0043632	7.57e-17	18.6909	1.36479	19	111	modification-dependent macromolecule catabolic process		5	GO:0044427	4.14e-25	10.1583	7.60732	46	564	chromosomal part
6	GO:0070001	2.35e-12	10.5398	2.04723	18	161	aspartic-type peptidase activity		6	GO:0044257	8.84e-16	16.0518	1.54922	19	126	cellular protein catabolic process		6	GO:0005694	7.3e-24	9.40036	8.13336	46	603	chromosome
7	GO:0004190	2.35e-12	10.5398	2.04723	18	161	aspartic-type endopeptidase activity		7	GO:0051603	8.84e-16	16.0518	1.54922	19	126	proteolysis involved in cellular protein catabolic process		7	GO:0044446	6.84e-19	5.49973	26.6931	71	1979	intracellular organelle part
8	GO:0051032	3.19e-12	55.961	0.279746	9	22	nucleic acid transmembrane transporter activity		8	GO:0030163	6.57e-15	14.179	1.72136	19	140	protein catabolic process		8	GO:0044422	1.4e-18	5.41136	27.0168	71	2003	organelle part
9	GO:0051033	3.19e-12	55.961	0.279746	9	22	RNA transmembrane transporter activity		9	GO:0044260	2.14e-13	3.26734	58.5507	104	4762	cellular macromolecule metabolic process		9	GO:0043232	2.03e-15	5.00367	16.7658	52	1243	intracellular non-membrane-bounded organelle
10	GO:0022884	4.14e-11	38.2759	0.35604	9	28	macromolecule transmembrane transporter activity		10	GO:0016485	2.46e-13	12.406	1.81972	18	148	protein processing		10	GO:0043228	5.4e-15	4.86511	17.1569	52	1272	non-membrane-bounded organelle
11	GO:0015932	1.18e-08	17.7151	0.635786	9	50	nucleobase-containing compound transmembrane transporter activity		11	GO:1901575	5.07e-13	6.7365	4.95504	27	403	organic substance catabolic process		11	GO:0005666	1.08e-14	59.2026	0.350692	11	26	DNA-directed RNA polymerase III complex
12	GO:0046914	1.86e-08	2.40178	34.218	67	2691	transition metal ion binding		12	GO:0044248	7.15e-13	5.92292	6.29524	30	512	cellular catabolic process		12	GO:0043229	1.57e-12	4.25871	53.1838	90	3943	intracellular organelle
13	GO:0008270	3.31e-08	2.48754	27.9746	58	2200	zinc ion binding		13	GO:0033227	2.22e-12	58.8691	0.270499	9	22	dsRNA transport		13	GO:0043226	5.45e-12	4.11651	54.1414	90	4014	organelle
14	GO:0003899	5.27e-07	7.02579	1.92007	12	151	DNA-directed 5'-3' RNA polymerase activity		14	GO:0051604	4.38e-12	8.21884	3.11074	21	253	protein maturation		14	GO:0032991	7.74e-12	3.66334	34.759	70	2577	macromolecular complex
15	GO:0097747	2.11e-06	6.09623	2.1871	12	172	RNA polymerase activity		15	GO:0044237	8.1e-12	3.08844	70.5633	113	5739	cellular metabolic process		15	GO:0000428	9.59e-12	7.25982	4.08691	23	303	DNA-directed RNA polymerase complex
16	GO:0034062	2.11e-06	6.09623	2.1871	12	172	5'-3' RNA polymerase activity		16	GO:0006383	8.17e-12	26.2839	0.577884	11	47	transcription from RNA polymerase III promoter		16	GO:0055029	9.59e-12	7.25982	4.08691	23	303	nuclear DNA-directed RNA polymerase complex
17	GO:0016779	7.91e-05	3.86346	3.63669	13	286	nucleotidyltransferase activity		17	GO:0009056	7.17e-11	4.83945	7.56167	30	615	catabolic process		17	GO:0005654	1.13e-11	5.33694	7.75569	31	575	nucleoplasm
18	GO:0046872	8.78e-05	1.79057	44.1617	68	3473	metal ion binding		18	GO:0006139	8.52e-11	2.83864	45.3208	84	3686	nucleobase-containing compound metabolic process		18	GO:0044451	1.13e-11	5.33694	7.75569	31	575	nucleoplasm part
19	GO:0043169	0.00011603	1.77048	44.5559	68	3504	cation binding		19	GO:0090304	2.82e-10	2.77788	42.038	79	3419	nucleic acid metabolic process		19	GO:0030880	1.87e-11	7.00086	4.22179	23	313	RNA polymerase complex
20	GO:0045300	0.00016098	Inf	0.0254314	2	2	acyl-[acyl-carrier-protein] desaturase activity		20	GO:0046483	3.03e-10	2.74667	46.3782	84	3772	heterocycle metabolic process		20	GO:0061695	7.91e-11	6.46805	4.53202	23	336	transferase complex, transferring phosphorus-containing groups
21	GO:0004615	0.00016098	Inf	0.0254314	2	2	phosphomannomutase activity		21	GO:0006725	3.56e-10	2.73522	46.5135	84	3783	cellular aromatic compound metabolic process		21	GO:0044424	1.09e-10	4.00146	61.1688	94	4535	intracellular part
22	GO:0016717	0.00094971	78.3333	0.0508629	2	4	oxidoreductase activity, acting on paired donors, with oxidation of a pair of donors resulting in the reduction of molecular oxygen to two molecules of water		22	GO:0009987	8.68e-10	3.11321	95.1664	131	7740	cellular process		22	GO:0070013	2.17e-10	4.29234	10.9659	35	813	intracellular organelle lumen
23	GO:0042802	0.00818048	3.62651	1.74205	6	137	identical protein binding		23	GO:0010467	1.19e-09	2.71436	38.2141	73	3108	gene expression		23	GO:0043233	2.17e-10	4.29234	10.9659	35	813	organelle lumen
24	GO:0005487	0.00820881	17.4004	0.139873	2	11	nucleocytoplasmic transporter activity		24	GO:1901360	1.71e-09	2.62235	47.8906	84	3895	organic cyclic compound metabolic process		24	GO:0031974	2.17e-10	4.29234	10.9659	35	813	membrane-enclosed lumen
25	GO:0016868	0.00820881	17.4004	0.139873	2	11	intramolecular transferase activity, phosphotransferases		25	GO:0034654	2.31e-09	2.91291	24.7629	55	2014	nucleobase-containing compound biosynthetic process		25	GO:0044428	5.12e-10	3.93646	13.1509	38	975	nuclear part
26	GO:0061608	0.00820881	17.4004	0.139873	2	11	nuclear import signal receptor activity		26	GO:0006351	2.45e-09	2.97577	22.6481	52	1842	transcription, DNA-templated		26	GO:0005622	8.77e-10	3.75135	62.9897	94	4670	intracellular
27	GO:0043167	0.0111421	1.39028	69.5422	86	5469	ion binding		27	GO:0097659	2.45e-09	2.97577	22.6481	52	1842	nucleic acid-templated transcription		27	GO:0031981	1.16e-09	4.1533	10.4668	33	776	nuclear lumen
28	GO:0000150	0.0114487	14.2351	0.165304	2	13	recombinase activity		28	GO:0032774	3.2e-09	2.94894	22.8203	52	1856	RNA biosynthetic process		28	GO:0005669	4.9e-09	11.5492	1.29486	12	96	transcription factor TFIID complex
29	GO:0030151	0.0132458	13.048	0.17802	2	14	molybdenum ion binding		29	GO:0019438	8.65e-09	2.78781	25.6728	55	2088	aromatic compound biosynthetic process		29	GO:1990234	1.08e-08	4.42408	7.37802	26	547	transferase complex
30	GO:0004803	0.0174584	4.25504	0.991826	4	78	transposase activity		30	GO:0018130	1.05e-08	2.76999	25.808	55	2099	heterocycle biosynthetic process		30	GO:0005623	3.61e-08	3.30901	66.4966	94	4930	cell
31	GO:0042979	0.0252704	77.9865	0.0254314	1	2	ornithine decarboxylase regulator activity		31	GO:0034641	1.29e-08	2.47309	51.5792	86	4195	cellular nitrogen compound metabolic process		31	GO:0044464	3.61e-08	3.30901	66.4966	94	4930	cell part
32	GO:0008073	0.0252704	77.9865	0.0254314	1	2	ornithine decarboxylase inhibitor activity		32	GO:0050657	2.78e-08	15.9002	0.700838	9	57	nucleic acid transport		32	GO:0005634	8.07e-07	2.5301	34.9883	60	2594	nucleus
33	GO:0008013	0.0252704	77.9865	0.0254314	1	2	beta-catenin binding		33	GO:0050658	2.78e-08	15.9002	0.700838	9	57	RNA transport		33	GO:0071821	1.58e-06	11.5708	0.836266	8	62	FANCM-MHF complex
34	GO:0042803	0.0278337	3.65877	1.14441	4	90	protein homodimerization activity		34	GO:0051236	2.78e-08	15.9002	0.700838	9	57	establishment of RNA localization		34	GO:1902494	5.37e-06	3.09703	10.1296	26	751	catalytic complex
35	GO:0004127	0.0314632	7.82523	0.279746	2	22	cytidylate kinase activity		35	GO:0006403	2.78e-08	15.9002	0.700838	9	57	RNA localization		35	GO:0043231	2.13e-05	2.20122	43.0002	65	3188	intracellular membrane-bounded organelle
36	GO:0005215	0.0343184	1.50147	19.5695	28	1539	transporter activity		36	GO:0043170	3.05e-08	2.49769	78.8996	113	6417	macromolecule metabolic process		36	GO:0043227	5.52e-05	2.10845	44.1467	65	3273	membrane-bounded organelle
37	GO:0016866	0.0490017	6.01733	0.35604	2	28	intramolecular transferase activity		37	GO:0006807	5.21e-08	2.37032	56.6818	90	4610	nitrogen compound metabolic process		37	GO:0090575	0.00017649	3.86692	3.47994	12	258	RNA polymerase II transcription factor complex
									38	GO:1901362	7.03e-08	2.5931	27.2343	55	2215	organic cyclic compound biosynthetic process		38	GO:0044798	0.00018299	3.85079	3.49343	12	259	nuclear transcription factor complex
									39	GO:0016070	8.37e-08	2.49441	32.0541	61	2607	RNA metabolic process		39	GO:0005667	0.00021862	3.77208	3.56087	12	264	transcription factor complex
									40	GO:0006270	1.11e-07	7.43911	2.01645	13	164	DNA replication initiation		40	GO:0016591	0.00034014	3.58132	3.73622	12	277	DNA-directed RNA polymerase II, holoenzyme
									41	GO:0000184	1.22e-07	22.5714	0.405748	7	33	nuclear-transcribed mRNA catabolic process, nonsense-mediated decay		41	GO:0005763	0.00916162	16.5231	0.14837	2	11	mitochondrial small ribosomal subunit
									42	GO:0006352	1.65e-07	4.52926	5.078	20	413	DNA-templated transcription, initiation		42	GO:0015935	0.00916162	16.5231	0.14837	2	11	small ribosomal subunit
									43	GO:0044238	1.89e-07	2.44081	88.6129	120	7207	primary metabolic process		43	GO:0000314	0.00916162	16.5231	0.14837	2	11	organellar small ribosomal subunit
									44	GO:0034645	2.16e-07	2.40375	33.6894	62	2740	cellular macromolecule biosynthetic process		44	GO:0044391	0.0239692	9.2865	0.242787	2	18	ribosomal subunit
									45	GO:0006261	2.71e-07	6.84242	2.17629	13	177	DNA-dependent DNA replication		45	GO:0005761	0.0320495	7.81742	0.283251	2	21	mitochondrial ribosome
									46	GO:0009059	2.79e-07	2.38236	33.923	62	2759	macromolecule biosynthetic process		46	GO:0000313	0.0320495	7.81742	0.283251	2	21	organellar ribosome
									47	GO:0000956	2.81e-07	19.5558	0.45493	7	37	nuclear-transcribed mRNA catabolic process		47	GO:0005759	0.0442217	6.45479	0.337204	2	25	mitochondrial matrix
									48	GO:0015931	9.5e-07	10.0203	1.04511	9	85	nucleobase-containing compound transport		48	GO:0033176	0.0471976	2.66602	1.96927	5	146	proton-transporting V-type ATPase complex
									49	GO:0044271	1.87e-06	2.27252	31.6484	57	2574	cellular nitrogen compound biosynthetic process
									50	GO:0044249	2.48e-06	2.1719	39.419	66	3206	cellular biosynthetic process
									51	GO:0006402	5.88e-06	11.7152	0.700838	7	57	mRNA catabolic process
									52	GO:0071704	6.87e-06	2.1743	94.4041	121	7678	organic substance metabolic process
									53	GO:0006401	8.33e-06	11.0495	0.737724	7	60	RNA catabolic process
									54	GO:0034655	9.46e-06	8.73274	1.04511	8	85	nucleobase-containing compound catabolic process
									55	GO:1901576	1.35e-05	2.0367	41.3248	66	3361	organic substance biosynthetic process
									56	GO:0017038	1.91e-05	6.7198	1.50004	9	122	protein import
									57	GO:0006508	2.67e-05	2.30171	19.3038	38	1570	proteolysis
									58	GO:0046700	3.61e-05	7.1439	1.25413	8	102	heterocycle catabolic process
									59	GO:0044270	3.88e-05	7.06814	1.26643	8	103	cellular nitrogen compound catabolic process
									60	GO:1901361	5.82e-05	6.64513	1.3402	8	109	organic cyclic compound catabolic process
									61	GO:0009058	5.9e-05	1.91821	43.1568	66	3510	biosynthetic process
									62	GO:0019439	7.52e-05	6.38997	1.38938	8	113	aromatic compound catabolic process
									63	GO:0009399	0.00015024	Inf	0.0245908	2	2	nitrogen fixation
									64	GO:0009298	0.00015024	Inf	0.0245908	2	2	GDP-mannose biosynthetic process
									65	GO:0009225	0.00015024	Inf	0.0245908	2	2	nucleotide-sugar metabolic process
									66	GO:0009226	0.00015024	Inf	0.0245908	2	2	nucleotide-sugar biosynthetic process
									67	GO:0019673	0.00015024	Inf	0.0245908	2	2	GDP-mannose metabolic process
									68	GO:0071705	0.00016833	2.59836	9.40598	22	765	nitrogen compound transport
									69	GO:0010605	0.0001704	5.63202	1.56152	8	127	negative regulation of macromolecule metabolic process
									70	GO:0009892	0.000211	5.44715	1.6107	8	131	negative regulation of metabolic process
									71	GO:0006259	0.00022316	2.28458	13.7708	28	1120	DNA metabolic process
									72	GO:0080134	0.00026646	14.9545	0.31968	4	26	regulation of response to stress
									73	GO:0010629	0.00030922	5.95472	1.29102	7	105	negative regulation of gene expression
									74	GO:1901031	0.00036992	27.2696	0.147545	3	12	regulation of response to reactive oxygen species
									75	GO:1902882	0.00036992	27.2696	0.147545	3	12	regulation of response to oxidative stress
									76	GO:0000302	0.00036992	27.2696	0.147545	3	12	response to reactive oxygen species
									77	GO:0008380	0.00056609	5.34916	1.42627	7	116	RNA splicing
									78	GO:0033036	0.0005935	2.35164	10.3035	22	838	macromolecule localization
									79	GO:0006260	0.00064768	2.9548	5.13948	14	418	DNA replication
									80	GO:0006811	0.00071561	2.19738	12.5905	25	1024	ion transport
									81	GO:0019222	0.00076919	1.98462	18.7013	33	1521	regulation of metabolic process
									82	GO:0071702	0.00080435	2.25118	11.2503	23	915	organic substance transport
									83	GO:0044765	0.00107216	2.33173	9.36909	20	762	single-organism transport
									84	GO:0060255	0.00110118	1.95539	18.3078	32	1489	regulation of macromolecule metabolic process
									85	GO:0010468	0.00135775	1.94561	17.7546	31	1444	regulation of gene expression
									86	GO:1902578	0.00137831	2.27949	9.56582	20	778	single-organism localization
									87	GO:0000160	0.00142521	9.12892	0.491816	4	40	phosphorelay signal transduction system
									88	GO:0051293	0.00146627	54.2194	0.061477	2	5	establishment of spindle localization
									89	GO:0040001	0.00146627	54.2194	0.061477	2	5	establishment of mitotic spindle localization
									90	GO:0051653	0.00146627	54.2194	0.061477	2	5	spindle localization
									91	GO:0051656	0.00146627	54.2194	0.061477	2	5	establishment of organelle localization
									92	GO:0016071	0.00162074	3.29359	3.25828	10	265	mRNA metabolic process
									93	GO:0008152	0.00184065	1.7858	113.511	130	9232	metabolic process
									94	GO:0006979	0.00206185	13.6253	0.258203	3	21	response to oxidative stress
									95	GO:0000281	0.00302969	32.5266	0.0860678	2	7	mitotic cytokinesis
									96	GO:0061640	0.00302969	32.5266	0.0860678	2	7	cytoskeleton-dependent cytokinesis
									97	GO:1901700	0.00343963	11.1445	0.307385	3	25	response to oxygen-containing compound
									98	GO:0071941	0.00914517	16.257	0.147545	2	12	nitrogen cycle metabolic process
									99	GO:0048519	0.00965434	2.8632	2.9509	8	240	negative regulation of biological process
									100	GO:0007623	0.0107213	14.7779	0.15984	2	13	circadian rhythm
									101	GO:0048511	0.0142023	12.5024	0.184431	2	15	rhythmic process
									102	GO:0080090	0.0160258	1.65016	17.6439	27	1435	regulation of primary metabolic process
									103	GO:0051640	0.0161015	11.6085	0.196726	2	16	organelle localization
									104	GO:0019219	0.0166359	1.65877	16.8693	26	1372	regulation of nucleobase-containing compound metabolic process
									105	GO:0019538	0.0178915	1.46662	38.0051	50	3091	protein metabolic process
									106	GO:0031497	0.0183498	4.19954	1.00822	4	82	chromatin assembly
									107	GO:0006334	0.0183498	4.19954	1.00822	4	82	nucleosome assembly
									108	GO:0000910	0.0198678	4.09391	1.03281	4	84	cytokinesis
									109	GO:0006323	0.0202362	3.36621	1.56152	5	127	DNA packaging
									110	GO:0051171	0.0204795	1.62498	17.1767	26	1397	regulation of nitrogen compound metabolic process
									111	GO:0006333	0.0214611	3.99343	1.0574	4	86	chromatin assembly or disassembly
									112	GO:0032196	0.0222863	3.94501	1.0697	4	87	transposition
									113	GO:0006313	0.0222863	3.94501	1.0697	4	87	transposition, DNA-mediated
									114	GO:0042262	0.0223999	9.55771	0.233613	2	19	DNA protection
									115	GO:1903506	0.0240633	1.61254	16.5865	25	1349	regulation of nucleic acid-templated transcription
									116	GO:0006355	0.0240633	1.61254	16.5865	25	1349	regulation of transcription, DNA-templated
									117	GO:2001141	0.0248488	1.60712	16.6357	25	1353	regulation of RNA biosynthetic process
									118	GO:0051252	0.0248488	1.60712	16.6357	25	1353	regulation of RNA metabolic process
									119	GO:0031323	0.0284879	1.57091	17.6931	26	1439	regulation of cellular metabolic process
									120	GO:0006812	0.0297875	1.79873	8.77891	15	714	cation transport
									121	GO:0044267	0.0300852	1.53893	19.4882	28	1585	cellular protein metabolic process
									122	GO:2000112	0.0316349	1.56624	17.0168	25	1384	regulation of cellular macromolecule biosynthetic process
									123	GO:0010556	0.032605	1.5611	17.066	25	1388	regulation of macromolecule biosynthetic process
									124	GO:0031326	0.032605	1.5611	17.066	25	1388	regulation of cellular biosynthetic process
									125	GO:0009889	0.0335978	1.55599	17.1152	25	1392	regulation of biosynthetic process
									126	GO:0000723	0.0344098	4.44632	0.713133	3	58	telomere maintenance
									127	GO:0032200	0.0344098	4.44632	0.713133	3	58	telomere organization
									128	GO:0060249	0.0344098	4.44632	0.713133	3	58	anatomical structure homeostasis
									129	GO:0071496	0.0347407	7.38262	0.29509	2	24	cellular response to external stimulus
									130	GO:0009991	0.0347407	7.38262	0.29509	2	24	response to extracellular stimulus
									131	GO:0031668	0.0347407	7.38262	0.29509	2	24	cellular response to extracellular stimulus
									132	GO:0006357	0.0359421	2.86713	1.81972	5	148	regulation of transcription from RNA polymerase II promoter
									133	GO:0015988	0.0368351	2.847	1.83201	5	149	energy coupled proton transmembrane transport, against electrochemical gradient
									134	GO:0071103	0.0368351	2.847	1.83201	5	149	DNA conformation change
									135	GO:0099131	0.0368351	2.847	1.83201	5	149	ATP hydrolysis coupled ion transmembrane transport
									136	GO:0099132	0.0368351	2.847	1.83201	5	149	ATP hydrolysis coupled cation transmembrane transport
									137	GO:0090662	0.0368351	2.847	1.83201	5	149	ATP hydrolysis coupled transmembrane transport
									138	GO:0015991	0.0368351	2.847	1.83201	5	149	ATP hydrolysis coupled proton transport
									139	GO:0034728	0.0479848	3.0544	1.36479	4	111	nucleosome organization
									140	GO:0007289	0.0482874	26.9392	0.0491816	1	4	spermatid nucleus differentiation
									141	GO:0006997	0.0482874	26.9392	0.0491816	1	4	nucleus organization
									142	GO:0035092	0.0482874	26.9392	0.0491816	1	4	sperm chromatin condensation
									143	GO:0000398	0.0493659	3.81837	0.823792	3	67	mRNA splicing, via spliceosome
									144	GO:0000377	0.0493659	3.81837	0.823792	3	67	RNA splicing, via transesterification reactions with bulged adenosine as nucleophile
Cluster 2 Molecular function (MF)									Cluster 2 Biological process (BP)									Cluster 2 Cellular component (CC)
	GOMFID	Pvalue	OddsRatio	ExpCount	Count	Size	Term			GOBPID	Pvalue	OddsRatio	ExpCount	Count	Size	Term			GOCCID	Pvalue	OddsRatio	ExpCount	Count	Size	Term
1	GO:0003676	2.12e-17	2.53038	96.7804	171	4789	nucleic acid binding		1	GO:0015074	9.7e-14	9.54718	2.87343	22	152	DNA integration		1	GO:0019013	0.00021085	16.6627	0.30753	4	19	viral nucleocapsid
2	GO:1901363	6.93e-10	1.92798	136.612	193	6760	heterocyclic compound binding		2	GO:0006139	1.57e-06	1.87801	69.6808	104	3686	nucleobase-containing compound metabolic process		2	GO:0031515	0.0068319	20.5441	0.129486	2	8	tRNA (m1A) methyltransferase complex
3	GO:0097159	7.23e-10	1.92656	136.673	193	6763	organic cyclic compound binding		3	GO:0090304	3.72e-06	1.85092	64.6334	97	3419	nucleic acid metabolic process		3	GO:0043527	0.0068319	20.5441	0.129486	2	8	tRNA methyltransferase complex
4	GO:0008270	1.76e-09	2.24599	44.4596	85	2200	zinc ion binding		4	GO:0046483	4.93e-06	1.81681	71.3065	104	3772	heterocycle metabolic process		4	GO:0034708	0.0068319	20.5441	0.129486	2	8	methyltransferase complex
5	GO:0005488	1.19e-07	1.93953	242.305	286	11990	binding		5	GO:0006725	5.68e-06	1.80919	71.5145	104	3783	cellular aromatic compound metabolic process		5	GO:0045263	0.00792482	5.53433	0.793103	4	49	proton-transporting ATP synthase complex, coupling factor F(o)
6	GO:0046914	1.31e-07	1.96581	54.3822	92	2691	transition metal ion binding		6	GO:1901360	1.26e-05	1.76385	73.6318	105	3895	organic cyclic compound metabolic process		6	GO:0045259	0.0125984	4.7853	0.906404	4	56	proton-transporting ATP synthase complex
7	GO:0046872	5e-07	1.8229	70.1855	109	3473	metal ion binding		7	GO:0034641	1.39e-05	1.74813	79.303	111	4195	cellular nitrogen compound metabolic process		7	GO:0044423	0.0175852	2.11766	6.0373	12	373	virion part
8	GO:0043169	7.84e-07	1.80223	70.812	109	3504	cation binding		8	GO:0006259	2.89e-05	2.16645	21.1727	41	1120	DNA metabolic process		8	GO:0019028	0.0178858	2.28762	4.64532	10	287	viral capsid
9	GO:0016151	1.41e-05	5.52689	2.22298	11	110	nickel cation binding		9	GO:0044260	8.94e-05	1.63951	90.0217	119	4762	cellular macromolecule metabolic process		9	GO:0000813	0.0180507	11.1992	0.210415	2	13	ESCRT I complex
10	GO:0008168	2.22e-05	3.69596	4.70867	16	233	methyltransferase activity		10	GO:0007034	0.00030952	15.0567	0.340275	4	18	vacuolar transport		10	GO:0019012	0.023568	2.02375	6.29627	12	389	virion
11	GO:0016741	4.51e-05	3.46911	4.9916	16	247	transferase activity, transferring one-carbon groups		11	GO:0006807	0.00062219	1.53655	87.1482	112	4610	nitrogen compound metabolic process		11	GO:0036452	0.0301758	8.20882	0.275158	2	17	ESCRT complex
12	GO:0004017	7.83e-05	4.95954	2.22298	10	110	adenylate kinase activity		12	GO:0043170	0.00090071	1.51238	121.308	146	6417	macromolecule metabolic process		12	GO:0009318	0.0321115	61.219	0.0323716	1	2	exodeoxyribonuclease VII complex
13	GO:0016776	0.00011388	4.72199	2.32402	10	115	phosphotransferase activity, phosphate group as acceptor		13	GO:0044237	0.00096687	1.50347	108.491	133	5739	cellular metabolic process		13	GO:0019773	0.0335937	7.69485	0.291344	2	18	proteasome core complex, alpha-subunit complex
14	GO:0019201	0.00029294	4.16306	2.60695	10	129	nucleotide kinase activity		14	GO:1905037	0.00208263	52.3156	0.0756167	2	4	autophagosome organization		14	GO:0005672	0.0429678	2.46292	2.55735	6	158	transcription factor TFIIA complex
15	GO:0019205	0.00035246	4.05998	2.66757	10	132	nucleobase-containing compound kinase activity		15	GO:0016236	0.00208263	52.3156	0.0756167	2	4	macroautophagy		15	GO:0032040	0.043623	3.18025	1.32723	4	82	small-subunit processome
16	GO:0047869	0.00040728	Inf	0.0404178	2	2	dimethylpropiothetin dethiomethylase activity		16	GO:0000045	0.00208263	52.3156	0.0756167	2	4	autophagosome assembly
17	GO:0004523	0.00043875	6.86392	0.990236	6	49	RNA-DNA hybrid ribonuclease activity		17	GO:0051604	0.00317761	2.66539	4.78276	12	253	protein maturation
18	GO:0070001	0.00163912	3.2747	3.25363	10	161	aspartic-type peptidase activity		18	GO:0007033	0.00507769	26.1537	0.113425	2	6	vacuole organization
19	GO:0004190	0.00163912	3.2747	3.25363	10	161	aspartic-type endopeptidase activity		19	GO:0015914	0.00507769	26.1537	0.113425	2	6	phospholipid transport
20	GO:0008757	0.00249233	4.75521	1.37421	6	68	S-adenosylmethionine-dependent methyltransferase activity		20	GO:0035437	0.00507769	26.1537	0.113425	2	6	maintenance of protein localization in endoplasmic reticulum
21	GO:0003700	0.00265175	2.10795	9.9832	20	494	transcription factor activity, sequence-specific DNA binding		21	GO:0072595	0.00507769	26.1537	0.113425	2	6	maintenance of protein localization in organelle
22	GO:0001071	0.00265175	2.10795	9.9832	20	494	nucleic acid binding transcription factor activity		22	GO:0006621	0.00507769	26.1537	0.113425	2	6	protein retention in ER lumen
23	GO:0016891	0.00332653	4.46597	1.45504	6	72	endoribonuclease activity, producing 5'-phosphomonoesters		23	GO:0051220	0.00507769	26.1537	0.113425	2	6	cytoplasmic sequestering of protein
24	GO:0016426	0.0039115	32.4991	0.101044	2	5	tRNA (adenine) methyltransferase activity		24	GO:0016072	0.00510977	4.06699	1.58795	6	84	rRNA metabolic process
25	GO:0016429	0.0039115	32.4991	0.101044	2	5	tRNA (adenine-N1-)-methyltransferase activity		25	GO:0006364	0.00510977	4.06699	1.58795	6	84	rRNA processing
26	GO:0043167	0.0043731	1.3492	110.522	134	5469	ion binding		26	GO:0006897	0.00702043	20.9213	0.132329	2	7	endocytosis
27	GO:0005548	0.00578903	24.3729	0.121253	2	6	phospholipid transporter activity		27	GO:0015748	0.00702043	20.9213	0.132329	2	7	organophosphate ester transport
28	GO:0046923	0.00578903	24.3729	0.121253	2	6	ER retention sequence binding		28	GO:0007156	0.00729325	5.68684	0.775071	4	41	homophilic cell adhesion via plasma membrane adhesion molecules
29	GO:0004521	0.00630592	3.87609	1.65713	6	82	endoribonuclease activity		29	GO:0098742	0.00794369	5.53676	0.793975	4	42	cell-cell adhesion via plasma-membrane adhesion molecules
30	GO:0033743	0.00799677	19.4972	0.141462	2	7	peptide-methionine (R)-S-oxide reductase activity		30	GO:0044238	0.00869614	1.38037	136.242	155	7207	primary metabolic process
31	GO:0016893	0.00882958	3.59122	1.77838	6	88	endonuclease activity, active with either ribo- or deoxyribonucleic acids and producing 5'-phosphomonoesters		31	GO:0030488	0.00924444	17.4331	0.151233	2	8	tRNA methylation
32	GO:0004540	0.00924747	3.15599	2.34423	7	116	ribonuclease activity		32	GO:0015696	0.00924444	17.4331	0.151233	2	8	ammonium transport
33	GO:0008519	0.0105207	16.2467	0.161671	2	8	ammonium transmembrane transporter activity		33	GO:0010467	0.0100108	1.40762	58.7542	75	3108	gene expression
34	GO:0005315	0.016463	12.1836	0.202089	2	10	inorganic phosphate transmembrane transporter activity		34	GO:0098609	0.010923	5.00787	0.869592	4	46	cell-cell adhesion
35	GO:0043565	0.0176677	2.08516	5.98183	12	296	sequence-specific DNA binding		35	GO:0032879	0.0126496	4.77949	0.9074	4	48	regulation of localization
36	GO:0004842	0.0178998	2.38087	3.94074	9	195	ubiquitin-protein transferase activity		36	GO:0005976	0.0135746	4.67291	0.926304	4	49	polysaccharide metabolic process
37	GO:0019787	0.0178998	2.38087	3.94074	9	195	ubiquitin-like protein transferase activity		37	GO:0000272	0.0144916	13.0727	0.189042	2	10	polysaccharide catabolic process
38	GO:0016846	0.0198555	10.8293	0.222298	2	11	carbon-sulfur lyase activity		38	GO:0070972	0.0172885	3.07379	2.06055	6	109	protein localization to endoplasmic reticulum
39	GO:0008175	0.0198555	10.8293	0.222298	2	11	tRNA methyltransferase activity		39	GO:0006817	0.0174933	11.6193	0.207946	2	11	phosphate ion transport
40	GO:0048040	0.0202089	Inf	0.0202089	1	1	UDP-glucuronate decarboxylase activity		40	GO:0019941	0.0187448	3.01476	2.09836	6	111	modification-dependent protein catabolic process
41	GO:0003677	0.0207524	1.36409	46.339	60	2293	DNA binding		41	GO:0006511	0.0187448	3.01476	2.09836	6	111	ubiquitin-dependent protein catabolic process
42	GO:0003714	0.0235122	9.74576	0.242507	2	12	transcription corepressor activity		42	GO:0043632	0.0187448	3.01476	2.09836	6	111	modification-dependent macromolecule catabolic process
43	GO:0005048	0.0235122	9.74576	0.242507	2	12	signal sequence binding		43	GO:0002685	0.0189042	Inf	0.0189042	1	1	regulation of leukocyte migration
44	GO:0035091	0.0264407	3.76049	1.1317	4	56	phosphatidylinositol binding		44	GO:0050900	0.0189042	Inf	0.0189042	1	1	leukocyte migration
45	GO:0016671	0.0274211	8.85927	0.262716	2	13	oxidoreductase activity, acting on a sulfur group of donors, disulfide as acceptor		45	GO:0072676	0.0189042	Inf	0.0189042	1	1	lymphocyte migration
46	GO:0030976	0.0274211	8.85927	0.262716	2	13	thiamine pyrophosphate binding		46	GO:2000401	0.0189042	Inf	0.0189042	1	1	regulation of lymphocyte migration
47	GO:0008173	0.0308477	4.72329	0.687103	3	34	RNA methyltransferase activity		47	GO:0050853	0.0189042	Inf	0.0189042	1	1	B cell receptor signaling pathway
48	GO:0005509	0.0345897	1.87652	6.60831	12	327	calcium ion binding		48	GO:0050854	0.0189042	Inf	0.0189042	1	1	regulation of antigen receptor-mediated signaling pathway
49	GO:0033218	0.0359493	7.49544	0.303134	2	15	amide binding		49	GO:0050855	0.0189042	Inf	0.0189042	1	1	regulation of B cell receptor signaling pathway
50	GO:0042277	0.0359493	7.49544	0.303134	2	15	peptide binding		50	GO:0034654	0.023844	1.40319	38.073	50	2014	nucleobase-containing compound biosynthetic process
51	GO:0003713	0.0359493	7.49544	0.303134	2	15	transcription coactivator activity		51	GO:0015698	0.0238494	3.89134	1.09644	4	58	inorganic anion transport
52	GO:0000287	0.0410151	4.18252	0.767938	3	38	magnesium ion binding		52	GO:0042254	0.0254059	2.79956	2.2496	6	119	ribosome biogenesis
53	GO:0015116	0.0453515	6.49529	0.343551	2	17	sulfate transmembrane transporter activity		53	GO:0009987	0.030669	1.29657	146.318	161	7740	cellular process
54	GO:0016972	0.0453515	6.49529	0.343551	2	17	thiol oxidase activity		54	GO:0044257	0.0323943	2.63479	2.38193	6	126	cellular protein catabolic process
55	GO:1901682	0.0453515	6.49529	0.343551	2	17	sulfur compound transmembrane transporter activity		55	GO:0051603	0.0323943	2.63479	2.38193	6	126	proteolysis involved in cellular protein catabolic process
									56	GO:0009057	0.0327517	2.0383	5.10413	10	270	macromolecule catabolic process
									57	GO:1903506	0.0328225	1.4458	25.5017	35	1349	regulation of nucleic acid-templated transcription
									58	GO:0006355	0.0328225	1.4458	25.5017	35	1349	regulation of transcription, DNA-templated
									59	GO:2001141	0.0340715	1.44091	25.5773	35	1353	regulation of RNA biosynthetic process
									60	GO:0051252	0.0340715	1.44091	25.5773	35	1353	regulation of RNA metabolic process
									61	GO:0030334	0.0358788	7.46663	0.302467	2	16	regulation of cell migration
									62	GO:0051924	0.0358788	7.46663	0.302467	2	16	regulation of calcium ion transport
									63	GO:2001256	0.0358788	7.46663	0.302467	2	16	regulation of store-operated calcium entry
									64	GO:0051270	0.0358788	7.46663	0.302467	2	16	regulation of cellular component movement
									65	GO:2000145	0.0358788	7.46663	0.302467	2	16	regulation of cell motility
									66	GO:0016477	0.0358788	7.46663	0.302467	2	16	cell migration
									67	GO:0002115	0.0358788	7.46663	0.302467	2	16	store-operated calcium entry
									68	GO:0040012	0.0358788	7.46663	0.302467	2	16	regulation of locomotion
									69	GO:0000917	0.0374524	52.1061	0.0378083	1	2	barrier septum assembly
									70	GO:0032954	0.0374524	52.1061	0.0378083	1	2	regulation of cytokinetic process
									71	GO:0032955	0.0374524	52.1061	0.0378083	1	2	regulation of barrier septum assembly
									72	GO:1903436	0.0374524	52.1061	0.0378083	1	2	regulation of mitotic cytokinetic process
									73	GO:1901891	0.0374524	52.1061	0.0378083	1	2	regulation of cell septum assembly
									74	GO:1902410	0.0374524	52.1061	0.0378083	1	2	mitotic cytokinetic process
									75	GO:1902412	0.0374524	52.1061	0.0378083	1	2	regulation of mitotic cytokinesis
									76	GO:0006310	0.0379735	1.98375	5.23646	10	277	DNA recombination
									77	GO:0071704	0.0394705	1.27559	145.146	159	7678	organic substance metabolic process
									78	GO:0015985	0.0396254	3.28073	1.28548	4	68	energy coupled proton transport, down electrochemical gradient
									79	GO:0015986	0.0396254	3.28073	1.28548	4	68	ATP synthesis coupled proton transport
									80	GO:0006754	0.0396254	3.28073	1.28548	4	68	ATP biosynthetic process
									81	GO:0009142	0.0396254	3.28073	1.28548	4	68	nucleoside triphosphate biosynthetic process
									82	GO:0009145	0.0396254	3.28073	1.28548	4	68	purine nucleoside triphosphate biosynthetic process
									83	GO:0009201	0.0396254	3.28073	1.28548	4	68	ribonucleoside triphosphate biosynthetic process
									84	GO:0009206	0.0396254	3.28073	1.28548	4	68	purine ribonucleoside triphosphate biosynthetic process
									85	GO:0045185	0.0401654	6.96831	0.321371	2	17	maintenance of protein location
									86	GO:0072348	0.0401654	6.96831	0.321371	2	17	sulfur compound transport
									87	GO:0051651	0.0401654	6.96831	0.321371	2	17	maintenance of location in cell
									88	GO:0008272	0.0401654	6.96831	0.321371	2	17	sulfate transport
									89	GO:0032507	0.0401654	6.96831	0.321371	2	17	maintenance of protein location in cell
									90	GO:0006351	0.0403426	1.36671	34.8215	45	1842	transcription, DNA-templated
									91	GO:0097659	0.0403426	1.36671	34.8215	45	1842	nucleic acid-templated transcription
									92	GO:0019219	0.0405127	1.41808	25.9365	35	1372	regulation of nucleobase-containing compound metabolic process
									93	GO:0022613	0.0417865	2.46855	2.53316	6	134	ribonucleoprotein complex biogenesis
									94	GO:0006820	0.0417865	2.46855	2.53316	6	134	anion transport
									95	GO:0019438	0.0423832	1.34298	39.4719	50	2088	aromatic compound biosynthetic process
									96	GO:0008152	0.0428854	1.30424	174.523	187	9232	metabolic process
									97	GO:0032774	0.0449379	1.35441	35.0861	45	1856	RNA biosynthetic process
									98	GO:2000112	0.0450344	1.40399	26.1634	35	1384	regulation of cellular macromolecule biosynthetic process
									99	GO:0018130	0.0458984	1.3344	39.6799	50	2099	heterocycle biosynthetic process
									100	GO:0010556	0.0466231	1.39935	26.239	35	1388	regulation of macromolecule biosynthetic process
									101	GO:0031326	0.0466231	1.39935	26.239	35	1388	regulation of cellular biosynthetic process
									102	GO:0080090	0.0467219	1.39299	27.1275	36	1435	regulation of primary metabolic process
									103	GO:0009889	0.0482536	1.39473	26.3146	35	1392	regulation of biosynthetic process
									104	GO:0031323	0.0483294	1.38853	27.2031	36	1439	regulation of cellular metabolic process
									105	GO:0030163	0.049852	2.3569	2.64658	6	140	protein catabolic process
Cluster 3 Molecular function (MF)									Cluster 3 Biological process (BP)									Cluster 3 Cellular components (CC)
	GOMFID	Pvalue	OddsRatio	ExpCount	Count	Size	Term			GOBPID	Pvalue	OddsRatio	ExpCount	Count	Size	Term			GOCCID	Pvalue	OddsRatio	ExpCount	Count	Size	Term
1	GO:0003676	2.93e-69	2.76982	373.801	667	4789	nucleic acid binding		1	GO:0009987	3.81e-56	3.66798	522.225	732	7740	cellular process		1	GO:0005634	3.26e-92	4.9303	228.489	486	2594	nucleus
2	GO:0005488	3.54e-58	3.13776	935.868	1185	11990	binding		2	GO:0044260	1.18e-45	2.71643	321.297	521	4762	cellular macromolecule metabolic process		2	GO:0043227	2.75e-78	4.39945	288.297	530	3273	membrane-bounded organelle
3	GO:0008270	1.46e-56	3.02611	171.719	380	2200	zinc ion binding		3	GO:0044237	4.26e-44	2.70434	387.216	585	5739	cellular metabolic process		3	GO:0043231	3.32e-76	4.27968	280.81	519	3188	intracellular membrane-bounded organelle
4	GO:1901363	1.97e-56	2.44739	527.645	806	6760	heterocyclic compound binding		4	GO:0090304	8.33e-36	2.47642	230.683	396	3419	nucleic acid metabolic process		4	GO:0044424	7.21e-76	5.1069	399.459	629	4535	intracellular part
5	GO:0097159	2.45e-56	2.44544	527.879	806	6763	organic cyclic compound binding		5	GO:0006139	1.98e-32	2.34552	248.698	408	3686	nucleobase-containing compound metabolic process		5	GO:0005622	5.95e-74	5.12874	411.35	636	4670	intracellular
6	GO:0046914	4.88e-42	2.48801	210.043	399	2691	transition metal ion binding		6	GO:0046483	1.79e-31	2.30897	254.501	412	3772	heterocycle metabolic process		6	GO:0005623	2.67e-70	5.19305	434.252	649	4930	cell
7	GO:0043167	2.26e-31	1.95435	426.878	624	5469	ion binding		7	GO:0006725	3.62e-31	2.29856	255.243	412	3783	cellular aromatic compound metabolic process		7	GO:0044464	2.67e-70	5.19305	434.252	649	4930	cell part
8	GO:0046872	2.28e-28	2.01875	271.082	436	3473	metal ion binding		8	GO:0034641	4.71e-29	2.20889	283.041	437	4195	cellular nitrogen compound metabolic process		8	GO:0043226	1.63e-65	4.05451	353.567	573	4014	organelle
9	GO:0043169	1.71e-27	1.99366	273.501	436	3504	cation binding		9	GO:1901360	7.39e-29	2.21817	262.8	414	3895	organic cyclic compound metabolic process		9	GO:0043229	8.52e-65	3.98445	347.313	566	3943	intracellular organelle
10	GO:0003887	4.31e-10	8.41435	3.59049	19	46	DNA-directed DNA polymerase activity		10	GO:0006807	2.53e-21	1.94733	311.041	443	4610	nitrogen compound metabolic process		10	GO:0000922	1.23e-06	36.5665	0.792752	7	9	spindle pole
11	GO:0016772	8.87e-10	1.78939	96.787	156	1240	transferase activity, transferring phosphorus-containing groups		11	GO:0006260	9.62e-21	3.79889	28.2029	85	418	DNA replication		11	GO:0017119	1.25e-05	5.99575	2.90676	12	33	Golgi transport complex
12	GO:0003677	5.5e-09	1.55278	178.978	251	2293	DNA binding		12	GO:0043170	6.89e-18	1.83874	432.961	555	6417	macromolecule metabolic process		12	GO:0099023	1.35e-05	3.51801	7.04668	20	80	tethering complex
13	GO:0034061	7.27e-09	6.6791	4.13686	19	53	DNA polymerase activity		13	GO:0006259	1.05e-16	2.34995	75.5675	149	1120	DNA metabolic process		13	GO:0000790	1.81e-05	6.40593	2.55442	11	29	nuclear chromatin
14	GO:0016779	2.01e-08	2.6236	22.3235	51	286	nucleotidyltransferase activity		14	GO:0016070	3.69e-15	1.86183	175.897	270	2607	RNA metabolic process		14	GO:0000808	2.54e-05	6.98156	2.20209	10	25	origin recognition complex
15	GO:0016740	1.16e-07	1.49167	180.773	246	2316	transferase activity		15	GO:0010467	1.2e-14	1.79167	209.7	307	3108	gene expression		15	GO:0005674	5.98e-05	Inf	0.352334	4	4	transcription factor TFIIF complex
16	GO:0004017	9.19e-07	3.51983	8.58594	25	110	adenylate kinase activity		16	GO:0009059	2.39e-13	1.77189	186.152	275	2759	macromolecule biosynthetic process		16	GO:0000145	0.000143431	4.33727	3.61142	12	41	exocyst
17	GO:0016776	2.19e-06	3.32325	8.97621	25	115	phosphotransferase activity, phosphate group as acceptor		17	GO:0034645	3.24e-13	1.76838	184.871	273	2740	cellular macromolecule biosynthetic process		17	GO:0009360	0.000143705	12.5154	0.968919	6	11	DNA polymerase III complex
18	GO:0003899	4.98e-06	2.84663	11.7862	29	151	DNA-directed 5'-3' RNA polymerase activity		18	GO:0043412	6.73e-12	2.03448	79.2784	140	1175	macromolecule modification		18	GO:0042575	0.000143705	12.5154	0.968919	6	11	DNA polymerase complex
19	GO:0019201	6.1e-06	3.01977	10.069	26	129	nucleotide kinase activity		19	GO:0006464	4.33e-11	2.10611	63.0179	116	934	cellular protein modification process		19	GO:0044454	0.000197253	2.50829	11.0104	24	125	nuclear chromosome part
20	GO:0016741	7.89e-06	2.32087	19.2793	40	247	transferase activity, transferring one-carbon groups		20	GO:0036211	4.33e-11	2.10611	63.0179	116	934	protein modification process		20	GO:1990234	0.000282284	1.62964	48.1817	72	547	transferase complex
21	GO:0016301	8.48e-06	1.64102	68.9998	105	884	kinase activity		21	GO:0071840	9.91e-11	1.88364	94.122	155	1395	cellular component organization or biogenesis		21	GO:0097346	0.000353856	7.30578	1.49742	7	17	INO80-type complex
22	GO:0097747	9.31e-06	2.63372	13.4253	31	172	RNA polymerase activity		22	GO:0044238	1.17e-10	1.58312	486.263	576	7207	primary metabolic process		22	GO:0070603	0.000353856	7.30578	1.49742	7	17	SWI/SNF superfamily-type complex
23	GO:0034062	9.31e-06	2.63372	13.4253	31	172	5'-3' RNA polymerase activity		23	GO:0016192	3.41e-10	2.7046	26.1113	61	387	vesicle-mediated transport		23	GO:0031011	0.000353856	7.30578	1.49742	7	17	Ino80 complex
24	GO:0019205	9.43e-06	2.93376	10.3031	26	132	nucleobase-containing compound kinase activity		24	GO:0071704	3.63e-10	1.57709	518.042	604	7678	organic substance metabolic process		24	GO:0000228	0.000721171	2.2587	11.9794	24	136	nuclear chromosome
25	GO:0008168	1.12e-05	2.33875	18.1866	38	233	methyltransferase activity		25	GO:0044249	3.95e-10	1.60336	216.312	295	3206	cellular biosynthetic process		25	GO:0048475	0.000890324	2.17824	12.8602	25	146	coated membrane
26	GO:0035639	2.1e-05	1.42954	138	184	1768	purine ribonucleoside triphosphate binding		26	GO:1901576	1.3e-09	1.57274	226.77	304	3361	organic substance biosynthetic process		26	GO:0030117	0.000890324	2.17824	12.8602	25	146	membrane coat
27	GO:0032555	2.24e-05	1.42754	138.156	184	1770	purine ribonucleotide binding		27	GO:0009058	2.03e-09	1.55716	236.823	314	3510	biosynthetic process		27	GO:0043234	0.00141084	1.32092	147.804	180	1678	protein complex
28	GO:0019207	3.35e-05	5.68654	2.65384	11	34	kinase regulator activity		28	GO:0006261	6.51e-09	3.50655	11.9424	35	177	DNA-dependent DNA replication		28	GO:1902494	0.00182749	1.44453	66.1507	89	751	catalytic complex
29	GO:0017056	3.57e-05	17.7907	0.78054	6	10	structural constituent of nuclear pore		29	GO:0006887	6.75e-09	7.0343	3.64343	18	54	exocytosis		29	GO:0044428	0.00205763	1.3873	85.8814	111	975	nuclear part
30	GO:0017076	3.62e-05	1.4118	140.185	185	1796	purine nucleotide binding		30	GO:0015833	1.34e-08	2.10005	44.9357	84	666	peptide transport		30	GO:0005664	0.00456761	4.80867	1.67359	6	19	nuclear origin of replication recognition complex
31	GO:0032553	3.9e-05	1.41076	139.483	184	1787	ribonucleotide binding		31	GO:0042886	1.34e-08	2.10005	44.9357	84	666	amide transport		31	GO:0033202	0.00468631	4.05458	2.20209	7	25	DNA helicase complex
32	GO:0019887	4.66e-05	7.12709	1.8733	9	24	protein kinase regulator activity		32	GO:0006974	1.83e-08	2.43282	27.5282	59	408	cellular response to DNA damage stimulus		32	GO:0005742	0.00533702	5.78344	1.23317	5	14	mitochondrial outer membrane translocase complex
33	GO:0004402	6.39e-05	10.3829	1.17081	7	15	histone acetyltransferase activity		33	GO:0006396	3.44e-08	2.07733	43.6537	81	647	RNA processing		33	GO:0005577	0.00542626	2.30988	7.31093	15	83	fibrinogen complex
34	GO:0005524	6.72e-05	1.42123	122.311	163	1567	ATP binding		34	GO:0015031	4.53e-08	2.05231	44.6658	82	662	protein transport		34	GO:0000439	0.00594429	15.5876	0.440418	3	5	core TFIIH complex
35	GO:0032559	7.17e-05	1.41902	122.467	163	1569	adenyl ribonucleotide binding		35	GO:0006886	5.09e-08	2.1791	36.0295	70	534	intracellular protein transport		35	GO:0032991	0.00745651	1.22324	226.991	257	2577	macromolecular complex
36	GO:0030554	0.000115164	1.40157	124.496	164	1595	adenyl nucleotide binding		36	GO:0044267	5.1e-08	1.67483	106.942	160	1585	cellular protein metabolic process		36	GO:0005956	0.00774928	Inf	0.176167	2	2	protein kinase CK2 complex
37	GO:0061733	0.000168043	8.30534	1.32692	7	17	peptide-lysine-N-acetyltransferase activity		37	GO:0033554	5.25e-08	2.27959	31.1041	63	461	cellular response to stress		37	GO:0032039	0.00774928	Inf	0.176167	2	2	integrator complex
38	GO:0034212	0.000168043	8.30534	1.32692	7	17	peptide N-acetyltransferase activity		38	GO:0071705	5.49e-08	1.96621	51.6153	91	765	nitrogen compound transport		38	GO:0005643	0.00784724	4.16644	1.84975	6	21	nuclear pore
39	GO:0008080	0.000168043	8.30534	1.32692	7	17	N-acetyltransferase activity		39	GO:0045184	6.33e-08	2.03389	45.0032	82	667	establishment of protein localization		39	GO:0000151	0.00841162	1.97216	10.57	19	120	ubiquitin ligase complex
40	GO:0004672	0.000188177	1.67352	42.2272	66	541	protein kinase activity		40	GO:0046907	7.3e-08	2.11904	38.5259	73	571	intracellular transport		40	GO:0005680	0.0104457	1.96427	10.0415	18	114	anaphase-promoting complex
41	GO:0032182	0.000363789	3.75403	3.9027	12	50	ubiquitin-like protein binding		41	GO:0051649	1.04e-07	2.09707	38.8633	73	576	establishment of localization in cell		41	GO:0000152	0.0104457	1.96427	10.0415	18	114	nuclear ubiquitin ligase complex
42	GO:0043168	0.000383929	1.31671	168.206	209	2155	anion binding		42	GO:0016043	1.28e-07	1.71712	86.7677	134	1286	cellular component organization		42	GO:0031461	0.0124239	1.92369	10.2177	18	116	cullin-RING ubiquitin ligase complex
43	GO:0070403	0.000761182	5.93092	1.63913	7	21	NAD+ binding		43	GO:0006270	1.4e-07	3.30278	11.0652	31	164	DNA replication initiation		43	GO:0044431	0.0129658	2.12149	7.31093	14	83	Golgi apparatus part
44	GO:0101005	0.000846095	3.15407	4.83935	13	62	ubiquitinyl hydrolase activity		44	GO:0006281	1.9e-07	2.34433	25.9089	54	384	DNA repair		44	GO:0042025	0.0132147	4.3359	1.49742	5	17	host cell nucleus
45	GO:0036459	0.000846095	3.15407	4.83935	13	62	thiol-dependent ubiquitinyl hydrolase activity		45	GO:0046785	1.99e-07	48.7549	0.607239	7	9	microtubule polymerization		45	GO:0005815	0.0139671	2.48474	4.58034	10	52	microtubule organizing center
46	GO:0043565	0.00088696	1.81556	23.104	39	296	sequence-specific DNA binding		46	GO:0007020	1.99e-07	48.7549	0.607239	7	9	microtubule nucleation		46	GO:0070823	0.0166456	5.1988	1.057	4	12	HDA1 complex
47	GO:0016846	0.000891138	9.8753	0.858594	5	11	carbon-sulfur lyase activity		47	GO:0018205	2.01e-07	8.27478	2.36148	13	35	peptidyl-lysine modification		47	GO:0000118	0.0166456	5.1988	1.057	4	12	histone deacetylase complex
48	GO:0008173	0.000917342	4.27362	2.65384	9	34	RNA methyltransferase activity		48	GO:0016573	4.13e-07	15.6995	1.14701	9	17	histone acetylation		48	GO:0099568	0.0182316	2.16052	6.16585	12	70	cytoplasmic region
49	GO:0000166	0.000946083	1.29071	168.363	206	2157	nucleotide binding		49	GO:0016569	4.36e-07	6.18618	3.30608	15	49	covalent chromatin modification		49	GO:0005938	0.0182316	2.16052	6.16585	12	70	cell cortex
50	GO:1901265	0.000946083	1.29071	168.363	206	2157	nucleoside phosphate binding		50	GO:0016570	4.36e-07	6.18618	3.30608	15	49	histone modification		50	GO:0044448	0.0182316	2.16052	6.16585	12	70	cell cortex part
51	GO:0016407	0.00101902	4.74645	2.18551	8	28	acetyltransferase activity		51	GO:0006468	4.42e-07	2.14042	32.2511	62	478	protein phosphorylation		51	GO:0033647	0.0214403	3.71553	1.67359	5	19	host intracellular organelle
52	GO:0016725	0.00106749	15.7919	0.546378	4	7	oxidoreductase activity, acting on CH or CH2 groups		52	GO:0008104	5e-07	1.91978	47.2297	82	700	protein localization		52	GO:0033648	0.0214403	3.71553	1.67359	5	19	host intracellular membrane-bounded organelle
53	GO:0043015	0.00139764	5.18892	1.79524	7	23	gamma-tubulin binding		53	GO:0051276	5.49e-07	2.20147	28.8776	57	428	chromosome organization		53	GO:0016533	0.021886	20.7583	0.264251	2	3	cyclin-dependent protein kinase 5 holoenzyme complex
54	GO:0019783	0.00155645	2.9153	5.15157	13	66	ubiquitin-like protein-specific protease activity		54	GO:0051258	5.53e-07	3.71948	7.75916	24	115	protein polymerization		54	GO:0030684	0.0219355	1.91203	8.5441	15	97	preribosome
55	GO:0031625	0.00217496	7.40557	1.0147	5	13	ubiquitin protein ligase binding		55	GO:0032774	7.44e-07	1.56024	125.226	176	1856	RNA biosynthetic process		55	GO:0032040	0.0262449	1.96728	7.22285	13	82	small-subunit processome
56	GO:0044389	0.00217496	7.40557	1.0147	5	13	ubiquitin-like protein ligase binding		56	GO:0070727	8.86e-07	1.99515	38.7958	70	575	cellular macromolecule localization		56	GO:0031515	0.0272187	6.23262	0.704668	3	8	tRNA (m1A) methyltransferase complex
57	GO:0030983	0.00238759	4.6118	1.95135	7	25	mismatched DNA binding		57	GO:0034613	8.86e-07	1.99515	38.7958	70	575	cellular protein localization		57	GO:0043527	0.0272187	6.23262	0.704668	3	8	tRNA methyltransferase complex
58	GO:0036094	0.00278534	1.25204	176.792	211	2265	small molecule binding		58	GO:0006325	1.18e-06	2.94419	12.1448	31	180	chromatin organization		58	GO:0034708	0.0272187	6.23262	0.704668	3	8	methyltransferase complex
59	GO:0005515	0.00289651	1.19495	333.915	377	4278	protein binding		59	GO:0071702	1.32e-06	1.76285	61.736	99	915	organic substance transport		59	GO:0033588	0.0272403	2.97373	2.37825	6	27	Elongator holoenzyme complex
60	GO:0016410	0.0030501	4.36881	2.02941	7	26	N-acyltransferase activity		60	GO:0018393	1.39e-06	12.5575	1.28195	9	19	internal peptidyl-lysine acetylation		60	GO:0005794	0.0273465	1.8991	8.0156	14	91	Golgi apparatus
61	GO:0070035	0.00312975	3.44519	3.12216	9	40	purine NTP-dependent helicase activity		61	GO:0018394	1.39e-06	12.5575	1.28195	9	19	peptidyl-lysine acetylation		61	GO:0005635	0.0321729	2.83819	2.46634	6	28	nuclear envelope
62	GO:0008026	0.00312975	3.44519	3.12216	9	40	ATP-dependent helicase activity		62	GO:0043543	1.39e-06	12.5575	1.28195	9	19	protein acylation		62	GO:0044433	0.0350075	1.82717	8.27985	14	94	cytoplasmic vesicle part
63	GO:0016773	0.00352826	1.44689	51.5157	71	660	phosphotransferase activity, alcohol group as acceptor		63	GO:0006473	1.39e-06	12.5575	1.28195	9	19	protein acetylation		63	GO:0005672	0.0366793	1.60382	13.9172	21	158	transcription factor TFIIA complex
64	GO:0097367	0.00379748	1.25105	163.133	195	2090	carbohydrate derivative binding		64	GO:0006475	1.39e-06	12.5575	1.28195	9	19	internal protein amino acid acetylation		64	GO:0030896	0.0382045	5.19318	0.792752	3	9	checkpoint clamp complex
65	GO:0016151	0.00500686	2.17363	8.58594	17	110	nickel cation binding		65	GO:0051641	2.44e-06	1.90287	42.1694	73	625	cellular localization		65	GO:0005819	0.0382939	1.76005	9.16068	15	104	spindle
66	GO:0016703	0.005293	7.89448	0.78054	4	10	oxidoreductase activity, acting on single donors with incorporation of molecular oxygen, incorporation of one atom of oxygen (internal monooxygenases or internal mixed function oxidases)		66	GO:0018193	2.82e-06	4.04471	5.73503	19	85	peptidyl-amino acid modification		66	GO:0030662	0.0390946	2.04387	5.37309	10	61	coated vesicle membrane
67	GO:0043130	0.0056788	3.38865	2.80995	8	36	ubiquitin binding		67	GO:0022613	2.87e-06	3.2336	9.04111	25	134	ribonucleoprotein complex biogenesis		67	GO:0030659	0.0390946	2.04387	5.37309	10	61	cytoplasmic vesicle membrane
68	GO:0016538	0.0060603	5.38487	1.24886	5	16	cyclin-dependent protein serine/threonine kinase regulator activity		68	GO:0006904	3.01e-06	6.06416	2.90125	13	43	vesicle docking involved in exocytosis		68	GO:0030120	0.0390946	2.04387	5.37309	10	61	vesicle coat
69	GO:0050290	0.00608835	Inf	0.156108	2	2	sphingomyelin phosphodiesterase D activity		69	GO:0006996	3.19e-06	1.75681	57.3503	92	850	organelle organization		69	GO:0030135	0.0390946	2.04387	5.37309	10	61	coated vesicle
70	GO:0004748	0.00608835	Inf	0.156108	2	2	ribonucleoside-diphosphate reductase activity, thioredoxin disulfide as acceptor		70	GO:0006351	4.25e-06	1.5146	124.282	171	1842	transcription, DNA-templated		70	GO:0005663	0.0412276	10.3778	0.352334	2	4	DNA replication factor C complex
71	GO:0061731	0.00608835	Inf	0.156108	2	2	ribonucleoside-diphosphate reductase activity		71	GO:0097659	4.25e-06	1.5146	124.282	171	1842	nucleic acid-templated transcription		71	GO:0005657	0.0412276	10.3778	0.352334	2	4	replication fork
72	GO:0043752	0.00608835	Inf	0.156108	2	2	adenosylcobinamide kinase activity		72	GO:0016310	5.77e-06	1.94434	35.5572	63	527	phosphorylation		72	GO:0000814	0.0412276	10.3778	0.352334	2	4	ESCRT II complex
73	GO:0016728	0.00608835	Inf	0.156108	2	2	oxidoreductase activity, acting on CH or CH2 groups, disulfide as acceptor		73	GO:0032940	5.83e-06	3.65029	6.54469	20	97	secretion by cell		73	GO:0031981	0.0428145	1.25061	68.3528	82	776	nuclear lumen
74	GO:0004583	0.00608835	Inf	0.156108	2	2	dolichyl-phosphate-glucose-glycolipid alpha-glucosyltransferase activity		74	GO:0001510	6.05e-06	6.98558	2.22654	11	33	RNA methylation		74	GO:0033646	0.0463691	2.88837	2.02592	5	23	host intracellular part
75	GO:0060703	0.00608835	Inf	0.156108	2	2	deoxyribonuclease inhibitor activity		75	GO:0048278	6.92e-06	5.51151	3.10367	13	46	vesicle docking		75	GO:0043656	0.0463691	2.88837	2.02592	5	23	intracellular region of host
76	GO:0005157	0.00608835	Inf	0.156108	2	2	macrophage colony-stimulating factor receptor binding		76	GO:0043933	7.12e-06	1.96349	33.5331	60	497	macromolecular complex subunit organization		76	GO:0070013	0.0491658	1.23543	71.6119	85	813	intracellular organelle lumen
77	GO:0005127	0.00608835	Inf	0.156108	2	2	ciliary neurotrophic factor receptor binding		77	GO:0006891	7.91e-06	5.99159	2.69884	12	40	intra-Golgi vesicle-mediated transport		77	GO:0043233	0.0491658	1.23543	71.6119	85	813	organelle lumen
78	GO:0001130	0.00608835	Inf	0.156108	2	2	bacterial-type RNA polymerase transcription factor activity, sequence-specific DNA binding		78	GO:0043486	1.15e-05	6.40239	2.36148	11	35	histone exchange		78	GO:0031974	0.0491658	1.23543	71.6119	85	813	membrane-enclosed lumen
79	GO:0010011	0.00608835	Inf	0.156108	2	2	auxin binding		79	GO:0022406	1.16e-05	5.19571	3.23861	13	48	membrane docking
80	GO:0010277	0.00608835	Inf	0.156108	2	2	chlorophyllide a oxygenase [overall] activity		80	GO:0006367	1.24e-05	2.57598	13.5617	31	201	transcription initiation from RNA polymerase II promoter
81	GO:0001216	0.00608835	Inf	0.156108	2	2	bacterial-type RNA polymerase transcriptional activator activity, sequence-specific DNA binding		81	GO:0018130	1.25e-05	1.4577	141.622	188	2099	heterocycle biosynthetic process
82	GO:0008175	0.00780836	6.76628	0.858594	4	11	tRNA methyltransferase activity		82	GO:0042254	1.3e-05	3.18957	8.02905	22	119	ribosome biogenesis
83	GO:0008171	0.0109976	5.92013	0.936649	4	12	O-methyltransferase activity		83	GO:0006950	1.34e-05	1.73806	51.3454	82	761	response to stress
84	GO:0019899	0.0112804	2.02239	8.58594	16	110	enzyme binding		84	GO:0031109	1.4e-05	13.9242	0.944594	7	14	microtubule polymerization or depolymerization
85	GO:0098519	0.0119959	2.5242	4.44908	10	57	nucleotide phosphatase activity, acting on free nucleotides		85	GO:0044085	1.53e-05	1.73636	50.7382	81	752	cellular component biogenesis
86	GO:0008757	0.0156301	2.28976	5.30767	11	68	S-adenosylmethionine-dependent methyltransferase activity		86	GO:0019222	1.63e-05	1.51877	102.623	143	1521	regulation of metabolic process
87	GO:0003690	0.0169627	2.37231	4.68324	10	60	double-stranded DNA binding		87	GO:0060255	2.02e-05	1.51677	100.464	140	1489	regulation of macromolecule metabolic process
88	GO:0043539	0.0173159	23.6562	0.234162	2	3	protein serine/threonine kinase activator activity		88	GO:0001934	2.06e-05	Inf	0.269884	4	4	positive regulation of protein phosphorylation
89	GO:0016534	0.0173159	23.6562	0.234162	2	3	cyclin-dependent protein kinase 5 activator activity		89	GO:0042327	2.06e-05	Inf	0.269884	4	4	positive regulation of phosphorylation
90	GO:0004057	0.0173159	23.6562	0.234162	2	3	arginyltransferase activity		90	GO:0043044	2.08e-05	5.90893	2.49643	11	37	ATP-dependent chromatin remodeling
91	GO:0032183	0.0196193	4.73552	1.09276	4	14	SUMO binding		91	GO:0008152	2.55e-05	1.39036	622.892	675	9232	metabolic process
92	GO:0070122	0.0196193	4.73552	1.09276	4	14	isopeptidase activity		92	GO:0065007	2.96e-05	1.37519	207.608	258	3077	biological regulation
93	GO:0070140	0.0196193	4.73552	1.09276	4	14	SUMO-specific isopeptidase activity		93	GO:0033036	2.98e-05	1.66724	56.5407	87	838	macromolecule localization
94	GO:0070138	0.0196193	4.73552	1.09276	4	14	ubiquitin-like protein-specific isopeptidase activity		94	GO:0046903	3.1e-05	3.19109	7.28687	20	108	secretion
95	GO:0016929	0.0196193	4.73552	1.09276	4	14	SUMO-specific protease activity		95	GO:0031323	3.25e-05	1.50916	97.0908	135	1439	regulation of cellular metabolic process
96	GO:0004549	0.0197196	7.10029	0.624432	3	8	tRNA-specific ribonuclease activity		96	GO:0006338	3.68e-05	4.54436	3.57596	13	53	chromatin remodeling
97	GO:0004674	0.0210464	1.86285	9.21038	16	118	protein serine/threonine kinase activity		97	GO:0051604	3.85e-05	2.26961	17.0702	35	253	protein maturation
98	GO:0042086	0.0314944	3.94578	1.24886	4	16	5-methyl-5,6,7,8-tetrahydromethanopterin-dependent methyltransferase activity		98	GO:0050789	4.01e-05	1.37735	192.697	241	2856	regulation of biological process
99	GO:0016857	0.0314944	3.94578	1.24886	4	16	racemase and epimerase activity, acting on carbohydrates and derivatives		99	GO:0019438	4.21e-05	1.42465	140.879	184	2088	aromatic compound biosynthetic process
100	GO:0030269	0.0314944	3.94578	1.24886	4	16	tetrahydromethanopterin S-methyltransferase activity		100	GO:0034654	4.95e-05	1.42641	135.887	178	2014	nucleobase-containing compound biosynthetic process
101	GO:0008172	0.0314944	3.94578	1.24886	4	16	S-methyltransferase activity		101	GO:0032259	5.57e-05	3.27762	6.40974	18	95	methylation
102	GO:0052592	0.0328443	11.8274	0.312216	2	4	oxidoreductase activity, acting on CH or CH2 groups, with an iron-sulfur protein as acceptor		102	GO:0080090	6.65e-05	1.48536	96.8209	133	1435	regulation of primary metabolic process
103	GO:0004590	0.0328443	11.8274	0.312216	2	4	orotidine-5'-phosphate decarboxylase activity		103	GO:0031325	7.43e-05	4.5308	3.30608	12	49	positive regulation of cellular metabolic process
104	GO:0019209	0.0328443	11.8274	0.312216	2	4	kinase activator activity		104	GO:0050794	9.32e-05	1.3602	185.815	231	2754	regulation of cellular process
105	GO:0004418	0.0328443	11.8274	0.312216	2	4	hydroxymethylbilane synthase activity		105	GO:0009893	0.000112817	4.29774	3.44102	12	51	positive regulation of metabolic process
106	GO:0047465	0.0328443	11.8274	0.312216	2	4	N-acylglucosamine-6-phosphate 2-epimerase activity		106	GO:0010604	0.000112817	4.29774	3.44102	12	51	positive regulation of macromolecule metabolic process
107	GO:0030295	0.0328443	11.8274	0.312216	2	4	protein kinase activator activity		107	GO:0016072	0.000133398	3.29384	5.66756	16	84	rRNA metabolic process
108	GO:0016307	0.0328443	11.8274	0.312216	2	4	phosphatidylinositol phosphate kinase activity		108	GO:0006364	0.000133398	3.29384	5.66756	16	84	rRNA processing
109	GO:0033170	0.0328443	11.8274	0.312216	2	4	protein-DNA loading ATPase activity		109	GO:1901362	0.000145336	1.37877	149.448	190	2215	organic cyclic compound biosynthetic process
110	GO:0004146	0.0328443	11.8274	0.312216	2	4	dihydrofolate reductase activity		110	GO:0051726	0.000165298	2.96717	6.94951	18	103	regulation of cell cycle
111	GO:0003689	0.0328443	11.8274	0.312216	2	4	DNA clamp loader activity		111	GO:0043414	0.00017388	3.78447	4.11573	13	61	macromolecule methylation
112	GO:0043140	0.0328443	11.8274	0.312216	2	4	ATP-dependent 3'-5' DNA helicase activity		112	GO:0006366	0.000179857	1.9356	23.5474	42	349	transcription from RNA polymerase II promoter
113	GO:0043138	0.0328443	11.8274	0.312216	2	4	3'-5' DNA helicase activity		113	GO:0016071	0.000220412	2.07595	17.8798	34	265	mRNA metabolic process
114	GO:0046429	0.0328443	11.8274	0.312216	2	4	4-hydroxy-3-methylbut-2-en-1-yl diphosphate synthase activity		114	GO:0051171	0.000228962	1.44674	94.257	127	1397	regulation of nitrogen compound metabolic process
115	GO:0000213	0.0328443	11.8274	0.312216	2	4	tRNA-intron endonuclease activity		115	GO:0019219	0.000235643	1.44943	92.5702	125	1372	regulation of nucleobase-containing compound metabolic process
116	GO:0003678	0.033101	1.59399	14.5181	22	186	DNA helicase activity		116	GO:0070647	0.000240031	2.8653	7.15192	18	106	protein modification by small protein conjugation or removal
117	GO:0000989	0.0331505	1.55882	16.1572	24	207	transcription factor activity, transcription factor binding		117	GO:0010468	0.000289845	1.43124	97.4281	130	1444	regulation of gene expression
118	GO:0003712	0.0331505	1.55882	16.1572	24	207	transcription cofactor activity		118	GO:1905818	0.000304726	4.49829	2.76631	10	41	regulation of chromosome separation
119	GO:0042802	0.0381941	1.68174	10.6934	17	137	identical protein binding		119	GO:0051983	0.000304726	4.49829	2.76631	10	41	regulation of chromosome segregation
120	GO:0046527	0.0387106	3.64204	1.32692	4	17	glucosyltransferase activity		120	GO:0051304	0.000304726	4.49829	2.76631	10	41	chromosome separation
121	GO:0000988	0.0402783	1.47302	19.8257	28	254	transcription factor activity, protein binding		121	GO:0051306	0.000304726	4.49829	2.76631	10	41	mitotic sister chromatid separation
122	GO:0008234	0.0481249	1.62709	11.0056	17	141	cysteine-type peptidase activity		122	GO:1902099	0.000304726	4.49829	2.76631	10	41	regulation of metaphase/anaphase transition of cell cycle
123	GO:0005487	0.0487319	4.43686	0.858594	3	11	nucleocytoplasmic transporter activity		123	GO:0033045	0.000304726	4.49829	2.76631	10	41	regulation of sister chromatid segregation
124	GO:0061608	0.0487319	4.43686	0.858594	3	11	nuclear import signal receptor activity		124	GO:0033047	0.000304726	4.49829	2.76631	10	41	regulation of mitotic sister chromatid segregation
									125	GO:0044784	0.000304726	4.49829	2.76631	10	41	metaphase/anaphase transition of cell cycle
									126	GO:0051783	0.000304726	4.49829	2.76631	10	41	regulation of nuclear division
									127	GO:0030071	0.000304726	4.49829	2.76631	10	41	regulation of mitotic metaphase/anaphase transition
									128	GO:0010965	0.000304726	4.49829	2.76631	10	41	regulation of mitotic sister chromatid separation
									129	GO:0007091	0.000304726	4.49829	2.76631	10	41	metaphase/anaphase transition of mitotic cell cycle
									130	GO:0007088	0.000304726	4.49829	2.76631	10	41	regulation of mitotic nuclear division
									131	GO:0048523	0.000315961	2.32603	11.8749	25	176	negative regulation of cellular process
									132	GO:0048519	0.000365244	2.08846	16.193	31	240	negative regulation of biological process
									133	GO:1901990	0.000376097	4.35736	2.83378	10	42	regulation of mitotic cell cycle phase transition
									134	GO:1901987	0.000376097	4.35736	2.83378	10	42	regulation of cell cycle phase transition
									135	GO:0044770	0.000376097	4.35736	2.83378	10	42	cell cycle phase transition
									136	GO:0044772	0.000376097	4.35736	2.83378	10	42	mitotic cell cycle phase transition
									137	GO:0030168	0.000389759	3.0844	5.60009	15	83	platelet activation
									138	GO:1902589	0.000397724	2.13603	14.8436	29	220	single-organism organelle organization
									139	GO:0048518	0.000432033	2.54821	8.77123	20	130	positive regulation of biological process
									140	GO:0033044	0.000460854	4.22497	2.90125	10	43	regulation of chromosome organization
									141	GO:0048522	0.000481412	2.68107	7.55675	18	112	positive regulation of cellular process
									142	GO:0007596	0.000507903	2.99578	5.73503	15	85	blood coagulation
									143	GO:0006269	0.000610882	18.508	0.472297	4	7	DNA replication, synthesis of RNA primer
									144	GO:0031401	0.000610882	18.508	0.472297	4	7	positive regulation of protein modification process
									145	GO:0045937	0.000610882	18.508	0.472297	4	7	positive regulation of phosphate metabolic process
									146	GO:0010562	0.000610882	18.508	0.472297	4	7	positive regulation of phosphorus metabolic process
									147	GO:0001775	0.000655365	2.91208	5.86998	15	87	cell activation
									148	GO:0016556	0.000733881	9.92309	0.809652	5	12	mRNA modification
									149	GO:0080009	0.000733881	9.92309	0.809652	5	12	mRNA methylation
									150	GO:0044271	0.000772919	1.30821	173.67	211	2574	cellular nitrogen compound biosynthetic process
									151	GO:0010556	0.000796066	1.3999	93.6497	123	1388	regulation of macromolecule biosynthetic process
									152	GO:0031326	0.000796066	1.3999	93.6497	123	1388	regulation of cellular biosynthetic process
									153	GO:0034470	0.000810576	1.80879	23.7498	40	352	ncRNA processing
									154	GO:0032968	0.000851544	6.95126	1.21448	6	18	positive regulation of transcription elongation from RNA polymerase II promoter
									155	GO:0034243	0.000851544	6.95126	1.21448	6	18	regulation of transcription elongation from RNA polymerase II promoter
									156	GO:0032786	0.000851544	6.95126	1.21448	6	18	positive regulation of DNA-templated transcription, elongation
									157	GO:0009889	0.000888086	1.39497	93.9196	123	1392	regulation of biosynthetic process
									158	GO:2001141	0.000898187	1.39977	91.2883	120	1353	regulation of RNA biosynthetic process
									159	GO:0051252	0.000898187	1.39977	91.2883	120	1353	regulation of RNA metabolic process
									160	GO:0065003	0.000915149	1.69033	30.9692	49	459	macromolecular complex assembly
									161	GO:0034660	0.000915149	1.69033	30.9692	49	459	ncRNA metabolic process
									162	GO:0007346	0.000973765	3.76697	3.17114	10	47	regulation of mitotic cell cycle
									163	GO:0070271	0.00100885	1.78529	24.0197	40	356	protein complex biogenesis
									164	GO:0006461	0.00100885	1.78529	24.0197	40	356	protein complex assembly
									165	GO:0006298	0.00101856	5.41007	1.68677	7	25	mismatch repair
									166	GO:2000112	0.00102122	1.39036	93.3799	122	1384	regulation of cellular macromolecule biosynthetic process
									167	GO:0000819	0.00111588	3.40869	3.77838	11	56	sister chromatid segregation
									168	GO:0000070	0.00111588	3.40869	3.77838	11	56	mitotic sister chromatid segregation
									169	GO:0007067	0.00111588	3.40869	3.77838	11	56	mitotic nuclear division
									170	GO:1903506	0.00115238	1.39004	91.0184	119	1349	regulation of nucleic acid-templated transcription
									171	GO:0006355	0.00115238	1.39004	91.0184	119	1349	regulation of transcription, DNA-templated
									172	GO:2001020	0.00115656	13.8799	0.539768	4	8	regulation of response to DNA damage stimulus
									173	GO:0006282	0.00115656	13.8799	0.539768	4	8	regulation of DNA repair
									174	GO:0080135	0.00115656	13.8799	0.539768	4	8	regulation of cellular response to stress
									175	GO:0032784	0.00117415	6.41602	1.28195	6	19	regulation of DNA-templated transcription, elongation
									176	GO:0007049	0.00126243	1.6707	30.6318	48	454	cell cycle
									177	GO:0070646	0.00130005	3.33431	3.84585	11	57	protein modification by small protein removal
									178	GO:0016579	0.00130005	3.33431	3.84585	11	57	protein deubiquitination
									179	GO:0007599	0.00133348	2.68674	6.2748	15	93	hemostasis
									180	GO:0050878	0.00133348	2.68674	6.2748	15	93	regulation of body fluid levels
									181	GO:0050817	0.00133348	2.68674	6.2748	15	93	coagulation
									182	GO:0097435	0.00137011	3.91711	2.76631	9	41	supramolecular fiber organization
									183	GO:0048193	0.00146825	2.13494	11.74	23	174	Golgi vesicle transport
									184	GO:1903047	0.00157484	3.04346	4.52056	12	67	mitotic cell cycle process
									185	GO:0071822	0.0017018	1.72907	24.6944	40	366	protein complex subunit organization
									186	GO:0000278	0.00184972	2.58658	6.47722	15	96	mitotic cell cycle
									187	GO:0043623	0.00195578	1.81942	19.4316	33	288	cellular protein complex assembly
									188	GO:0051247	0.00197096	11.103	0.607239	4	9	positive regulation of protein metabolic process
									189	GO:0032270	0.00197096	11.103	0.607239	4	9	positive regulation of cellular protein metabolic process
									190	GO:0010564	0.00219132	3.31715	3.50849	10	52	regulation of cell cycle process
									191	GO:0016485	0.0022334	2.18659	9.98571	20	148	protein processing
									192	GO:0000075	0.0023118	3.58047	2.96872	9	44	cell cycle checkpoint
									193	GO:0030163	0.00270657	2.19615	9.44594	19	140	protein catabolic process
									194	GO:0045944	0.00271269	5.21173	1.48436	6	22	positive regulation of transcription from RNA polymerase II promoter
									195	GO:0051716	0.00288838	1.32437	107.886	135	1599	cellular response to stimulus
									196	GO:0031570	0.00322625	6.31261	1.07954	5	16	DNA integrity checkpoint
									197	GO:0000077	0.00322625	6.31261	1.07954	5	16	DNA damage checkpoint
									198	GO:0006397	0.00351652	1.94317	13.2918	24	197	mRNA processing
									199	GO:0051090	0.00431977	5.78608	1.14701	5	17	regulation of sequence-specific DNA binding transcription factor activity
									200	GO:0098813	0.00447967	2.32619	7.08445	15	105	nuclear chromosome segregation
									201	GO:0007040	0.0045475	Inf	0.134942	2	2	lysosome organization
									202	GO:0043408	0.0045475	Inf	0.134942	2	2	regulation of MAPK cascade
									203	GO:0001919	0.0045475	Inf	0.134942	2	2	regulation of receptor recycling
									204	GO:0042632	0.0045475	Inf	0.134942	2	2	cholesterol homeostasis
									205	GO:0043213	0.0045475	Inf	0.134942	2	2	bacteriocin transport
									206	GO:0032008	0.0045475	Inf	0.134942	2	2	positive regulation of TOR signaling
									207	GO:0000393	0.0045475	Inf	0.134942	2	2	spliceosomal conformational changes to generate catalytic conformation
									208	GO:0043200	0.0045475	Inf	0.134942	2	2	response to amino acid
									209	GO:0000350	0.0045475	Inf	0.134942	2	2	generation of catalytic spliceosome for second transesterification step
									210	GO:0055092	0.0045475	Inf	0.134942	2	2	sterol homeostasis
									211	GO:0070997	0.0045475	Inf	0.134942	2	2	neuron death
									212	GO:0000165	0.0045475	Inf	0.134942	2	2	MAPK cascade
									213	GO:0071345	0.0045475	Inf	0.134942	2	2	cellular response to cytokine stimulus
									214	GO:0032324	0.0045475	Inf	0.134942	2	2	molybdopterin cofactor biosynthetic process
									215	GO:0043523	0.0045475	Inf	0.134942	2	2	regulation of neuron apoptotic process
									216	GO:0043524	0.0045475	Inf	0.134942	2	2	negative regulation of neuron apoptotic process
									217	GO:0046039	0.0045475	Inf	0.134942	2	2	GTP metabolic process
									218	GO:0051402	0.0045475	Inf	0.134942	2	2	neuron apoptotic process
									219	GO:0023014	0.0045475	Inf	0.134942	2	2	signal transduction by protein phosphorylation
									220	GO:0001881	0.0045475	Inf	0.134942	2	2	receptor recycling
									221	GO:1901214	0.0045475	Inf	0.134942	2	2	regulation of neuron death
									222	GO:1901215	0.0045475	Inf	0.134942	2	2	negative regulation of neuron death
									223	GO:0019221	0.0045475	Inf	0.134942	2	2	cytokine-mediated signaling pathway
									224	GO:0070120	0.0045475	Inf	0.134942	2	2	ciliary neurotrophic factor-mediated signaling pathway
									225	GO:0071229	0.0045475	Inf	0.134942	2	2	cellular response to acid chemical
									226	GO:0071230	0.0045475	Inf	0.134942	2	2	cellular response to amino acid stimulus
									227	GO:0080171	0.0045475	Inf	0.134942	2	2	lytic vacuole organization
									228	GO:0043410	0.0045475	Inf	0.134942	2	2	positive regulation of MAPK cascade
									229	GO:0034097	0.0045475	Inf	0.134942	2	2	response to cytokine
									230	GO:0034622	0.00459504	1.62154	26.1113	40	387	cellular macromolecular complex assembly
									231	GO:0045935	0.00462353	3.47787	2.69884	8	40	positive regulation of nucleobase-containing compound metabolic process
									232	GO:1902680	0.00462353	3.47787	2.69884	8	40	positive regulation of RNA biosynthetic process
									233	GO:0051254	0.00462353	3.47787	2.69884	8	40	positive regulation of RNA metabolic process
									234	GO:0045893	0.00462353	3.47787	2.69884	8	40	positive regulation of transcription, DNA-templated
									235	GO:1903508	0.00462353	3.47787	2.69884	8	40	positive regulation of nucleic acid-templated transcription
									236	GO:0001932	0.00462891	7.92939	0.742181	4	11	regulation of protein phosphorylation
									237	GO:0008380	0.00482024	2.23387	7.82663	16	116	RNA splicing
									238	GO:0045786	0.00501559	2.90107	3.91332	10	58	negative regulation of cell cycle
									239	GO:0006605	0.0054009	1.84257	14.5063	25	215	protein targeting
									240	GO:0009891	0.00629953	3.27275	2.83378	8	42	positive regulation of biosynthetic process
									241	GO:0051173	0.00629953	3.27275	2.83378	8	42	positive regulation of nitrogen compound metabolic process
									242	GO:0010557	0.00629953	3.27275	2.83378	8	42	positive regulation of macromolecule biosynthetic process
									243	GO:0031328	0.00629953	3.27275	2.83378	8	42	positive regulation of cellular biosynthetic process
									244	GO:0033043	0.00641208	2.49588	5.33021	12	79	regulation of organelle organization
									245	GO:0016575	0.00657642	6.93764	0.809652	4	12	histone deacetylation
									246	GO:0098732	0.00657642	6.93764	0.809652	4	12	macromolecule deacylation
									247	GO:0035601	0.00657642	6.93764	0.809652	4	12	protein deacylation
									248	GO:0006476	0.00657642	6.93764	0.809652	4	12	protein deacetylation
									249	GO:0031399	0.00725354	4.95868	1.28195	5	19	regulation of protein modification process
									250	GO:0019941	0.00752442	2.17971	7.48928	15	111	modification-dependent protein catabolic process
									251	GO:0006511	0.00752442	2.17971	7.48928	15	111	ubiquitin-dependent protein catabolic process
									252	GO:0043632	0.00752442	2.17971	7.48928	15	111	modification-dependent macromolecule catabolic process
									253	GO:0034728	0.00752442	2.17971	7.48928	15	111	nucleosome organization
									254	GO:0000226	0.00764472	2.55334	4.79044	11	71	microtubule cytoskeleton organization
									255	GO:0022607	0.00831784	1.43519	43.114	59	639	cellular component assembly
									256	GO:0010628	0.00839978	3.09042	2.96872	8	44	positive regulation of gene expression
									257	GO:0044068	0.00872179	10.398	0.472297	3	7	modulation by symbiont of host cellular process
									258	GO:0052248	0.00872179	10.398	0.472297	3	7	modulation of programmed cell death in other organism involved in symbiotic interaction
									259	GO:0019050	0.00872179	10.398	0.472297	3	7	suppression by virus of host apoptotic process
									260	GO:0019054	0.00872179	10.398	0.472297	3	7	modulation by virus of host process
									261	GO:0019082	0.00872179	10.398	0.472297	3	7	viral protein processing
									262	GO:0033668	0.00872179	10.398	0.472297	3	7	negative regulation by symbiont of host apoptotic process
									263	GO:0052040	0.00872179	10.398	0.472297	3	7	modulation by symbiont of host programmed cell death
									264	GO:0052041	0.00872179	10.398	0.472297	3	7	negative regulation by symbiont of host programmed cell death
									265	GO:0052490	0.00872179	10.398	0.472297	3	7	negative regulation by organism of programmed cell death in other organism involved in symbiotic interaction
									266	GO:0052433	0.00872179	10.398	0.472297	3	7	modulation by organism of apoptotic process in other organism involved in symbiotic interaction
									267	GO:0044531	0.00872179	10.398	0.472297	3	7	modulation of programmed cell death in other organism
									268	GO:0044532	0.00872179	10.398	0.472297	3	7	modulation of apoptotic process in other organism
									269	GO:0052150	0.00872179	10.398	0.472297	3	7	modulation by symbiont of host apoptotic process
									270	GO:0039526	0.00872179	10.398	0.472297	3	7	modulation by virus of host apoptotic process
									271	GO:0006796	0.00878768	1.36018	61.601	80	913	phosphate-containing compound metabolic process
									272	GO:1902533	0.00899854	6.16629	0.877123	4	13	positive regulation of intracellular signal transduction
									273	GO:0042325	0.00899854	6.16629	0.877123	4	13	regulation of phosphorylation
									274	GO:0006793	0.00925929	1.35669	61.736	80	915	phosphorus metabolic process
									275	GO:0042060	0.00957034	2.11314	7.69169	15	114	wound healing
									276	GO:0042981	0.0096278	3.00665	3.03619	8	45	regulation of apoptotic process
									277	GO:0043067	0.0096278	3.00665	3.03619	8	45	regulation of programmed cell death
									278	GO:0010941	0.0096278	3.00665	3.03619	8	45	regulation of cell death
									279	GO:0043066	0.00969063	3.78847	1.88919	6	28	negative regulation of apoptotic process
									280	GO:0043069	0.00969063	3.78847	1.88919	6	28	negative regulation of programmed cell death
									281	GO:0006304	0.00969063	3.78847	1.88919	6	28	DNA modification
									282	GO:0060548	0.00969063	3.78847	1.88919	6	28	negative regulation of cell death
									283	GO:0009611	0.0103422	2.09183	7.75916	15	115	response to wounding
									284	GO:0051174	0.011348	4.33813	1.41689	5	21	regulation of phosphorus metabolic process
									285	GO:0019220	0.011348	4.33813	1.41689	5	21	regulation of phosphate metabolic process
									286	GO:0019627	0.0130302	27.7032	0.202413	2	3	urea metabolic process
									287	GO:0016598	0.0130302	27.7032	0.202413	2	3	protein arginylation
									288	GO:0045116	0.0130302	27.7032	0.202413	2	3	protein neddylation
									289	GO:0034599	0.0130302	27.7032	0.202413	2	3	cellular response to oxidative stress
									290	GO:0006490	0.0130302	27.7032	0.202413	2	3	oligosaccharide-lipid intermediate biosynthetic process
									291	GO:0006488	0.0130302	27.7032	0.202413	2	3	dolichol-linked oligosaccharide biosynthetic process
									292	GO:0000280	0.0131164	1.97474	8.70376	16	129	nuclear division
									293	GO:0030488	0.0132609	8.31771	0.539768	3	8	tRNA methylation
									294	GO:0044763	0.0154212	1.21159	160.311	185	2376	single-organism cellular process
									295	GO:0019080	0.0154223	5.04431	1.01206	4	15	viral gene expression
									296	GO:0048285	0.0160851	1.92319	8.90617	16	132	organelle fission
									297	GO:0051128	0.0161054	2.16994	6.00492	12	89	regulation of cellular component organization
									298	GO:0009451	0.0164886	1.67705	15.1135	24	224	RNA modification
									299	GO:0051052	0.0167834	3.85548	1.55183	5	23	regulation of DNA metabolic process
									300	GO:0006368	0.018542	3.20457	2.15907	6	32	transcription elongation from RNA polymerase II promoter
									301	GO:0006289	0.020053	3.65226	1.6193	5	24	nucleotide-excision repair
									302	GO:0006354	0.0214077	3.08563	2.22654	6	33	DNA-templated transcription, elongation
									303	GO:0044257	0.0224511	1.88281	8.50134	15	126	cellular protein catabolic process
									304	GO:0051603	0.0224511	1.88281	8.50134	15	126	proteolysis involved in cellular protein catabolic process
									305	GO:0050896	0.0239145	1.20737	134.807	156	1998	response to stimulus
									306	GO:0010605	0.0239327	1.86584	8.56882	15	127	negative regulation of macromolecule metabolic process
									307	GO:0006106	0.0248974	13.8505	0.269884	2	4	fumarate metabolic process
									308	GO:1901068	0.0248974	13.8505	0.269884	2	4	guanosine-containing compound metabolic process
									309	GO:0006207	0.0248974	13.8505	0.269884	2	4	de novo' pyrimidine nucleobase biosynthetic process
									310	GO:0071985	0.0248974	13.8505	0.269884	2	4	multivesicular body sorting pathway
									311	GO:0046653	0.0248974	13.8505	0.269884	2	4	tetrahydrofolate metabolic process
									312	GO:0046654	0.0248974	13.8505	0.269884	2	4	tetrahydrofolate biosynthetic process
									313	GO:0000290	0.0248974	13.8505	0.269884	2	4	deadenylation-dependent decapping of nuclear-transcribed mRNA
									314	GO:0000288	0.0248974	13.8505	0.269884	2	4	nuclear-transcribed mRNA catabolic process, deadenylation-dependent decay
									315	GO:0006050	0.0248974	13.8505	0.269884	2	4	mannosamine metabolic process
									316	GO:0006051	0.0248974	13.8505	0.269884	2	4	N-acetylmannosamine metabolic process
									317	GO:0042278	0.0248974	13.8505	0.269884	2	4	purine nucleoside metabolic process
									318	GO:0046128	0.0248974	13.8505	0.269884	2	4	purine ribonucleoside metabolic process
									319	GO:0006399	0.0252169	1.46112	25.7064	36	381	tRNA metabolic process
									320	GO:0051172	0.0273404	2.41659	3.64343	8	54	negative regulation of nitrogen compound metabolic process
									321	GO:0045934	0.0280037	2.87235	2.36148	6	35	negative regulation of nucleobase-containing compound metabolic process
									322	GO:0009116	0.0280037	2.87235	2.36148	6	35	nucleoside metabolic process
									323	GO:1901657	0.0280037	2.87235	2.36148	6	35	glycosyl compound metabolic process
									324	GO:0019684	0.0294408	3.96241	1.21448	4	18	photosynthesis, light reaction
									325	GO:0008033	0.0305275	1.52702	18.4871	27	274	tRNA processing
									326	GO:0009892	0.0305988	1.80091	8.8387	15	131	negative regulation of metabolic process
									327	GO:0031324	0.0323466	2.19454	4.45309	9	66	negative regulation of cellular metabolic process
									328	GO:0035556	0.0380404	1.39561	28.2703	38	419	intracellular signal transduction
									329	GO:0006206	0.0396549	9.23288	0.337355	2	5	pyrimidine nucleobase metabolic process
									330	GO:0032775	0.0396549	9.23288	0.337355	2	5	DNA methylation on adenine
									331	GO:0019856	0.0396549	9.23288	0.337355	2	5	pyrimidine nucleobase biosynthetic process
									332	GO:0044265	0.040074	1.59307	13.1568	20	195	cellular macromolecule catabolic process
									333	GO:0006357	0.0414119	1.68783	9.98571	16	148	regulation of transcription from RNA polymerase II promoter
									334	GO:0015975	0.0419108	3.46653	1.34942	4	20	energy derivation by oxidation of reduced inorganic compounds
									335	GO:0015947	0.0419108	3.46653	1.34942	4	20	methane metabolic process
									336	GO:0015948	0.0419108	3.46653	1.34942	4	20	methanogenesis
									337	GO:0043112	0.0419108	3.46653	1.34942	4	20	receptor metabolic process
									338	GO:0044033	0.0419108	3.46653	1.34942	4	20	multi-organism metabolic process
									339	GO:0009061	0.0419108	3.46653	1.34942	4	20	anaerobic respiration
									340	GO:0043446	0.0419108	3.46653	1.34942	4	20	cellular alkane metabolic process
									341	GO:0043447	0.0419108	3.46653	1.34942	4	20	alkane biosynthetic process
									342	GO:0009057	0.0423141	1.48718	18.2172	26	270	macromolecule catabolic process
									343	GO:0031163	0.042565	4.61943	0.809652	3	12	metallo-sulfur cluster assembly
									344	GO:0016226	0.042565	4.61943	0.809652	3	12	iron-sulfur cluster assembly
									345	GO:0032446	0.0448522	2.31401	3.30608	7	49	protein modification by small protein conjugation
									346	GO:0070887	0.0448522	2.31401	3.30608	7	49	cellular response to chemical stimulus
									347	GO:0002098	0.0449018	2.52335	2.63137	6	39	tRNA wobble uridine modification
									348	GO:0071824	0.0461712	1.63266	10.9303	17	162	protein-DNA complex subunit organization
									349	GO:0006915	0.0473626	2.13669	4.04826	8	60	apoptotic process
									350	GO:0012501	0.0473626	2.13669	4.04826	8	60	programmed cell death
									351	GO:0008219	0.0473626	2.13669	4.04826	8	60	cell death
									352	GO:0009967	0.049102	3.26235	1.41689	4	21	positive regulation of signal transduction
									353	GO:0043648	0.049102	3.26235	1.41689	4	21	dicarboxylic acid metabolic process
									354	GO:0023056	0.049102	3.26235	1.41689	4	21	positive regulation of signaling
									355	GO:0010647	0.049102	3.26235	1.41689	4	21	positive regulation of cell communication
Cluster 4 Molecular function (MF)									Cluster 4 Biological process (BP)									Cluster 4 Cellular component (CC)
	GOMFID	Pvalue	OddsRatio	ExpCount	Count	Size	Term			GOBPID	Pvalue	OddsRatio	ExpCount	Count	Size	Term			GOCCID	Pvalue	OddsRatio	ExpCount	Count	Size	Term
1	GO:0004568	4.69e-10	43.1413	0.567439	9	14	chitinase activity		1	GO:0044036	1.12e-10	26.436	0.855299	11	21	cell wall macromolecule metabolic process		1	GO:0044424	1.99e-07	1.7179	211.697	261	4535	intracellular part
2	GO:0003676	3.56e-09	1.60468	194.105	264	4789	nucleic acid binding		2	GO:1903506	3.07e-10	2.14734	54.9427	102	1349	regulation of nucleic acid-templated transcription		2	GO:0005622	6.13e-07	1.684	217.999	265	4670	intracellular
3	GO:0046983	5.6e-07	2.98682	11.5109	31	284	protein dimerization activity		3	GO:0006355	3.07e-10	2.14734	54.9427	102	1349	regulation of transcription, DNA-templated		3	GO:0005623	1.41e-06	1.66806	230.136	275	4930	cell
4	GO:0098599	2.68e-06	Inf	0.162125	4	4	palmitoyl hydrolase activity		4	GO:2001141	3.63e-10	2.13972	55.1057	102	1353	regulation of RNA biosynthetic process		4	GO:0044464	1.41e-06	1.66806	230.136	275	4930	cell part
5	GO:0016758	2.82e-06	3.33549	7.70095	23	190	transferase activity, transferring hexosyl groups		5	GO:0051252	3.63e-10	2.13972	55.1057	102	1353	regulation of RNA metabolic process		5	GO:0043231	1.46e-06	1.63071	148.818	194	3188	intracellular membrane-bounded organelle
6	GO:0003677	5.73e-06	1.57765	92.9384	134	2293	DNA binding		6	GO:0019219	3.69e-10	2.13161	55.8795	103	1372	regulation of nucleobase-containing compound metabolic process		6	GO:0043227	1.56e-06	1.62682	152.786	198	3273	membrane-bounded organelle
7	GO:0008375	2.42e-05	10.4493	0.932221	7	23	acetylglucosaminyltransferase activity		7	GO:0051171	1.02e-09	2.08577	56.8977	103	1397	regulation of nitrogen compound metabolic process		7	GO:0030008	7.25e-06	20.7194	0.560169	6	12	TRAPP complex
8	GO:0004602	3.76e-05	47.6056	0.243188	4	6	glutathione peroxidase activity		8	GO:2000112	1.28e-09	2.08221	56.3682	102	1384	regulation of cellular macromolecule biosynthetic process		8	GO:0005634	5.43e-05	1.5213	121.09	157	2594	nucleus
9	GO:0016757	5.25e-05	2.59582	10.4571	25	258	transferase activity, transferring glycosyl groups		9	GO:0010556	1.5e-09	2.075	56.5312	102	1388	regulation of macromolecule biosynthetic process		9	GO:0043229	5.93e-05	1.49391	184.062	222	3943	intracellular organelle
10	GO:0004601	0.00016441	23.8	0.324251	4	8	peroxidase activity		10	GO:0031326	1.5e-09	2.075	56.5312	102	1388	regulation of cellular biosynthetic process		10	GO:0043226	0.00010249	1.4735	187.376	224	4014	organelle
11	GO:0008270	0.00016637	1.47014	89.1689	122	2200	zinc ion binding		11	GO:0009889	1.76e-09	2.06782	56.6941	102	1392	regulation of biosynthetic process		11	GO:0005783	0.00033279	2.51676	9.19611	21	197	endoplasmic reticulum
12	GO:0043565	0.00018882	2.32791	11.9973	26	296	sequence-specific DNA binding		12	GO:0016998	2.56e-09	30.788	0.651656	9	16	cell wall macromolecule catabolic process		12	GO:0048475	0.00043907	2.76675	6.81539	17	146	coated membrane
13	GO:0008194	0.00021608	5.00515	2.10763	9	52	UDP-glycosyltransferase activity		13	GO:0050794	2.66e-09	1.79253	112.166	169	2754	regulation of cellular process		13	GO:0030117	0.00043907	2.76675	6.81539	17	146	membrane coat
14	GO:0016278	0.00024247	8.41725	0.932221	6	23	lysine N-methyltransferase activity		14	GO:0080090	4.44e-09	2.01938	58.4454	103	1435	regulation of primary metabolic process		14	GO:0044432	0.00103406	2.72891	6.0685	15	130	endoplasmic reticulum part
15	GO:0016279	0.00024247	8.41725	0.932221	6	23	protein-lysine N-methyltransferase activity		15	GO:0031323	5.16e-09	2.01262	58.6083	103	1439	regulation of cellular metabolic process		15	GO:0005685	0.00118786	11.7781	0.513488	4	11	U1 snRNP
16	GO:0042054	0.00024247	8.41725	0.932221	6	23	histone methyltransferase activity		16	GO:0007267	1.19e-08	10.1002	1.79205	13	44	cell-cell signaling		16	GO:0012505	0.00154177	1.85366	19.1858	33	411	endomembrane system
17	GO:0018024	0.00024247	8.41725	0.932221	6	23	histone-lysine N-methyltransferase activity		17	GO:0010468	1.26e-08	1.97846	58.812	102	1444	regulation of gene expression		17	GO:0034998	0.00217387	Inf	0.0933615	2	2	oligosaccharyltransferase I complex
18	GO:0000988	0.00028132	2.40215	10.295	23	254	transcription factor activity, protein binding		18	GO:1901072	1.85e-08	21.5464	0.773842	9	19	glucosamine-containing compound catabolic process		18	GO:0016592	0.00244117	2.68358	5.3216	13	114	mediator complex
19	GO:0005102	0.00029142	2.34536	10.984	24	271	receptor binding		19	GO:0006032	1.85e-08	21.5464	0.773842	9	19	chitin catabolic process		19	GO:0005885	0.00322258	8.24162	0.65353	4	14	Arp2/3 protein complex
20	GO:0016775	0.00029643	6.4265	1.33753	7	33	phosphotransferase activity, nitrogenous group as acceptor		20	GO:0046348	1.85e-08	21.5464	0.773842	9	19	amino sugar catabolic process		20	GO:0097525	0.00423444	7.49146	0.700211	4	15	spliceosomal snRNP complex
21	GO:0004673	0.00029643	6.4265	1.33753	7	33	protein histidine kinase activity		21	GO:0050789	2.34e-08	1.7224	116.321	170	2856	regulation of biological process		21	GO:0030532	0.00423444	7.49146	0.700211	4	15	small nuclear ribonucleoprotein complex
22	GO:0000989	0.00029736	2.57594	8.38999	20	207	transcription factor activity, transcription factor binding		22	GO:0060255	3.13e-08	1.93131	60.6447	103	1489	regulation of macromolecule metabolic process		22	GO:1905368	0.00466958	2.37276	6.39526	14	137	peptidase complex
23	GO:0003712	0.00029736	2.57594	8.38999	20	207	transcription cofactor activity		23	GO:0071554	3.95e-08	12.0048	1.34404	11	33	cell wall organization or biogenesis		23	GO:0044444	0.00487025	1.42037	60.825	80	1303	cytoplasmic part
24	GO:0042287	0.00046211	15.8648	0.405313	4	10	MHC protein binding		24	GO:0019222	9.26e-08	1.88228	61.9481	103	1521	regulation of metabolic process		24	GO:0005789	0.00543618	2.4167	5.83509	13	125	endoplasmic reticulum membrane
25	GO:0042289	0.00046211	15.8648	0.405313	4	10	MHC class II protein binding		25	GO:0006351	3.25e-07	1.76676	75.0219	117	1842	transcription, DNA-templated		25	GO:0005787	0.00544071	6.86633	0.746892	4	16	signal peptidase complex
26	GO:0004579	0.00062365	35.654	0.202657	3	5	dolichyl-diphosphooligosaccharide-protein glycotransferase activity		26	GO:0097659	3.25e-07	1.76676	75.0219	117	1842	nucleic acid-templated transcription		26	GO:0070176	0.00631963	41.0455	0.140042	2	3	DRM complex
27	GO:0016715	0.00070295	13.5976	0.445845	4	11	oxidoreductase activity, acting on paired donors, with incorporation or reduction of molecular oxygen, reduced ascorbate as one donor, and incorporation of one atom of oxygen		27	GO:0016055	3.28e-07	13.4601	1.01821	9	25	Wnt signaling pathway		27	GO:0090568	0.00631963	41.0455	0.140042	2	3	nuclear transcriptional repressor complex
28	GO:0008276	0.0007613	6.50231	1.13488	6	28	protein methyltransferase activity		28	GO:0198738	3.28e-07	13.4601	1.01821	9	25	cell-cell signaling by wnt		28	GO:0090571	0.00631963	41.0455	0.140042	2	3	RNA polymerase II transcription repressor complex
29	GO:1901363	0.00078723	1.28092	273.992	315	6760	heterocyclic compound binding		29	GO:1905114	3.28e-07	13.4601	1.01821	9	25	cell surface receptor signaling pathway involved in cell-cell signaling		29	GO:0042175	0.00662888	2.35277	5.97513	13	128	nuclear outer membrane-endoplasmic reticulum membrane network
30	GO:0097159	0.00081368	1.27996	274.113	315	6763	organic cyclic compound binding		30	GO:0007166	4.37e-07	5.36576	3.58411	16	88	cell surface receptor signaling pathway		30	GO:0005737	0.0093869	1.34475	77.0232	96	1650	cytoplasm
31	GO:0008083	0.0010115	5.06121	1.62125	7	40	growth factor activity		31	GO:0032774	4.85e-07	1.75026	75.5921	117	1856	RNA biosynthetic process		31	GO:0030014	0.0122493	20.5202	0.186723	2	4	CCR4-NOT complex
32	GO:0019904	0.00102074	11.8972	0.486376	4	12	protein domain specific binding		32	GO:0065007	1.56e-06	1.58407	125.322	172	3077	biological regulation		32	GO:0000124	0.0128165	2.58869	3.78114	9	81	SAGA complex
33	GO:0017176	0.00102074	11.8972	0.486376	4	12	phosphatidylinositol N-acetylglucosaminyltransferase activity		33	GO:0006026	7.88e-06	8.27647	1.4255	9	35	aminoglycan catabolic process		33	GO:0005829	0.0148824	4.84383	0.980296	4	21	cytosol
34	GO:0008736	0.00164058	Inf	0.0810627	2	2	L-fucose isomerase activity		34	GO:0034654	1.62e-05	1.59926	82.0272	118	2014	nucleobase-containing compound biosynthetic process		34	GO:0031082	0.0148824	4.84383	0.980296	4	21	BLOC complex
35	GO:0004392	0.00164058	Inf	0.0810627	2	2	heme oxygenase (decyclizing) activity		35	GO:0043161	1.79e-05	11.125	0.896027	7	22	proteasome-mediated ubiquitin-dependent protein catabolic process		35	GO:0031083	0.0148824	4.84383	0.980296	4	21	BLOC-1 complex
36	GO:0003856	0.00164058	Inf	0.0810627	2	2	3-dehydroquinate synthase activity		36	GO:0019438	2.05e-05	1.58164	85.0411	121	2088	aromatic compound biosynthetic process		36	GO:0044445	0.0148824	4.84383	0.980296	4	21	cytosolic part
37	GO:0003830	0.00164058	Inf	0.0810627	2	2	beta-1,4-mannosylglycoprotein 4-beta-N-acetylglucosaminyltransferase activity		37	GO:0034645	2.13e-05	1.52257	111.596	151	2740	cellular macromolecule biosynthetic process		37	GO:0070461	0.0171994	2.45122	3.96786	9	85	SAGA-type complex
38	GO:0005094	0.00164058	Inf	0.0810627	2	2	Rho GDP-dissociation inhibitor activity		38	GO:0009059	3.1e-05	1.50858	112.37	151	2759	macromolecule biosynthetic process		38	GO:0019031	0.019716	1.8248	9.84964	17	211	viral envelope
39	GO:0004489	0.00164058	Inf	0.0810627	2	2	methylenetetrahydrofolate reductase (NAD(P)H) activity		39	GO:0044249	3.16e-05	1.4828	130.576	171	3206	cellular biosynthetic process		39	GO:0005788	0.0197882	13.6785	0.233404	2	5	endoplasmic reticulum lumen
40	GO:0008430	0.00164058	Inf	0.0810627	2	2	selenium binding		40	GO:1901362	3.18e-05	1.55179	90.2136	126	2215	organic cyclic compound biosynthetic process		40	GO:0008250	0.0197882	13.6785	0.233404	2	5	oligosaccharyltransferase complex
41	GO:0008193	0.00164058	Inf	0.0810627	2	2	tRNA guanylyltransferase activity		41	GO:0010498	3.38e-05	9.81464	0.977484	7	24	proteasomal protein catabolic process		41	GO:0036338	0.0222974	1.79633	9.98968	17	214	viral membrane
42	GO:0050694	0.00164058	Inf	0.0810627	2	2	galactose 3-O-sulfotransferase activity		42	GO:0006487	3.82e-05	47.4563	0.244371	4	6	protein N-linked glycosylation		42	GO:0042597	0.0271791	3.91927	1.16702	4	25	periplasmic space
43	GO:0001733	0.00164058	Inf	0.0810627	2	2	galactosylceramide sulfotransferase activity		43	GO:0018130	4.18e-05	1.55348	85.4891	120	2099	heterocycle biosynthetic process		43	GO:0032580	0.0287739	10.2576	0.280084	2	6	Golgi cisterna membrane
44	GO:0046872	0.00192864	1.30754	140.765	172	3473	metal ion binding		44	GO:0009987	5.61e-05	1.43825	315.239	358	7740	cellular process		44	GO:0031985	0.0287739	10.2576	0.280084	2	6	Golgi cisterna
45	GO:0043169	0.00283916	1.29242	142.022	172	3504	cation binding		45	GO:0007275	6.48e-05	3.27619	5.78345	17	142	multicellular organism development		45	GO:0009317	0.0287739	10.2576	0.280084	2	6	acetyl-CoA carboxylase complex
46	GO:0004523	0.00340261	3.97454	1.98604	7	49	RNA-DNA hybrid ribonuclease activity		46	GO:0044237	7.09e-05	1.40736	233.741	277	5739	cellular metabolic process		46	GO:1990071	0.0287739	10.2576	0.280084	2	6	TRAPPII protein complex
47	GO:0046914	0.00418498	1.30866	109.07	135	2691	transition metal ion binding		47	GO:0044260	7.75e-05	1.41124	193.949	236	4762	cellular macromolecule metabolic process		47	GO:0031248	0.0308998	2.18923	4.38799	9	94	protein acetyltransferase complex
48	GO:0008170	0.00581725	4.08402	1.66178	6	41	N-methyltransferase activity		48	GO:1901576	9.84e-05	1.43849	136.888	175	3361	organic substance biosynthetic process		48	GO:1902493	0.0308998	2.18923	4.38799	9	94	acetyltransferase complex
49	GO:0019199	0.00637659	6.34254	0.770095	4	19	transmembrane receptor protein kinase activity		49	GO:0010033	0.00010326	4.98197	2.36225	10	58	response to organic substance		49	GO:0000123	0.0308998	2.18923	4.38799	9	94	histone acetyltransferase complex
50	GO:0004576	0.00642577	10.1838	0.405313	3	10	oligosaccharyl transferase activity		50	GO:0016070	0.00011446	1.47236	106.179	141	2607	RNA metabolic process		50	GO:0099023	0.0324813	2.29516	3.73446	8	80	tethering complex
51	GO:0000155	0.00662144	4.76079	1.21594	5	30	phosphorelay sensor kinase activity		51	GO:0000160	0.00017438	5.96312	1.62914	8	40	phosphorelay signal transduction system		51	GO:0033588	0.0350646	3.57758	1.26038	4	27	Elongator holoenzyme complex
52	GO:0003729	0.00771913	5.94577	0.810627	4	20	mRNA binding		52	GO:0009101	0.00021224	4.11275	3.05464	11	75	glycoprotein biosynthetic process
53	GO:0005488	0.00913709	1.22394	485.971	515	11990	binding		53	GO:0006486	0.00021224	4.11275	3.05464	11	75	protein glycosylation
54	GO:0016684	0.00923485	5.59569	0.851158	4	21	oxidoreductase activity, acting on peroxide as acceptor		54	GO:0043413	0.00021224	4.11275	3.05464	11	75	macromolecule glycosylation
55	GO:0015109	0.00932099	23.736	0.162125	2	4	chromate transmembrane transporter activity		55	GO:0060070	0.00026061	71.055	0.162914	3	4	canonical Wnt signaling pathway
56	GO:0003810	0.00932099	23.736	0.162125	2	4	protein-glutamine gamma-glutamyltransferase activity		56	GO:0030177	0.00026061	71.055	0.162914	3	4	positive regulation of Wnt signaling pathway
57	GO:0004605	0.00932099	23.736	0.162125	2	4	phosphatidate cytidylyltransferase activity		57	GO:0007178	0.00026061	71.055	0.162914	3	4	transmembrane receptor protein serine/threonine kinase signaling pathway
58	GO:0043531	0.0104443	3.14758	2.43188	7	60	ADP binding		58	GO:0007179	0.00026061	71.055	0.162914	3	4	transforming growth factor beta receptor signaling pathway
59	GO:0004866	0.0108165	2.84724	3.03985	8	75	endopeptidase inhibitor activity		59	GO:0090101	0.00026061	71.055	0.162914	3	4	negative regulation of transmembrane receptor protein serine/threonine kinase signaling pathway
60	GO:0061135	0.0108165	2.84724	3.03985	8	75	endopeptidase regulator activity		60	GO:0090263	0.00026061	71.055	0.162914	3	4	positive regulation of canonical Wnt signaling pathway
61	GO:0046915	0.0137861	3.32263	1.98604	6	49	transition metal ion transmembrane transporter activity		61	GO:0090287	0.00026061	71.055	0.162914	3	4	regulation of cellular response to growth factor stimulus
62	GO:0003755	0.0143589	3.83798	1.45913	5	36	peptidyl-prolyl cis-trans isomerase activity		62	GO:0090288	0.00026061	71.055	0.162914	3	4	negative regulation of cellular response to growth factor stimulus
63	GO:0016859	0.0143589	3.83798	1.45913	5	36	cis-trans isomerase activity		63	GO:0030512	0.00026061	71.055	0.162914	3	4	negative regulation of transforming growth factor beta receptor signaling pathway
64	GO:0016838	0.0151192	15.823	0.202657	2	5	carbon-oxygen lyase activity, acting on phosphates		64	GO:1903844	0.00026061	71.055	0.162914	3	4	regulation of cellular response to transforming growth factor beta stimulus
65	GO:0005092	0.0151192	15.823	0.202657	2	5	GDP-dissociation inhibitor activity		65	GO:1903845	0.00026061	71.055	0.162914	3	4	negative regulation of cellular response to transforming growth factor beta stimulus
66	GO:0008134	0.0160038	1.858	9.5654	17	236	transcription factor binding		66	GO:0017015	0.00026061	71.055	0.162914	3	4	regulation of transforming growth factor beta receptor signaling pathway
67	GO:0004867	0.0171807	4.52877	1.01328	4	25	serine-type endopeptidase inhibitor activity		67	GO:0060828	0.00026061	71.055	0.162914	3	4	regulation of canonical Wnt signaling pathway
68	GO:0016755	0.0171807	4.52877	1.01328	4	25	transferase activity, transferring amino-acyl groups		68	GO:0071560	0.00026061	71.055	0.162914	3	4	cellular response to transforming growth factor beta stimulus
69	GO:0004675	0.0172744	6.47909	0.567439	3	14	transmembrane receptor protein serine/threonine kinase activity		69	GO:0071559	0.00026061	71.055	0.162914	3	4	response to transforming growth factor beta
70	GO:0008757	0.0199038	2.73348	2.75613	7	68	S-adenosylmethionine-dependent methyltransferase activity		70	GO:0090092	0.00026061	71.055	0.162914	3	4	regulation of transmembrane receptor protein serine/threonine kinase signaling pathway
71	GO:0090729	0.022074	11.8666	0.243188	2	6	toxin activity		71	GO:0070085	0.00026904	3.98748	3.13609	11	77	glycosylation
72	GO:0004869	0.022074	11.8666	0.243188	2	6	cysteine-type endopeptidase inhibitor activity		72	GO:0009100	0.00026904	3.98748	3.13609	11	77	glycoprotein metabolic process
73	GO:0008883	0.022074	11.8666	0.243188	2	6	glutamyl-tRNA reductase activity		73	GO:0010467	0.00028604	1.41184	126.584	161	3108	gene expression
74	GO:0008376	0.022074	11.8666	0.243188	2	6	acetylgalactosaminyltransferase activity		74	GO:0035966	0.00029109	18.9779	0.366557	4	9	response to topologically incorrect protein
75	GO:0008192	0.022074	11.8666	0.243188	2	6	RNA guanylyltransferase activity		75	GO:0098586	0.00029109	18.9779	0.366557	4	9	cellular response to virus
76	GO:0070568	0.022074	11.8666	0.243188	2	6	guanylyltransferase activity		76	GO:0009271	0.00029109	18.9779	0.366557	4	9	phage shock
77	GO:0030414	0.0246529	2.41302	3.52623	8	87	peptidase inhibitor activity		77	GO:1901565	0.00030194	3.92765	3.17682	11	78	organonitrogen compound catabolic process
78	GO:0061134	0.0246529	2.41302	3.52623	8	87	peptidase regulator activity		78	GO:1901136	0.00039491	4.57075	2.2808	9	56	carbohydrate derivative catabolic process
79	GO:0016891	0.0263709	2.56466	2.91826	7	72	endoribonuclease activity, producing 5'-phosphomonoesters		79	GO:0071310	0.0004774	5.01916	1.87351	8	46	cellular response to organic substance
80	GO:0003700	0.0298369	1.4965	20.0225	29	494	transcription factor activity, sequence-specific DNA binding		80	GO:0044707	0.00050081	2.30439	10.7523	23	264	single-multicellular organism process
81	GO:0001071	0.0298369	1.4965	20.0225	29	494	nucleic acid binding transcription factor activity		81	GO:0009058	0.00050373	1.37653	142.957	177	3510	biosynthetic process
82	GO:0003989	0.0300823	9.4927	0.283719	2	7	acetyl-CoA carboxylase activity		82	GO:0044767	0.00071223	2.28688	10.345	22	254	single-organism developmental process
83	GO:0016885	0.0300823	9.4927	0.283719	2	7	ligase activity, forming carbon-carbon bonds		83	GO:0006376	0.00071422	13.5535	0.448014	4	11	mRNA splice site selection
84	GO:0019905	0.0300823	9.4927	0.283719	2	7	syntaxin binding		84	GO:0070887	0.00074136	4.65078	1.9957	8	49	cellular response to chemical stimulus
85	GO:0016421	0.0300823	9.4927	0.283719	2	7	CoA carboxylase activity		85	GO:0022618	0.0007951	8.48231	0.773842	5	19	ribonucleoprotein complex assembly
86	GO:0000149	0.0300823	9.4927	0.283719	2	7	SNARE binding		86	GO:0044271	0.00094146	1.39278	104.835	134	2574	cellular nitrogen compound biosynthetic process
87	GO:0004857	0.0337642	2.03781	5.14748	10	127	enzyme inhibitor activity		87	GO:0051641	0.00096817	1.75674	25.4553	42	625	cellular localization
88	GO:0031419	0.0390475	7.91011	0.324251	2	8	cobalamin binding		88	GO:0009615	0.00097478	4.43375	2.07715	8	51	response to virus
89	GO:0004882	0.0396039	4.45306	0.770095	3	19	androgen receptor activity		89	GO:0071826	0.00102496	7.91619	0.81457	5	20	ribonucleoprotein complex subunit organization
90	GO:0004879	0.0396039	4.45306	0.770095	3	19	RNA polymerase II transcription factor activity, ligand-activated sequence-specific DNA binding		90	GO:0016485	0.00103323	2.70458	6.02782	15	148	protein processing
91	GO:0098531	0.0396039	4.45306	0.770095	3	19	transcription factor activity, direct ligand regulated sequence-specific DNA binding		91	GO:0007167	0.001037	11.8584	0.488742	4	12	enzyme linked receptor protein signaling pathway
92	GO:0008817	0.0405313	Inf	0.0405313	1	1	cob(I)yrinic acid a,c-diamide adenosyltransferase activity		92	GO:0019882	0.001037	11.8584	0.488742	4	12	antigen processing and presentation
93	GO:0004366	0.0405313	Inf	0.0405313	1	1	glycerol-3-phosphate O-acyltransferase activity		93	GO:0090304	0.00137597	1.34211	139.251	170	3419	nucleic acid metabolic process
94	GO:0005164	0.0405313	Inf	0.0405313	1	1	tumor necrosis factor receptor binding		94	GO:0000245	0.00144996	10.5399	0.529471	4	13	spliceosomal complex assembly
95	GO:0032813	0.0405313	Inf	0.0405313	1	1	tumor necrosis factor receptor superfamily binding		95	GO:0009057	0.00158097	2.13654	10.9967	22	270	macromolecule catabolic process
96	GO:0005496	0.0452306	4.19087	0.810627	3	20	steroid binding		96	GO:0006788	0.00165581	Inf	0.081457	2	2	heme oxidation
97	GO:0003707	0.0452306	4.19087	0.810627	3	20	steroid hormone receptor activity		97	GO:0007423	0.00165581	Inf	0.081457	2	2	sensory organ development
98	GO:0004064	0.0452306	4.19087	0.810627	3	20	arylesterase activity		98	GO:0006004	0.00165581	Inf	0.081457	2	2	fucose metabolic process
99	GO:0005515	0.0455189	1.16229	173.393	193	4278	protein binding		99	GO:0032502	0.00173615	2.1191	11.0782	22	272	developmental process
100	GO:0004521	0.0484154	2.22139	3.32357	7	82	endoribonuclease activity		100	GO:0048856	0.00176272	2.20633	9.69338	20	238	anatomical structure development
101	GO:0008982	0.0488791	6.7797	0.364782	2	9	protein-N(PI)-phosphohistidine-sugar phosphotransferase activity		101	GO:0071495	0.00192223	5.28244	1.34404	6	33	cellular response to endogenous stimulus
102	GO:0004652	0.0488791	6.7797	0.364782	2	9	polynucleotide adenylyltransferase activity		102	GO:0044089	0.0019651	9.48517	0.570199	4	14	positive regulation of cellular component biogenesis
103	GO:0009001	0.0488791	6.7797	0.364782	2	9	serine O-acetyltransferase activity		103	GO:0034314	0.0019651	9.48517	0.570199	4	14	Arp2/3 complex-mediated actin nucleation
104	GO:0016412	0.0488791	6.7797	0.364782	2	9	serine O-acyltransferase activity		104	GO:0051495	0.0019651	9.48517	0.570199	4	14	positive regulation of cytoskeleton organization
									105	GO:0030838	0.0019651	9.48517	0.570199	4	14	positive regulation of actin filament polymerization
									106	GO:0010638	0.0019651	9.48517	0.570199	4	14	positive regulation of organelle organization
									107	GO:0032273	0.0019651	9.48517	0.570199	4	14	positive regulation of protein polymerization
									108	GO:1902905	0.0019651	9.48517	0.570199	4	14	positive regulation of supramolecular fiber organization
									109	GO:0000096	0.0019651	9.48517	0.570199	4	14	sulfur amino acid metabolic process
									110	GO:0045010	0.0019651	9.48517	0.570199	4	14	actin nucleation
									111	GO:0031334	0.0019651	9.48517	0.570199	4	14	positive regulation of protein complex assembly
									112	GO:0046907	0.00198531	1.73165	23.256	38	571	intracellular transport
									113	GO:0071363	0.00207957	17.7595	0.2851	3	7	cellular response to growth factor stimulus
									114	GO:0070848	0.00207957	17.7595	0.2851	3	7	response to growth factor
									115	GO:0070727	0.00224229	1.71817	23.4189	38	575	cellular macromolecule localization
									116	GO:0034613	0.00224229	1.71817	23.4189	38	575	cellular protein localization
									117	GO:0051649	0.00231086	1.71484	23.4596	38	576	establishment of localization in cell
									118	GO:0016192	0.00236318	1.88367	15.7619	28	387	vesicle-mediated transport
									119	GO:0009719	0.00262975	4.91735	1.4255	6	35	response to endogenous stimulus
									120	GO:0008104	0.00272639	1.63225	28.51	44	700	protein localization
									121	GO:0071103	0.00305508	2.48165	6.06855	14	149	DNA conformation change
									122	GO:0022900	0.00308512	4.06165	1.95497	7	48	electron transport chain
									123	GO:0030111	0.00322705	14.2065	0.325828	3	8	regulation of Wnt signaling pathway
									124	GO:0045184	0.00327615	1.6329	27.1659	42	667	establishment of protein localization
									125	GO:0006465	0.00334874	7.90304	0.651656	4	16	signal peptide processing
									126	GO:0045226	0.00483304	47.2803	0.122186	2	3	extracellular polysaccharide biosynthetic process
									127	GO:0045227	0.00483304	47.2803	0.122186	2	3	capsule polysaccharide biosynthetic process
									128	GO:0045230	0.00483304	47.2803	0.122186	2	3	capsule organization
									129	GO:0018106	0.00483304	47.2803	0.122186	2	3	peptidyl-histidine phosphorylation
									130	GO:0046379	0.00483304	47.2803	0.122186	2	3	extracellular polysaccharide metabolic process
									131	GO:0018202	0.00483304	47.2803	0.122186	2	3	peptidyl-histidine modification
									132	GO:0071816	0.00483304	47.2803	0.122186	2	3	tail-anchored membrane protein insertion into ER membrane
									133	GO:0045048	0.00483304	47.2803	0.122186	2	3	protein insertion into ER membrane
									134	GO:0051180	0.00527807	6.77295	0.733113	4	18	vitamin transport
									135	GO:0051130	0.00527807	6.77295	0.733113	4	18	positive regulation of cellular component organization
									136	GO:0006323	0.00562406	2.49146	5.17252	12	127	DNA packaging
									137	GO:0031497	0.00601131	2.93666	3.33974	9	82	chromatin assembly
									138	GO:0006334	0.00601131	2.93666	3.33974	9	82	nucleosome assembly
									139	GO:0031145	0.00650595	10.1458	0.407285	3	10	anaphase-promoting complex-dependent catabolic process
									140	GO:0006886	0.00661069	1.64283	21.749	34	534	intracellular protein transport
									141	GO:0006357	0.00742687	2.29994	6.02782	13	148	regulation of transcription from RNA polymerase II promoter
									142	GO:0048585	0.00783567	5.92538	0.81457	4	20	negative regulation of response to stimulus
									143	GO:0015031	0.00804947	1.55666	26.9623	40	662	protein transport
									144	GO:0065004	0.00806543	2.36676	5.41689	12	133	protein-DNA complex assembly
									145	GO:0006333	0.00818102	2.78321	3.50265	9	86	chromatin assembly or disassembly
									146	GO:0034622	0.00862048	1.73225	15.7619	26	387	cellular macromolecular complex assembly
									147	GO:0015833	0.00886034	1.5462	27.1252	40	666	peptide transport
									148	GO:0042886	0.00886034	1.5462	27.1252	40	666	amide transport
									149	GO:0007219	0.00937331	5.57638	0.855299	4	21	Notch signaling pathway
									150	GO:0006979	0.00937331	5.57638	0.855299	4	21	response to oxidative stress
									151	GO:0015919	0.00940546	23.6383	0.162914	2	4	peroxisomal membrane transport
									152	GO:0032048	0.00940546	23.6383	0.162914	2	4	cardiolipin metabolic process
									153	GO:0032049	0.00940546	23.6383	0.162914	2	4	cardiolipin biosynthetic process
									154	GO:0006743	0.00940546	23.6383	0.162914	2	4	ubiquinone metabolic process
									155	GO:0006744	0.00940546	23.6383	0.162914	2	4	ubiquinone biosynthetic process
									156	GO:0006555	0.00940546	23.6383	0.162914	2	4	methionine metabolic process
									157	GO:0006655	0.00940546	23.6383	0.162914	2	4	phosphatidylglycerol biosynthetic process
									158	GO:0015703	0.00940546	23.6383	0.162914	2	4	chromate transport
									159	GO:0015889	0.00940546	23.6383	0.162914	2	4	cobalamin transport
									160	GO:0006986	0.00940546	23.6383	0.162914	2	4	response to unfolded protein
									161	GO:0046471	0.00940546	23.6383	0.162914	2	4	phosphatidylglycerol metabolic process
									162	GO:0045046	0.00940546	23.6383	0.162914	2	4	protein import into peroxisome membrane
									163	GO:0044763	0.00983077	1.29695	96.7709	118	2376	single-organism cellular process
									164	GO:0042221	0.0102201	2.201	6.27219	13	154	response to chemical
									165	GO:0044248	0.0106969	1.60683	20.853	32	512	cellular catabolic process
									166	GO:0006888	0.0116314	3.08062	2.48444	7	61	ER to Golgi vesicle-mediated transport
									167	GO:0007154	0.0121916	1.38418	49.2815	65	1210	cell communication
									168	GO:0071705	0.0128005	1.47694	31.1573	44	765	nitrogen compound transport
									169	GO:0044093	0.013007	4.98859	0.936756	4	23	positive regulation of molecular function
									170	GO:0043254	0.013007	4.98859	0.936756	4	23	regulation of protein complex assembly
									171	GO:0032956	0.013007	4.98859	0.936756	4	23	regulation of actin cytoskeleton organization
									172	GO:0032970	0.013007	4.98859	0.936756	4	23	regulation of actin filament-based process
									173	GO:0008064	0.013007	4.98859	0.936756	4	23	regulation of actin polymerization or depolymerization
									174	GO:0030832	0.013007	4.98859	0.936756	4	23	regulation of actin filament length
									175	GO:0030833	0.013007	4.98859	0.936756	4	23	regulation of actin filament polymerization
									176	GO:0032271	0.013007	4.98859	0.936756	4	23	regulation of protein polymerization
									177	GO:1902903	0.013007	4.98859	0.936756	4	23	regulation of supramolecular fiber organization
									178	GO:0030041	0.013007	4.98859	0.936756	4	23	actin filament polymerization
									179	GO:0008154	0.013007	4.98859	0.936756	4	23	actin polymerization or depolymerization
									180	GO:0032535	0.013007	4.98859	0.936756	4	23	regulation of cellular component size
									181	GO:0090066	0.013007	4.98859	0.936756	4	23	regulation of anatomical structure size
									182	GO:0044257	0.0137843	2.27943	5.13179	11	126	cellular protein catabolic process
									183	GO:0051603	0.0137843	2.27943	5.13179	11	126	proteolysis involved in cellular protein catabolic process
									184	GO:0019941	0.0150309	2.35758	4.52086	10	111	modification-dependent protein catabolic process
									185	GO:0006511	0.0150309	2.35758	4.52086	10	111	ubiquitin-dependent protein catabolic process
									186	GO:0043632	0.0150309	2.35758	4.52086	10	111	modification-dependent macromolecule catabolic process
									187	GO:0071630	0.0152546	15.7576	0.203643	2	5	ubiquitin-dependent catabolism of misfolded proteins by nucleus-associated proteasome
									188	GO:0044038	0.0152546	15.7576	0.203643	2	5	cell wall macromolecule biosynthetic process
									189	GO:0035967	0.0152546	15.7576	0.203643	2	5	cellular response to topologically incorrect protein
									190	GO:0031144	0.0152546	15.7576	0.203643	2	5	proteasome localization
									191	GO:0006515	0.0152546	15.7576	0.203643	2	5	misfolded or incompletely synthesized protein catabolic process
									192	GO:0051205	0.0152546	15.7576	0.203643	2	5	protein insertion into membrane
									193	GO:0018149	0.0152546	15.7576	0.203643	2	5	peptide cross-linking
									194	GO:0071218	0.0152546	15.7576	0.203643	2	5	cellular response to misfolded protein
									195	GO:0051788	0.0152546	15.7576	0.203643	2	5	response to misfolded protein
									196	GO:0030908	0.0152546	15.7576	0.203643	2	5	protein splicing
									197	GO:0070589	0.0152546	15.7576	0.203643	2	5	cellular component macromolecule biosynthetic process
									198	GO:0044700	0.0155232	1.37136	48.1004	63	1181	single organism signaling
									199	GO:0033036	0.0156669	1.43834	34.1305	47	838	macromolecule localization
									200	GO:0006366	0.0160182	1.69172	14.2142	23	349	transcription from RNA polymerase II promoter
									201	GO:0000278	0.01618	2.46131	3.90994	9	96	mitotic cell cycle
									202	GO:0023052	0.0168514	1.36465	48.304	63	1186	signaling
									203	GO:0009968	0.0174824	6.45437	0.570199	3	14	negative regulation of signal transduction
									204	GO:0023057	0.0174824	6.45437	0.570199	3	14	negative regulation of signaling
									205	GO:0010648	0.0174824	6.45437	0.570199	3	14	negative regulation of cell communication
									206	GO:0006139	0.0186094	1.22627	150.125	172	3686	nucleobase-containing compound metabolic process
									207	GO:1901137	0.0192504	1.72804	12.0964	20	297	carbohydrate derivative biosynthetic process
									208	GO:0065003	0.0216955	1.55968	18.6944	28	459	macromolecular complex assembly
									209	GO:0048513	0.0222692	11.8172	0.244371	2	6	animal organ development
									210	GO:0034453	0.0222692	11.8172	0.244371	2	6	microtubule anchoring
									211	GO:0043574	0.0222692	11.8172	0.244371	2	6	peroxisomal transport
									212	GO:0072662	0.0222692	11.8172	0.244371	2	6	protein localization to peroxisome
									213	GO:0072663	0.0222692	11.8172	0.244371	2	6	establishment of protein localization to peroxisome
									214	GO:0006625	0.0222692	11.8172	0.244371	2	6	protein targeting to peroxisome
									215	GO:0034629	0.0222692	11.8172	0.244371	2	6	cellular protein complex localization
									216	GO:0007007	0.0226907	4.11969	1.09967	4	27	inner mitochondrial membrane organization
									217	GO:0042407	0.0226907	4.11969	1.09967	4	27	cristae formation
									218	GO:0006650	0.0234339	2.63862	2.851	7	70	glycerophospholipid metabolic process
									219	GO:0006725	0.0239861	1.21258	154.076	175	3783	cellular aromatic compound metabolic process
									220	GO:0007156	0.0246087	3.29286	1.66987	5	41	homophilic cell adhesion via plasma membrane adhesion molecules
									221	GO:0046486	0.0251195	2.59719	2.89172	7	71	glycerolipid metabolic process
									222	GO:0098742	0.0270307	3.2036	1.7106	5	42	cell-cell adhesion via plasma-membrane adhesion molecules
									223	GO:0030163	0.0278385	2.02975	5.70199	11	140	protein catabolic process
									224	GO:0006807	0.0278673	1.19566	187.758	209	4610	nitrogen compound metabolic process
									225	GO:1901360	0.0281488	1.20315	158.638	179	3895	organic cyclic compound metabolic process
									226	GO:0002376	0.0285454	2.10517	5.00961	10	123	immune system process
									227	GO:0007006	0.0288191	3.78951	1.18113	4	29	mitochondrial membrane organization
									228	GO:0044087	0.0288191	3.78951	1.18113	4	29	regulation of cellular component biogenesis
									229	GO:0061024	0.0291339	2.01398	5.74272	11	141	membrane organization
									230	GO:0009306	0.0295992	3.11905	1.75133	5	43	protein secretion
									231	GO:0002790	0.0295992	3.11905	1.75133	5	43	peptide secretion
									232	GO:0000041	0.0299932	2.7373	2.36225	6	58	transition metal ion transport
									233	GO:0031503	0.0303451	9.45303	0.2851	2	7	protein complex localization
									234	GO:0009403	0.0303451	9.45303	0.2851	2	7	toxin biosynthetic process
									235	GO:1901642	0.0303451	9.45303	0.2851	2	7	nucleoside transmembrane transport
									236	GO:0071824	0.0331255	1.90471	6.59802	12	162	protein-DNA complex subunit organization
									237	GO:0046483	0.0335649	1.1962	153.628	173	3772	heterocycle metabolic process
									238	GO:0007283	0.0347562	4.73169	0.733113	3	18	spermatogenesis
									239	GO:0048232	0.0347562	4.73169	0.733113	3	18	male gamete generation
									240	GO:1902589	0.035633	1.74445	8.96027	15	220	single-organism organelle organization
									241	GO:0034728	0.0371949	2.09682	4.52086	9	111	nucleosome organization
									242	GO:0009605	0.0373598	1.86691	6.7202	12	165	response to external stimulus
									243	GO:0098609	0.0382051	2.89013	1.87351	5	46	cell-cell adhesion
									244	GO:0048522	0.0390534	2.07629	4.56159	9	112	positive regulation of cellular process
									245	GO:0034641	0.0392923	1.18295	170.856	190	4195	cellular nitrogen compound metabolic process
									246	GO:0010466	0.0393844	7.87689	0.325828	2	8	negative regulation of peptidase activity
									247	GO:0005992	0.0393844	7.87689	0.325828	2	8	trehalose biosynthetic process
									248	GO:0052547	0.0393844	7.87689	0.325828	2	8	regulation of peptidase activity
									249	GO:0052548	0.0393844	7.87689	0.325828	2	8	regulation of endopeptidase activity
									250	GO:0009073	0.0393844	7.87689	0.325828	2	8	aromatic amino acid family biosynthetic process
									251	GO:0046351	0.0393844	7.87689	0.325828	2	8	disaccharide biosynthetic process
									252	GO:0045861	0.0393844	7.87689	0.325828	2	8	negative regulation of proteolysis
									253	GO:0010951	0.0393844	7.87689	0.325828	2	8	negative regulation of endopeptidase activity
									254	GO:0065009	0.0396663	2.18364	3.86921	8	95	regulation of molecular function
									255	GO:0007015	0.0396856	3.38267	1.30331	4	32	actin filament organization
									256	GO:0071973	0.0400592	4.4356	0.773842	3	19	bacterial-type flagellum-dependent cell motility
									257	GO:0030521	0.0400592	4.4356	0.773842	3	19	androgen receptor signaling pathway
									258	GO:0030522	0.0400592	4.4356	0.773842	3	19	intracellular receptor signaling pathway
									259	GO:0030518	0.0400592	4.4356	0.773842	3	19	intracellular steroid hormone receptor signaling pathway
									260	GO:1901575	0.0404475	1.51478	16.4136	24	403	organic substance catabolic process
									261	GO:0033043	0.0416461	2.30712	3.21755	7	79	regulation of organelle organization
									262	GO:0043207	0.0429574	2.03641	4.64305	9	114	response to external biotic stimulus
									263	GO:0051707	0.0429574	2.03641	4.64305	9	114	response to other organism
									264	GO:0009056	0.043223	1.40424	25.048	34	615	catabolic process
									265	GO:0032940	0.0440115	2.13423	3.95066	8	97	secretion by cell
									266	GO:0007165	0.0443125	1.2924	47.3265	59	1162	signal transduction
									267	GO:0050790	0.045436	2.45295	2.60662	6	64	regulation of catalytic activity
									268	GO:0043401	0.0457458	4.17435	0.81457	3	20	steroid hormone mediated signaling pathway
									269	GO:0048545	0.0457458	4.17435	0.81457	3	20	response to steroid hormone
									270	GO:0071396	0.0457458	4.17435	0.81457	3	20	cellular response to lipid
									271	GO:0071383	0.0457458	4.17435	0.81457	3	20	cellular response to steroid hormone stimulus
									272	GO:0071407	0.0457458	4.17435	0.81457	3	20	cellular response to organic cyclic compound
									273	GO:0001539	0.0457458	4.17435	0.81457	3	20	cilium or flagellum-dependent cell motility
									274	GO:0033993	0.0457458	4.17435	0.81457	3	20	response to lipid
									275	GO:0097588	0.0457458	4.17435	0.81457	3	20	archaeal or bacterial-type flagellum-dependent cell motility
									276	GO:0014070	0.0457458	4.17435	0.81457	3	20	response to organic cyclic compound
									277	GO:0015074	0.046337	1.8552	6.19073	11	152	DNA integration
									278	GO:0051493	0.048058	3.15665	1.38477	4	34	regulation of cytoskeleton organization
									279	GO:0006563	0.0492957	6.75108	0.366557	2	9	L-serine metabolic process
									280	GO:0009070	0.0492957	6.75108	0.366557	2	9	serine family amino acid biosynthetic process
									281	GO:0006534	0.0492957	6.75108	0.366557	2	9	cysteine metabolic process
									282	GO:0006535	0.0492957	6.75108	0.366557	2	9	cysteine biosynthetic process from serine
									283	GO:0019344	0.0492957	6.75108	0.366557	2	9	cysteine biosynthetic process
									284	GO:0043085	0.0492957	6.75108	0.366557	2	9	positive regulation of catalytic activity
									285	GO:0009404	0.0492957	6.75108	0.366557	2	9	toxin metabolic process
									286	GO:0000097	0.0492957	6.75108	0.366557	2	9	sulfur amino acid biosynthetic process
									287	GO:0042546	0.0492957	6.75108	0.366557	2	9	cell wall biogenesis
Cluster 5 Molecular function (MF)									Cluster 5 Biological process (BP)									Cluster 5 Cellular component (CC)
	GOMFID	Pvalue	OddsRatio	ExpCount	Count	Size	Term			GOBPID	Pvalue	OddsRatio	ExpCount	Count	Size	Term			GOCCID	Pvalue	OddsRatio	ExpCount	Count	Size	Term
1	GO:0005509	6.41e-11	3.30769	16.3723	47	327	calcium ion binding		1	GO:1903506	8.95e-13	2.20348	67.0716	126	1349	regulation of nucleic acid-templated transcription		1	GO:0005856	5.42e-05	2.2891	15.9768	33	311	cytoskeleton
2	GO:0003993	5.28e-10	7.49675	3.40463	19	68	acid phosphatase activity		2	GO:0006355	8.95e-13	2.20348	67.0716	126	1349	regulation of transcription, DNA-templated		2	GO:0016020	5.81e-05	1.46937	212.27	252	4132	membrane
3	GO:0005515	6.76e-08	1.49821	214.191	282	4278	protein binding		3	GO:2001141	1.11e-12	2.19551	67.2705	126	1353	regulation of RNA biosynthetic process		3	GO:0016021	0.00010627	1.48147	120.982	156	2355	integral component of membrane
4	GO:0046983	2.27e-06	2.64366	14.2193	34	284	protein dimerization activity		4	GO:0051252	1.11e-12	2.19551	67.2705	126	1353	regulation of RNA metabolic process		4	GO:0031224	0.00012184	1.47593	121.29	156	2361	intrinsic component of membrane
5	GO:0043565	1.46e-05	2.43428	14.8202	33	296	sequence-specific DNA binding		5	GO:2000112	2.52e-12	2.15844	68.8118	127	1384	regulation of cellular macromolecule biosynthetic process		5	GO:0016459	0.00013221	4.11421	3.44194	12	67	myosin complex
6	GO:0003700	1.87e-05	2.0509	24.7337	47	494	transcription factor activity, sequence-specific DNA binding		6	GO:0019219	2.97e-12	2.15834	68.2152	126	1372	regulation of nucleobase-containing compound metabolic process		6	GO:0044430	0.00017575	2.22263	14.8466	30	289	cytoskeletal part
7	GO:0001071	1.87e-05	2.0509	24.7337	47	494	nucleic acid binding transcription factor activity		7	GO:0010556	3.08e-12	2.15082	69.0107	127	1388	regulation of macromolecule biosynthetic process		7	GO:0071944	0.00055653	2.05803	15.874	30	309	cell periphery
8	GO:0003779	0.00012197	3.83636	3.90531	13	78	actin binding		8	GO:0031326	3.08e-12	2.15082	69.0107	127	1388	regulation of cellular biosynthetic process		8	GO:0015629	0.00061223	3.0366	5.1886	14	101	actin cytoskeleton
9	GO:0003677	0.00019958	1.4072	114.806	151	2293	DNA binding		9	GO:0080090	3.25e-12	2.13126	71.3475	130	1435	regulation of primary metabolic process		9	GO:0005886	0.00143682	2.17488	10.9937	22	214	plasma membrane
10	GO:0004363	0.00048169	57.1092	0.200272	3	4	glutathione synthase activity		10	GO:0009889	3.78e-12	2.14325	69.2096	127	1392	regulation of biosynthetic process		10	GO:0044425	0.00159384	1.35555	144.87	174	2820	membrane part
11	GO:0003774	0.00049536	2.72098	6.85933	17	137	motor activity		11	GO:0031323	3.97e-12	2.12398	71.5464	130	1439	regulation of cellular metabolic process		11	GO:0030694	0.00263339	Inf	0.102745	2	2	bacterial-type flagellum basal body, rod
12	GO:0015144	0.00057875	7.15668	1.1015	6	22	carbohydrate transmembrane transporter activity		12	GO:0051171	4.86e-12	2.13385	69.4582	127	1397	regulation of nitrogen compound metabolic process		12	GO:0009425	0.00263339	Inf	0.102745	2	2	bacterial-type flagellum basal body
13	GO:1901476	0.00057875	7.15668	1.1015	6	22	carbohydrate transporter activity		13	GO:0019222	4.97e-12	2.08883	75.6234	135	1521	regulation of metabolic process		13	GO:0009426	0.00263339	Inf	0.102745	2	2	bacterial-type flagellum basal body, distal rod
14	GO:0005488	0.00059523	1.28497	600.317	644	11990	binding		14	GO:0010468	5.08e-12	2.11494	71.795	130	1444	regulation of gene expression		14	GO:0009428	0.00263339	Inf	0.102745	2	2	bacterial-type flagellum basal body, distal rod, P ring
15	GO:0008982	0.0006423	15.2428	0.450613	4	9	protein-N(PI)-phosphohistidine-sugar phosphotransferase activity		15	GO:0065007	2.01e-11	1.79159	152.987	226	3077	biological regulation		15	GO:0009523	0.0059625	6.76749	0.770584	4	15	photosystem II
16	GO:0004861	0.0006423	15.2428	0.450613	4	9	cyclin-dependent protein serine/threonine kinase inhibitor activity		16	GO:0060255	2.1e-11	2.05793	74.0324	131	1489	regulation of macromolecule metabolic process		16	GO:0030288	0.00763079	37.0963	0.154117	2	3	outer membrane-bounded periplasmic space
17	GO:0008083	0.00070451	4.77746	2.00272	8	40	growth factor activity		17	GO:0098609	2.55e-11	11.4794	2.2871	17	46	cell-cell adhesion		17	GO:0030479	0.00763079	37.0963	0.154117	2	3	actin cortical patch
18	GO:0004832	0.00102817	12.7016	0.500681	4	10	valine-tRNA ligase activity		18	GO:0050794	9.3e-11	1.78624	136.928	205	2754	regulation of cellular process		18	GO:0009277	0.00763079	37.0963	0.154117	2	3	fungal-type cell wall
19	GO:0000030	0.00102817	12.7016	0.500681	4	10	mannosyltransferase activity		19	GO:0007156	4.54e-10	11.2646	2.0385	15	41	homophilic cell adhesion via plasma membrane adhesion molecules		19	GO:0061645	0.00763079	37.0963	0.154117	2	3	endocytic patch
20	GO:0004867	0.00120797	6.02559	1.2517	6	25	serine-type endopeptidase inhibitor activity		20	GO:0050789	4.75e-10	1.73883	141.999	208	2856	regulation of biological process		20	GO:0030863	0.00763079	37.0963	0.154117	2	3	cortical cytoskeleton
21	GO:0016791	0.00134423	2.12735	11.5657	23	231	phosphatase activity		21	GO:0098742	6.74e-10	10.8465	2.08822	15	42	cell-cell adhesion via plasma-membrane adhesion molecules		21	GO:0030864	0.00763079	37.0963	0.154117	2	3	cortical actin cytoskeleton
22	GO:0004860	0.00155192	10.8864	0.550749	4	11	protein kinase inhibitor activity		22	GO:0051181	1.47e-09	77.3959	0.497195	8	10	cofactor transport		22	GO:0090665	0.00958277	5.72492	0.873329	4	17	glycoprotein complex
23	GO:0019210	0.00155192	10.8864	0.550749	4	11	kinase inhibitor activity		23	GO:0015886	1.47e-09	77.3959	0.497195	8	10	heme transport		23	GO:0016010	0.00958277	5.72492	0.873329	4	17	dystrophin-associated glycoprotein complex
24	GO:0016843	0.00155192	10.8864	0.550749	4	11	amine-lyase activity		24	GO:1901678	5.17e-09	51.5931	0.546915	8	11	iron coordination entity transport		24	GO:0000777	0.0132852	2.31532	5.13723	11	100	condensed chromosome kinetochore
25	GO:0016844	0.00155192	10.8864	0.550749	4	11	strictosidine synthase activity		25	GO:0022610	9.95e-08	3.23079	11.336	32	228	biological adhesion		25	GO:0000779	0.0132852	2.31532	5.13723	11	100	condensed chromosome, centromeric region
26	GO:0030291	0.00155192	10.8864	0.550749	4	11	protein serine/threonine kinase inhibitor activity		26	GO:0006351	1.38e-07	1.71323	91.5833	139	1842	transcription, DNA-templated		26	GO:0016592	0.0138426	2.20547	5.85644	12	114	mediator complex
27	GO:0004857	0.00171771	2.56766	6.35865	15	127	enzyme inhibitor activity		27	GO:0097659	1.38e-07	1.71323	91.5833	139	1842	nucleic acid-templated transcription		27	GO:0000780	0.0147285	2.71729	3.23645	8	63	condensed nuclear chromosome, centromeric region
28	GO:0042578	0.00226331	1.93969	14.2193	26	284	phosphoric ester hydrolase activity		28	GO:0032774	2.18e-07	1.69703	92.2794	139	1856	RNA biosynthetic process		28	GO:0000778	0.0147285	2.71729	3.23645	8	63	condensed nuclear chromosome kinetochore
29	GO:0047961	0.00250412	Inf	0.100136	2	2	glycine N-acyltransferase activity		29	GO:0007155	2.85e-07	3.20145	10.6897	30	215	cell adhesion		29	GO:0034464	0.0147434	18.5459	0.205489	2	4	BBSome
30	GO:0033897	0.00250412	Inf	0.100136	2	2	ribonuclease T2 activity		30	GO:0034654	3.13e-06	1.59153	100.135	143	2014	nucleobase-containing compound biosynthetic process		30	GO:0005929	0.0155105	2.36869	4.57213	10	89	cilium
31	GO:0003785	0.00250412	Inf	0.100136	2	2	actin monomer binding		31	GO:1901362	3.94e-06	1.56187	110.129	154	2215	organic cyclic compound biosynthetic process		31	GO:0000940	0.0166791	2.33879	4.6235	10	90	condensed chromosome outer kinetochore
32	GO:0004352	0.00250412	Inf	0.100136	2	2	glutamate dehydrogenase (NAD+) activity		32	GO:0019438	1.4e-05	1.53479	103.814	144	2088	aromatic compound biosynthetic process		32	GO:0120025	0.0179118	2.30962	4.67488	10	91	plasma membrane bounded cell projection
33	GO:0050839	0.00250412	Inf	0.100136	2	2	cell adhesion molecule binding		33	GO:0018130	2.85e-05	1.51004	104.361	143	2099	heterocycle biosynthetic process		33	GO:0000794	0.0209571	2.36886	4.10978	9	80	condensed nuclear chromosome
34	GO:0004421	0.00250412	Inf	0.100136	2	2	hydroxymethylglutaryl-CoA synthase activity		34	GO:0000747	2.91e-05	76.9207	0.248598	4	5	conjugation with cellular fusion		34	GO:0000793	0.0238938	2.02436	6.31879	12	123	condensed chromosome
35	GO:0070336	0.00250412	Inf	0.100136	2	2	flap-structured DNA binding		35	GO:0006493	2.91e-05	76.9207	0.248598	4	5	protein O-linked glycosylation		35	GO:0009521	0.0240595	4.1321	1.13019	4	22	photosystem
36	GO:0016639	0.00250412	Inf	0.100136	2	2	oxidoreductase activity, acting on the CH-NH2 group of donors, NAD or NADP as acceptor		36	GO:0017004	0.00012992	6.43818	1.59102	8	32	cytochrome complex assembly		36	GO:0034357	0.0240595	4.1321	1.13019	4	22	photosynthetic membrane
37	GO:0070001	0.00296163	2.26421	8.06097	17	161	aspartic-type peptidase activity		37	GO:0016070	0.00015057	1.41534	129.619	167	2607	RNA metabolic process		37	GO:0099513	0.025854	2.61095	2.92822	7	57	polymeric cytoskeletal fiber
38	GO:0004190	0.00296163	2.26421	8.06097	17	161	aspartic-type endopeptidase activity		38	GO:0007050	0.00018787	25.6361	0.348037	4	7	cell cycle arrest		38	GO:0000775	0.0271137	1.78741	9.4525	16	184	chromosome, centromeric region
39	GO:0098772	0.00393562	1.7026	20.9785	34	419	molecular function regulator		39	GO:0040011	0.00020516	2.60871	8.85007	21	178	locomotion		39	GO:0098687	0.0271137	1.78741	9.4525	16	184	chromosomal region
40	GO:0004866	0.00407077	2.9409	3.75511	10	75	endopeptidase inhibitor activity		40	GO:1902582	0.00045645	3.12153	5.02167	14	101	single-organism intracellular transport		40	GO:0015630	0.0271137	1.78741	9.4525	16	184	microtubule cytoskeleton
41	GO:0061135	0.00407077	2.9409	3.75511	10	75	endopeptidase regulator activity		41	GO:0034645	0.00046683	1.36999	136.231	171	2740	cellular macromolecule biosynthetic process		41	GO:0019012	0.0272531	1.52209	19.9838	29	389	virion
42	GO:0008199	0.00546834	6.92607	0.751022	4	15	ferric iron binding		42	GO:0071702	0.00050929	1.59721	45.4934	68	915	organic substance transport		42	GO:0098797	0.0279769	3.91414	1.18156	4	23	plasma membrane protein complex
43	GO:0016760	0.00579513	11.4191	0.400545	3	8	cellulose synthase (UDP-forming) activity		43	GO:0009059	0.0006556	1.3573	137.176	171	2759	macromolecule biosynthetic process		43	GO:0005876	0.0320249	2.72595	2.4145	6	47	spindle microtubule
44	GO:0016759	0.00579513	11.4191	0.400545	3	8	cellulose synthase activity		44	GO:1902580	0.00068013	2.98335	5.22055	14	105	single-organism cellular localization		44	GO:0042995	0.0330703	1.9191	6.62702	12	129	cell projection
45	GO:0030234	0.00609317	1.7849	15.3208	26	306	enzyme regulator activity		45	GO:1902578	0.00073561	1.6254	38.6818	59	778	single-organism localization		45	GO:0000942	0.0331593	2.46224	3.08234	7	60	condensed nuclear chromosome outer kinetochore
46	GO:0016538	0.00700598	6.34852	0.80109	4	16	cyclin-dependent protein serine/threonine kinase regulator activity		46	GO:0010467	0.0008123	1.33554	154.528	189	3108	gene expression		46	GO:0042729	0.0331593	2.46224	3.08234	7	60	DASH complex
47	GO:0045145	0.00726214	38.0295	0.150204	2	3	single-stranded DNA 5'-3' exodeoxyribonuclease activity		47	GO:0048870	0.00099036	2.85681	5.41943	14	109	cell motility		47	GO:0005618	0.0344141	9.27064	0.308234	2	6	cell wall
48	GO:0008409	0.00726214	38.0295	0.150204	2	3	5'-3' exonuclease activity		48	GO:0051674	0.00099036	2.85681	5.41943	14	109	localization of cell		48	GO:0044463	0.0368885	3.54049	1.28431	4	25	cell projection part
49	GO:0008297	0.00726214	38.0295	0.150204	2	3	single-stranded DNA exodeoxyribonuclease activity		49	GO:0006879	0.00099957	12.8149	0.497195	4	10	cellular iron ion homeostasis		49	GO:0044436	0.0368885	3.54049	1.28431	4	25	thylakoid part
50	GO:0035312	0.00726214	38.0295	0.150204	2	3	5'-3' exodeoxyribonuclease activity		50	GO:0055072	0.00099957	12.8149	0.497195	4	10	iron ion homeostasis		50	GO:0009579	0.0368885	3.54049	1.28431	4	25	thylakoid
51	GO:0005102	0.00962591	1.77991	13.5685	23	271	receptor binding		51	GO:0006438	0.00099957	12.8149	0.497195	4	10	valyl-tRNA aminoacylation		51	GO:0005819	0.0405794	1.98698	5.34272	10	104	spindle
52	GO:0008238	0.0105027	2.2004	6.30858	13	126	exopeptidase activity		52	GO:0009101	0.00113255	3.32454	3.72896	11	75	glycoprotein biosynthetic process		52	GO:0000776	0.0406988	1.80199	7.6031	13	148	kinetochore
53	GO:0016840	0.0108785	5.44094	0.901226	4	18	carbon-nitrogen lyase activity		53	GO:0006486	0.00113255	3.32454	3.72896	11	75	protein glycosylation		53	GO:0044423	0.0442726	1.46994	19.1619	27	373	virion part
54	GO:0030414	0.011509	2.48079	4.35593	10	87	peptidase inhibitor activity		54	GO:0043413	0.00113255	3.32454	3.72896	11	75	macromolecule glycosylation		54	GO:0044279	0.0472514	3.23182	1.38705	4	27	other organism membrane
55	GO:0061134	0.011509	2.48079	4.35593	10	87	peptidase regulator activity		55	GO:0006955	0.00114559	3.57928	3.18205	10	64	immune response		55	GO:0044218	0.0472514	3.23182	1.38705	4	27	other organism cell membrane
56	GO:0008092	0.0122968	1.73723	13.8689	23	277	cytoskeletal protein binding		56	GO:0016055	0.00116035	6.08277	1.24299	6	25	Wnt signaling pathway		56	GO:0033644	0.0472514	3.23182	1.38705	4	27	host cell membrane
57	GO:0015109	0.0140426	19.0136	0.200272	2	4	chromate transmembrane transporter activity		57	GO:0198738	0.00116035	6.08277	1.24299	6	25	cell-cell signaling by wnt		57	GO:0099512	0.0481678	2.24858	3.3392	7	65	supramolecular fiber
58	GO:0004180	0.0154549	2.67807	3.25443	8	65	carboxypeptidase activity		58	GO:1905114	0.00116035	6.08277	1.24299	6	25	cell surface receptor signaling pathway involved in cell-cell signaling		58	GO:0099080	0.0481678	2.24858	3.3392	7	65	supramolecular complex
59	GO:0000155	0.0156302	3.81049	1.50204	5	30	phosphorelay sensor kinase activity		59	GO:0006928	0.00132617	2.27483	9.49643	20	191	movement of cell or subcellular component		59	GO:0099081	0.0481678	2.24858	3.3392	7	65	supramolecular polymer
60	GO:0090482	0.0195963	6.34243	0.600817	3	12	vitamin transmembrane transporter activity		60	GO:0070085	0.00141235	3.22327	3.8284	11	77	glycosylation
61	GO:0005044	0.0195963	6.34243	0.600817	3	12	scavenger receptor activity		61	GO:0009100	0.00141235	3.22327	3.8284	11	77	glycoprotein metabolic process
62	GO:0038024	0.0195963	6.34243	0.600817	3	12	cargo receptor activity		62	GO:0051180	0.00149193	7.40055	0.894951	5	18	vitamin transport
63	GO:0003911	0.0226315	12.675	0.250341	2	5	DNA ligase (NAD+) activity		63	GO:0008643	0.00150514	4.17172	2.23738	8	45	carbohydrate transport
64	GO:0008191	0.0226315	12.675	0.250341	2	5	metalloendopeptidase inhibitor activity		64	GO:0007016	0.00150927	10.9833	0.546915	4	11	cytoskeletal anchoring at plasma membrane
65	GO:0016775	0.0230264	3.40161	1.65225	5	33	phosphotransferase activity, nitrogenous group as acceptor		65	GO:1902593	0.00157215	3.1749	3.87812	11	78	single-organism nuclear import
66	GO:0004673	0.0230264	3.40161	1.65225	5	33	protein histidine kinase activity		66	GO:0006606	0.00157215	3.1749	3.87812	11	78	protein import into nucleus
67	GO:0004629	0.0245443	5.70785	0.650886	3	13	phospholipase C activity		67	GO:0051170	0.00157215	3.1749	3.87812	11	78	nuclear import
68	GO:0019887	0.0298122	3.80729	1.20163	4	24	protein kinase regulator activity		68	GO:0044744	0.00157215	3.1749	3.87812	11	78	protein targeting to nucleus
69	GO:0051183	0.0300999	5.18864	0.700954	3	14	vitamin transporter activity		69	GO:0034504	0.00157215	3.1749	3.87812	11	78	protein localization to nucleus
70	GO:0000989	0.0312267	1.71127	10.3641	17	207	transcription factor activity, transcription factor binding		70	GO:1901576	0.00165654	1.30293	167.107	200	3361	organic substance biosynthetic process
71	GO:0003712	0.0312267	1.71127	10.3641	17	207	transcription cofactor activity		71	GO:0044765	0.00204375	1.56493	37.8863	56	762	single-organism transport
72	GO:0032266	0.0328311	9.50568	0.300409	2	6	phosphatidylinositol-3-phosphate binding		72	GO:0046916	0.00217545	9.60964	0.596634	4	12	cellular transition metal ion homeostasis
73	GO:0016892	0.0328311	9.50568	0.300409	2	6	endoribonuclease activity, producing 3'-phosphomonoesters		73	GO:0071705	0.00222877	1.55791	38.0354	56	765	nitrogen compound transport
74	GO:0016757	0.0353688	1.60814	12.9176	20	258	transferase activity, transferring glycosyl groups		74	GO:0045002	0.0024684	Inf	0.099439	2	2	double-strand break repair via single-strand annealing
75	GO:0033764	0.0354534	2.03006	5.20708	10	104	steroid dehydrogenase activity, acting on the CH-OH group of donors, NAD or NADP as acceptor		75	GO:0006103	0.0024684	Inf	0.099439	2	2	2-oxoglutarate metabolic process
76	GO:0016229	0.0354534	2.03006	5.20708	10	104	steroid dehydrogenase activity		76	GO:0098740	0.0024684	Inf	0.099439	2	2	multi organism cell adhesion
77	GO:0003854	0.0354534	2.03006	5.20708	10	104	3-beta-hydroxy-delta5-steroid dehydrogenase activity		77	GO:0019042	0.0024684	Inf	0.099439	2	2	viral latency
78	GO:0035251	0.0362578	4.75597	0.751022	3	15	UDP-glucosyltransferase activity		78	GO:0098610	0.0024684	Inf	0.099439	2	2	adhesion between unicellular organisms
79	GO:0004181	0.0410584	2.54018	2.55347	6	51	metallocarboxypeptidase activity		79	GO:0006538	0.0024684	Inf	0.099439	2	2	glutamate catabolic process
80	GO:0008235	0.0410584	2.54018	2.55347	6	51	metalloexopeptidase activity		80	GO:0022413	0.0024684	Inf	0.099439	2	2	reproductive process in single-celled organism
81	GO:0001871	0.0430082	4.38987	0.80109	3	16	pattern binding		81	GO:0043649	0.0024684	Inf	0.099439	2	2	dicarboxylic acid catabolic process
82	GO:0030247	0.0430082	4.38987	0.80109	3	16	polysaccharide binding		82	GO:0000752	0.0024684	Inf	0.099439	2	2	agglutination involved in conjugation with cellular fusion
83	GO:0016298	0.048062	2.72015	2.00272	5	40	lipase activity		83	GO:0000755	0.0024684	Inf	0.099439	2	2	cytogamy
84	GO:0016151	0.0489881	1.90757	5.50749	10	110	nickel cation binding		84	GO:0000771	0.0024684	Inf	0.099439	2	2	agglutination involved in conjugation
									85	GO:0000735	0.0024684	Inf	0.099439	2	2	removal of nonhomologous ends
									86	GO:0000736	0.0024684	Inf	0.099439	2	2	double-strand break repair via single-strand annealing, removal of nonhomologous ends
									87	GO:0032220	0.0024684	Inf	0.099439	2	2	plasma membrane fusion involved in cytogamy
									88	GO:0019551	0.0024684	Inf	0.099439	2	2	glutamate catabolic process to 2-oxoglutarate
									89	GO:0045026	0.0024684	Inf	0.099439	2	2	plasma membrane fusion
									90	GO:0048523	0.00292885	2.2111	8.75063	18	176	negative regulation of cellular process
									91	GO:0009058	0.00359375	1.27156	174.515	205	3510	biosynthetic process
									92	GO:0044249	0.00365912	1.27875	159.401	189	3206	cellular biosynthetic process
									93	GO:0055076	0.00406307	7.68647	0.696073	4	14	transition metal ion homeostasis
									94	GO:0045087	0.00406307	7.68647	0.696073	4	14	innate immune response
									95	GO:0051169	0.00427253	2.60681	5.02167	12	101	nuclear transport
									96	GO:0006913	0.00427253	2.60681	5.02167	12	101	nucleocytoplasmic transport
									97	GO:0008608	0.00429107	3.85344	2.08822	7	42	attachment of spindle microtubules to kinetochore
									98	GO:0009401	0.00441727	4.44258	1.59102	6	32	phosphoenolpyruvate-dependent sugar phosphotransferase system
									99	GO:0008299	0.00441727	4.44258	1.59102	6	32	isoprenoid biosynthetic process
									100	GO:0044764	0.00465227	1.73281	18.8934	31	380	multi-organism cellular process
									101	GO:0007267	0.005595	3.64455	2.18766	7	44	cell-cell signaling
									102	GO:0044271	0.00559656	1.28383	127.978	154	2574	cellular nitrogen compound biosynthetic process
									103	GO:0030244	0.00567708	11.5165	0.397756	3	8	cellulose biosynthetic process
									104	GO:0098813	0.00584691	2.49388	5.22055	12	105	nuclear chromosome segregation
									105	GO:0006720	0.0060271	4.12458	1.69046	6	34	isoprenoid metabolic process
									106	GO:0044699	0.0067825	1.22824	246.609	277	4960	single-organism process
									107	GO:0030334	0.0068249	6.40435	0.795512	4	16	regulation of cell migration
									108	GO:0051270	0.0068249	6.40435	0.795512	4	16	regulation of cellular component movement
									109	GO:2000145	0.0068249	6.40435	0.795512	4	16	regulation of cell motility
									110	GO:0016477	0.0068249	6.40435	0.795512	4	16	cell migration
									111	GO:0040012	0.0068249	6.40435	0.795512	4	16	regulation of locomotion
									112	GO:0006357	0.00684227	2.18301	7.35849	15	148	regulation of transcription from RNA polymerase II promoter
									113	GO:0098743	0.00716046	38.3411	0.149159	2	3	cell aggregation
									114	GO:0098630	0.00716046	38.3411	0.149159	2	3	aggregation of unicellular organisms
									115	GO:0071444	0.00716046	38.3411	0.149159	2	3	cellular response to pheromone
									116	GO:0000749	0.00716046	38.3411	0.149159	2	3	response to pheromone involved in conjugation with cellular fusion
									117	GO:0017038	0.00758594	2.30575	6.06578	13	122	protein import
									118	GO:0044767	0.00811225	1.84102	12.6288	22	254	single-organism developmental process
									119	GO:0006750	0.00820352	9.59627	0.447476	3	9	glutathione biosynthetic process
									120	GO:0019184	0.00820352	9.59627	0.447476	3	9	nonribosomal peptide biosynthetic process
									121	GO:0019236	0.00820352	9.59627	0.447476	3	9	response to pheromone
									122	GO:0048519	0.00855866	1.86067	11.9327	21	240	negative regulation of biological process
									123	GO:0045185	0.00857932	5.91123	0.845232	4	17	maintenance of protein location
									124	GO:0051651	0.00857932	5.91123	0.845232	4	17	maintenance of location in cell
									125	GO:0032507	0.00857932	5.91123	0.845232	4	17	maintenance of protein location in cell
									126	GO:0032502	0.00909832	1.79366	13.5237	23	272	developmental process
									127	GO:0007275	0.0111012	2.11458	7.06017	14	142	multicellular organism development
									128	GO:0009987	0.0111805	1.21381	384.829	413	7740	cellular process
									129	GO:0030243	0.0112909	8.22471	0.497195	3	10	cellulose metabolic process
									130	GO:0051726	0.0132384	2.30746	5.12111	11	103	regulation of cell cycle
									131	GO:0044097	0.0138496	19.169	0.198878	2	4	secretion by the type IV secretion system
									132	GO:0006106	0.0138496	19.169	0.198878	2	4	fumarate metabolic process
									133	GO:0030255	0.0138496	19.169	0.198878	2	4	protein secretion by the type IV secretion system
									134	GO:0009065	0.0138496	19.169	0.198878	2	4	glutamine family amino acid catabolic process
									135	GO:0045444	0.0138496	19.169	0.198878	2	4	fat cell differentiation
									136	GO:0007160	0.0138496	19.169	0.198878	2	4	cell-matrix adhesion
									137	GO:0031589	0.0138496	19.169	0.198878	2	4	cell-substrate adhesion
									138	GO:0015703	0.0138496	19.169	0.198878	2	4	chromate transport
									139	GO:0015889	0.0138496	19.169	0.198878	2	4	cobalamin transport
									140	GO:0007010	0.0144551	1.93439	8.75063	16	176	cytoskeleton organization
									141	GO:0051604	0.0149475	1.75453	12.579	21	253	protein maturation
									142	GO:0051274	0.014959	7.19604	0.546915	3	11	beta-glucan biosynthetic process
									143	GO:0051235	0.0155211	4.80171	0.99439	4	20	maintenance of location
									144	GO:0007059	0.0184104	1.875	8.99923	16	181	chromosome segregation
									145	GO:0051346	0.0184365	4.51889	1.04411	4	21	negative regulation of hydrolase activity
									146	GO:0000746	0.0184365	4.51889	1.04411	4	21	conjugation
									147	GO:0022402	0.0190577	1.68529	13.6729	22	275	cell cycle process
									148	GO:0000003	0.01911	1.82683	9.79474	17	197	reproduction
									149	GO:0008104	0.0216159	1.40508	34.8037	47	700	protein localization
									150	GO:0033692	0.0223742	3.4318	1.64074	5	33	cellular polysaccharide biosynthetic process
									151	GO:0051273	0.0240804	5.7559	0.646354	3	13	beta-glucan metabolic process
									152	GO:0009250	0.0240804	5.7559	0.646354	3	13	glucan biosynthetic process
									153	GO:0045786	0.0242209	2.64108	2.88373	7	58	negative regulation of cell cycle
									154	GO:0044092	0.0252275	4.04256	1.14355	4	23	negative regulation of molecular function
									155	GO:0043086	0.0252275	4.04256	1.14355	4	23	negative regulation of catalytic activity
									156	GO:0072594	0.0258336	1.75743	10.1428	17	204	establishment of protein localization to organelle
									157	GO:0000271	0.028229	3.20249	1.74018	5	35	polysaccharide biosynthetic process
									158	GO:0045995	0.0295397	5.23221	0.696073	3	14	regulation of embryonic development
									159	GO:0006749	0.0295397	5.23221	0.696073	3	14	glutathione metabolic process
									160	GO:0009968	0.0295397	5.23221	0.696073	3	14	negative regulation of signal transduction
									161	GO:0023057	0.0295397	5.23221	0.696073	3	14	negative regulation of signaling
									162	GO:0010648	0.0295397	5.23221	0.696073	3	14	negative regulation of cell communication
									163	GO:0007166	0.0304724	2.19402	4.37532	9	88	cell surface receptor signaling pathway
									164	GO:0043154	0.0323968	9.58295	0.298317	2	6	negative regulation of cysteine-type endopeptidase activity involved in apoptotic process
									165	GO:0043281	0.0323968	9.58295	0.298317	2	6	regulation of cysteine-type endopeptidase activity involved in apoptotic process
									166	GO:0000469	0.0323968	9.58295	0.298317	2	6	cleavage involved in rRNA processing
									167	GO:2000116	0.0323968	9.58295	0.298317	2	6	regulation of cysteine-type endopeptidase activity
									168	GO:2000117	0.0323968	9.58295	0.298317	2	6	negative regulation of cysteine-type endopeptidase activity
									169	GO:0015979	0.0335674	2.68251	2.43626	6	49	photosynthesis
									170	GO:0033365	0.0342916	1.66457	11.2863	18	227	protein localization to organelle
									171	GO:0044264	0.0349718	3.00185	1.83962	5	37	cellular polysaccharide metabolic process
									172	GO:0016032	0.0358472	1.52278	17.0538	25	343	viral process
									173	GO:0032505	0.0369521	2.2312	3.8284	8	77	reproduction of a single-celled organism
									174	GO:0009233	0.0379048	3.49046	1.29271	4	26	menaquinone metabolic process
									175	GO:0009234	0.0379048	3.49046	1.29271	4	26	menaquinone biosynthetic process
									176	GO:0050790	0.0388855	2.36192	3.18205	7	64	regulation of catalytic activity
									177	GO:0006605	0.039792	1.6583	10.6897	17	215	protein targeting
									178	GO:0044707	0.0403179	1.5847	13.126	20	264	single-multicellular organism process
									179	GO:0033036	0.0409926	1.31633	41.665	53	838	macromolecule localization
									180	GO:0030155	0.0422321	4.42654	0.795512	3	16	regulation of cell adhesion
									181	GO:0022414	0.0427151	1.70272	9.19811	15	185	reproductive process
									182	GO:0006302	0.0428079	3.33843	1.34243	4	27	double-strand break repair
									183	GO:0019058	0.0428244	1.64144	10.7891	17	217	viral life cycle
									184	GO:0015031	0.0432215	1.35104	32.9143	43	662	protein transport
									185	GO:0051016	0.043882	7.66574	0.348037	2	7	barbed-end actin filament capping
									186	GO:0070727	0.0444304	1.37449	28.5887	38	575	cellular macromolecule localization
									187	GO:0034613	0.0444304	1.37449	28.5887	38	575	cellular protein localization
									188	GO:0006873	0.0467503	2.45341	2.63513	6	53	cellular ion homeostasis
									189	GO:0006875	0.0467503	2.45341	2.63513	6	53	cellular metal ion homeostasis
									190	GO:0055082	0.0467503	2.45341	2.63513	6	53	cellular chemical homeostasis
									191	GO:0030003	0.0467503	2.45341	2.63513	6	53	cellular cation homeostasis
									192	GO:0016042	0.0468087	2.74388	1.98878	5	40	lipid catabolic process
									193	GO:0015833	0.0468457	1.34191	33.1132	43	666	peptide transport
									194	GO:0042886	0.0468457	1.34191	33.1132	43	666	amide transport
									195	GO:0006694	0.0469295	1.92559	5.46915	10	110	steroid biosynthetic process
									196	GO:0045184	0.0477864	1.33964	33.1629	43	667	establishment of protein localization
									197	GO:0000398	0.0480159	2.24328	3.33121	7	67	mRNA splicing, via spliceosome
									198	GO:0000377	0.0480159	2.24328	3.33121	7	67	RNA splicing, via transesterification reactions with bulged adenosine as nucleophile
									199	GO:0044042	0.0494434	4.11003	0.845232	3	17	glucan metabolic process
									200	GO:0006073	0.0494434	4.11003	0.845232	3	17	cellular glucan metabolic process
									201	GO:0030336	0.0497195	Inf	0.0497195	1	1	negative regulation of cell migration
									202	GO:1902750	0.0497195	Inf	0.0497195	1	1	negative regulation of cell cycle G2/M phase transition
									203	GO:1902749	0.0497195	Inf	0.0497195	1	1	regulation of cell cycle G2/M phase transition
									204	GO:0042073	0.0497195	Inf	0.0497195	1	1	intraciliary transport
									205	GO:0000390	0.0497195	Inf	0.0497195	1	1	spliceosomal complex disassembly
									206	GO:0098840	0.0497195	Inf	0.0497195	1	1	protein transport along microtubule
									207	GO:0032988	0.0497195	Inf	0.0497195	1	1	ribonucleoprotein complex disassembly
									208	GO:0030705	0.0497195	Inf	0.0497195	1	1	cytoskeleton-dependent intracellular transport
									209	GO:0051271	0.0497195	Inf	0.0497195	1	1	negative regulation of cellular component movement
									210	GO:2000146	0.0497195	Inf	0.0497195	1	1	negative regulation of cell motility
									211	GO:0044839	0.0497195	Inf	0.0497195	1	1	cell cycle G2/M phase transition
									212	GO:0040013	0.0497195	Inf	0.0497195	1	1	negative regulation of locomotion
									213	GO:0099111	0.0497195	Inf	0.0497195	1	1	microtubule-based transport
									214	GO:0099118	0.0497195	Inf	0.0497195	1	1	microtubule-based protein transport
									215	GO:0010970	0.0497195	Inf	0.0497195	1	1	transport along microtubule
									216	GO:0010972	0.0497195	Inf	0.0497195	1	1	negative regulation of G2/M transition of mitotic cell cycle
									217	GO:2000574	0.0497195	Inf	0.0497195	1	1	regulation of microtubule motor activity
									218	GO:2000575	0.0497195	Inf	0.0497195	1	1	negative regulation of microtubule motor activity
									219	GO:0000086	0.0497195	Inf	0.0497195	1	1	G2/M transition of mitotic cell cycle
									220	GO:0010389	0.0497195	Inf	0.0497195	1	1	regulation of G2/M transition of mitotic cell cycle
Cluster 6 Molecular function (MF)									Cluster 6 Biological process (BP)									Cluster 6 Cellular component (CC)
	GOMFID	Pvalue	OddsRatio	ExpCount	Count	Size	Term			GOBPID	Pvalue	OddsRatio	ExpCount	Count	Size	Term			GOCCID	Pvalue	OddsRatio	ExpCount	Count	Size	Term
1	GO:0042302	4.32e-89	14.7319	16.4351	136	385	structural constituent of cuticle		1	GO:0007186	3.59e-17	4.34165	16.0651	57	385	G-protein coupled receptor signaling pathway		1	GO:0016020	9.41e-26	3.03	203.062	306	4132	membrane
2	GO:0005198	1.16e-40	4.40839	44.2252	148	1036	structural molecule activity		2	GO:1901071	5.05e-16	5.03149	11.0578	45	265	glucosamine-containing compound metabolic process		2	GO:0016021	7.13e-15	2.23087	115.734	188	2355	integral component of membrane
3	GO:0099600	4.32e-24	3.94103	28.8574	93	676	transmembrane receptor activity		3	GO:0006030	5.05e-16	5.03149	11.0578	45	265	chitin metabolic process		3	GO:0031224	9.36e-15	2.22246	116.029	188	2361	intrinsic component of membrane
4	GO:0060089	8.91e-23	3.66215	31.7602	96	744	molecular transducer activity		4	GO:0006040	9.04e-16	4.94003	11.2247	45	269	amino sugar metabolic process		4	GO:0016011	3.19e-11	Inf	0.39315	8	8	dystroglycan complex
5	GO:0004872	8.91e-23	3.66215	31.7602	96	744	receptor activity		5	GO:0006811	7.11e-15	2.70817	42.729	97	1024	ion transport		5	GO:0016012	3.19e-11	Inf	0.39315	8	8	sarcoglycan complex
6	GO:0022838	8.99e-23	4.58955	19.594	73	459	substrate-specific channel activity		6	GO:0006022	1.59e-14	4.50885	12.101	45	290	aminoglycan metabolic process		6	GO:0044425	3.37e-11	1.95171	138.586	202	2820	membrane part
7	GO:0005216	8.99e-23	4.58955	19.594	73	459	ion channel activity		7	GO:0055085	1.51e-08	2.06693	48.1953	88	1155	transmembrane transport		7	GO:0090665	5.23e-07	17.5139	0.835445	8	17	glycoprotein complex
8	GO:0015267	7.21e-22	4.4026	20.277	73	475	channel activity		8	GO:1901135	1.15e-07	2.29736	28.1661	58	675	carbohydrate derivative metabolic process		8	GO:0016010	5.23e-07	17.5139	0.835445	8	17	dystrophin-associated glycoprotein complex
9	GO:0022803	7.21e-22	4.4026	20.277	73	475	passive transmembrane transporter activity		9	GO:0006810	1.02e-06	1.63369	104.027	149	2493	transport		9	GO:0005576	3.88e-06	1.98818	36.2681	64	738	extracellular region
10	GO:0015075	4.49e-19	2.99117	41.9628	106	983	ion transmembrane transporter activity		10	GO:0051234	1.18e-06	1.62856	104.277	149	2499	establishment of localization		10	GO:0098797	8.13e-06	10.5006	1.13031	8	23	plasma membrane protein complex
11	GO:0022891	1.08e-17	2.84043	43.8411	106	1027	substrate-specific transmembrane transporter activity		11	GO:0030001	9.53e-06	2.29932	18.5687	39	445	metal ion transport		11	GO:0045202	5.75e-05	19.57	0.491438	5	10	synapse
12	GO:0004930	1.51e-17	5.3126	10.9282	47	256	G-protein coupled receptor activity		12	GO:0051179	1.05e-05	1.5498	108.283	149	2595	localization		12	GO:0098791	5.75e-05	19.57	0.491438	5	10	Golgi subcompartment
13	GO:0008061	3.57e-16	5.04769	10.8856	45	255	chitin binding		13	GO:0007154	2.02e-05	1.73398	50.4903	80	1210	cell communication		13	GO:0031984	5.75e-05	19.57	0.491438	5	10	organelle subcompartment
14	GO:0004888	3.92e-16	3.31207	26.1253	74	612	transmembrane signaling receptor activity		14	GO:0007165	2.74e-05	1.73384	48.4874	77	1162	signal transduction		14	GO:0000124	0.00191652	3.09548	3.98065	11	81	SAGA complex
15	GO:0022892	1.69e-15	2.60862	47.1281	106	1104	substrate-specific transporter activity		15	GO:0051924	2.87e-05	13.9218	0.66764	6	16	regulation of calcium ion transport		15	GO:0005813	0.00240963	Inf	0.0982876	2	2	centrosome
16	GO:0022857	3.89e-15	2.39184	60.1907	124	1410	transmembrane transporter activity		16	GO:2001256	2.87e-05	13.9218	0.66764	6	16	regulation of store-operated calcium entry		16	GO:0005802	0.00240963	Inf	0.0982876	2	2	trans-Golgi network
17	GO:0038023	4.3e-15	3.0902	28.5159	76	668	signaling receptor activity		17	GO:0002115	2.87e-05	13.9218	0.66764	6	16	store-operated calcium entry		17	GO:0070461	0.00282913	2.9267	4.17722	11	85	SAGA-type complex
18	GO:0004871	6.96e-15	3.05806	28.772	76	674	signal transducer activity		18	GO:0023052	3.13e-05	1.72011	49.4888	78	1186	signaling		18	GO:0000408	0.0050913	7.09398	0.737157	4	15	EKC/KEOPS complex
19	GO:0005230	5.12e-14	5.55124	7.7693	35	182	extracellular ligand-gated ion channel activity		19	GO:0051049	3.78e-05	7.75452	1.33528	8	32	regulation of transport		19	GO:0005795	0.00548347	11.6856	0.39315	3	8	Golgi stack
20	GO:0015276	1.15e-13	4.80022	9.77566	39	229	ligand-gated ion channel activity		20	GO:0006816	3.78e-05	7.75452	1.33528	8	32	calcium ion transport		20	GO:0031248	0.0061727	2.60643	4.61952	11	94	protein acetyltransferase complex
21	GO:0022834	1.15e-13	4.80022	9.77566	39	229	ligand-gated channel activity		21	GO:0044700	4.75e-05	1.70115	49.2802	77	1181	single organism signaling		21	GO:1902493	0.0061727	2.60643	4.61952	11	94	acetyltransferase complex
22	GO:0005215	2.11e-12	2.15579	65.6975	124	1539	transporter activity		22	GO:0070838	0.0001154	6.41495	1.54392	8	37	divalent metal ion transport		22	GO:0000123	0.0061727	2.60643	4.61952	11	94	histone acetyltransferase complex
23	GO:0022836	7.2e-12	3.94426	12.1235	41	284	gated channel activity		23	GO:0044003	0.00057867	6.95531	1.08492	6	26	modification by symbiont of host morphology or physiology		23	GO:0044459	0.00663267	2.72854	4.02979	10	82	plasma membrane part
24	GO:0001653	7.28e-10	10.3805	2.04905	15	48	peptide receptor activity		24	GO:0019048	0.00057867	6.95531	1.08492	6	26	modulation by virus of host morphology or physiology		24	GO:0005581	0.00699313	38.8777	0.147431	2	3	collagen trimer
25	GO:0008528	7.28e-10	10.3805	2.04905	15	48	G-protein coupled peptide receptor activity		25	GO:0035821	0.00057867	6.95531	1.08492	6	26	modification of morphology or physiology of other organism		25	GO:0097458	0.013532	19.4365	0.196575	2	4	neuron part
26	GO:0008907	2.7e-08	52.8085	0.426885	7	10	integrase activity		26	GO:0051817	0.00057867	6.95531	1.08492	6	26	modification of morphology or physiology of other organism involved in symbiotic interaction		26	GO:0098793	0.013532	19.4365	0.196575	2	4	presynapse
27	GO:0046873	3.7e-06	2.45596	16.4351	37	385	metal ion transmembrane transporter activity		27	GO:0072511	0.00065141	4.76626	1.96119	8	47	divalent inorganic cation transport		27	GO:0044456	0.013532	19.4365	0.196575	2	4	synapse part
28	GO:0004970	1.04e-05	3.66796	5.5495	18	130	ionotropic glutamate receptor activity		28	GO:0032879	0.00075362	4.64673	2.00292	8	48	regulation of localization		28	GO:0048786	0.013532	19.4365	0.196575	2	4	presynaptic active zone
29	GO:0030594	1.04e-05	3.66796	5.5495	18	130	neurotransmitter receptor activity		29	GO:0043066	0.00088208	6.32199	1.16837	6	28	negative regulation of apoptotic process		29	GO:0042470	0.0186028	6.48878	0.589726	3	12	melanosome
30	GO:0022824	1.04e-05	3.66796	5.5495	18	130	transmitter-gated ion channel activity		30	GO:0043069	0.00088208	6.32199	1.16837	6	28	negative regulation of programmed cell death		30	GO:0048770	0.0186028	6.48878	0.589726	3	12	pigment granule
31	GO:0022835	1.04e-05	3.66796	5.5495	18	130	transmitter-gated channel activity		31	GO:0060548	0.00088208	6.32199	1.16837	6	28	negative regulation of cell death		31	GO:0009986	0.0218239	12.956	0.245719	2	5	cell surface
32	GO:0008066	1.04e-05	3.66796	5.5495	18	130	glutamate receptor activity		32	GO:0051259	0.00095361	3.37193	3.63029	11	87	protein oligomerization		32	GO:0044284	0.0316815	9.71583	0.294863	2	6	mitochondrial crista junction
33	GO:0008146	0.0001194	5.50882	1.96367	9	46	sulfotransferase activity		33	GO:0043269	0.0012952	5.79423	1.25183	6	30	regulation of ion transport		33	GO:0030176	0.0377786	2.60274	2.50633	6	51	integral component of endoplasmic reticulum membrane
34	GO:0022890	0.00026903	1.84686	25.3143	44	593	inorganic cation transmembrane transporter activity		34	GO:0010959	0.0012952	5.79423	1.25183	6	30	regulation of metal ion transport		34	GO:0031227	0.0377786	2.60274	2.50633	6	51	intrinsic component of endoplasmic reticulum membrane
35	GO:0020037	0.00035129	2.09479	15.2825	30	358	heme binding		35	GO:0009847	0.00158628	10.275	0.542458	4	13	spore germination
36	GO:0046906	0.00050796	2.04393	15.624	30	366	tetrapyrrole binding		36	GO:0090002	0.00173811	Inf	0.083455	2	2	establishment of protein localization to plasma membrane
37	GO:0016782	0.00056116	4.33415	2.39055	9	56	transferase activity, transferring sulfur-containing groups		37	GO:0090003	0.00173811	Inf	0.083455	2	2	regulation of establishment of protein localization to plasma membrane
38	GO:0004984	0.00075792	2.26955	10.3733	22	243	olfactory receptor activity		38	GO:0090004	0.00173811	Inf	0.083455	2	2	positive regulation of establishment of protein localization to plasma membrane
39	GO:0008324	0.0007908	1.72149	28.2171	46	661	cation transmembrane transporter activity		39	GO:0060627	0.00173811	Inf	0.083455	2	2	regulation of vesicle-mediated transport
40	GO:0016805	0.00085469	12.8778	0.469573	4	11	dipeptidase activity		40	GO:0098739	0.00173811	Inf	0.083455	2	2	import across plasma membrane
41	GO:0043027	0.00181999	Inf	0.0853769	2	2	cysteine-type endopeptidase inhibitor activity involved in apoptotic process		41	GO:0019049	0.00173811	Inf	0.083455	2	2	evasion or tolerance of host defenses by virus
42	GO:0043028	0.00181999	Inf	0.0853769	2	2	cysteine-type endopeptidase regulator activity involved in apoptotic process		42	GO:0098703	0.00173811	Inf	0.083455	2	2	calcium ion import across plasma membrane
43	GO:0004896	0.00181999	Inf	0.0853769	2	2	cytokine receptor activity		43	GO:0002532	0.00173811	Inf	0.083455	2	2	production of molecular mediator involved in inflammatory response
44	GO:0008373	0.00181999	Inf	0.0853769	2	2	sialyltransferase activity		44	GO:0098876	0.00173811	Inf	0.083455	2	2	vesicle-mediated transport to the plasma membrane
45	GO:0005185	0.00181999	Inf	0.0853769	2	2	neurohypophyseal hormone activity		45	GO:0099587	0.00173811	Inf	0.083455	2	2	inorganic ion import into cell
46	GO:0008455	0.00181999	Inf	0.0853769	2	2	alpha-1,6-mannosylglycoprotein 2-beta-N-acetylglucosaminyltransferase activity		46	GO:1990035	0.00173811	Inf	0.083455	2	2	calcium ion import into cell
47	GO:0071253	0.00181999	Inf	0.0853769	2	2	connexin binding		47	GO:0006892	0.00173811	Inf	0.083455	2	2	post-Golgi vesicle-mediated transport
48	GO:0016705	0.00237698	1.90115	14.9837	27	351	oxidoreductase activity, acting on paired donors, with incorporation or reduction of molecular oxygen		48	GO:0006893	0.00173811	Inf	0.083455	2	2	Golgi to plasma membrane transport
49	GO:0000989	0.00340903	2.16362	8.83651	18	207	transcription factor activity, transcription factor binding		49	GO:0042996	0.00173811	Inf	0.083455	2	2	regulation of Golgi to plasma membrane protein transport
50	GO:0003712	0.00340903	2.16362	8.83651	18	207	transcription cofactor activity		50	GO:0042998	0.00173811	Inf	0.083455	2	2	positive regulation of Golgi to plasma membrane protein transport
51	GO:0016614	0.00378507	2.00684	11.0563	21	259	oxidoreductase activity, acting on CH-OH group of donors		51	GO:0098657	0.00173811	Inf	0.083455	2	2	import into cell
52	GO:0005138	0.00530497	44.968	0.128065	2	3	interleukin-6 receptor binding		52	GO:0098659	0.00173811	Inf	0.083455	2	2	inorganic cation import into cell
53	GO:0051424	0.00530497	44.968	0.128065	2	3	corticotropin-releasing hormone binding		53	GO:1902656	0.00173811	Inf	0.083455	2	2	calcium ion import into cytosol
54	GO:0017046	0.00530497	44.968	0.128065	2	3	peptide hormone binding		54	GO:0051480	0.00173811	Inf	0.083455	2	2	regulation of cytosolic calcium ion concentration
55	GO:0004222	0.0086975	2.17222	6.83015	14	160	metalloendopeptidase activity		55	GO:0060341	0.00173811	Inf	0.083455	2	2	regulation of cellular localization
56	GO:0005201	0.00988582	8.43925	0.469573	3	11	extracellular matrix structural constituent		56	GO:0072659	0.00173811	Inf	0.083455	2	2	protein localization to plasma membrane
57	GO:0005506	0.0101859	1.68341	16.7339	27	392	iron ion binding		57	GO:1904951	0.00173811	Inf	0.083455	2	2	positive regulation of establishment of protein localization
58	GO:0004557	0.0103098	22.4827	0.170754	2	4	alpha-galactosidase activity		58	GO:0060402	0.00173811	Inf	0.083455	2	2	calcium ion transport into cytosol
59	GO:0016435	0.0103098	22.4827	0.170754	2	4	rRNA (guanine) methyltransferase activity		59	GO:0007204	0.00173811	Inf	0.083455	2	2	positive regulation of cytosolic calcium ion concentration
60	GO:0015925	0.0127681	7.50111	0.512262	3	12	galactosidase activity		60	GO:1903729	0.00173811	Inf	0.083455	2	2	regulation of plasma membrane organization
61	GO:0000988	0.0129371	1.83421	10.8429	19	254	transcription factor activity, protein binding		61	GO:0051222	0.00173811	Inf	0.083455	2	2	positive regulation of protein transport
62	GO:0008200	0.0130427	5.00475	0.939146	4	22	ion channel inhibitor activity		62	GO:0051223	0.00173811	Inf	0.083455	2	2	regulation of protein transport
63	GO:0016248	0.0130427	5.00475	0.939146	4	22	channel inhibitor activity		63	GO:0043001	0.00173811	Inf	0.083455	2	2	Golgi to plasma membrane protein transport
64	GO:0016491	0.0130592	1.3476	56.3061	73	1319	oxidoreductase activity		64	GO:1904375	0.00173811	Inf	0.083455	2	2	regulation of protein localization to cell periphery
65	GO:0033764	0.0133755	2.40437	4.4396	10	104	steroid dehydrogenase activity, acting on the CH-OH group of donors, NAD or NADP as acceptor		65	GO:1904377	0.00173811	Inf	0.083455	2	2	positive regulation of protein localization to cell periphery
66	GO:0016229	0.0133755	2.40437	4.4396	10	104	steroid dehydrogenase activity		66	GO:1905475	0.00173811	Inf	0.083455	2	2	regulation of protein localization to membrane
67	GO:0003854	0.0133755	2.40437	4.4396	10	104	3-beta-hydroxy-delta5-steroid dehydrogenase activity		67	GO:1905477	0.00173811	Inf	0.083455	2	2	positive regulation of protein localization to membrane
68	GO:0042562	0.0166988	14.9876	0.213442	2	5	hormone binding		68	GO:1903827	0.00173811	Inf	0.083455	2	2	regulation of cellular protein localization
69	GO:0016620	0.0174001	3.14627	2.09173	6	49	oxidoreductase activity, acting on the aldehyde or oxo group of donors, NAD or NADP as acceptor		69	GO:1903829	0.00173811	Inf	0.083455	2	2	positive regulation of cellular protein localization
70	GO:0016247	0.0177156	4.50374	1.02452	4	24	channel regulator activity		70	GO:0070201	0.00173811	Inf	0.083455	2	2	regulation of establishment of protein localization
71	GO:0099106	0.0177156	4.50374	1.02452	4	24	ion channel regulator activity		71	GO:1990778	0.00173811	Inf	0.083455	2	2	protein localization to cell periphery
72	GO:0005261	0.0196729	1.94369	7.55586	14	177	cation channel activity		72	GO:0097553	0.00173811	Inf	0.083455	2	2	calcium ion transmembrane import into cytosol
73	GO:0015269	0.0198269	6.13655	0.597639	3	14	calcium-activated potassium channel activity		73	GO:0032880	0.00173811	Inf	0.083455	2	2	regulation of protein localization
74	GO:0022839	0.0198269	6.13655	0.597639	3	14	ion gated channel activity		74	GO:1903076	0.00173811	Inf	0.083455	2	2	regulation of protein localization to plasma membrane
75	GO:0005227	0.0198269	6.13655	0.597639	3	14	calcium activated cation channel activity		75	GO:1903078	0.00173811	Inf	0.083455	2	2	positive regulation of protein localization to plasma membrane
76	GO:0015294	0.0208706	3.00608	2.17711	6	51	solute:cation symporter activity		76	GO:0090087	0.00173811	Inf	0.083455	2	2	regulation of peptide transport
77	GO:0004869	0.024345	11.24	0.256131	2	6	cysteine-type endopeptidase inhibitor activity		77	GO:0051260	0.00184177	5.34766	1.33528	6	32	protein homooligomerization
78	GO:0004602	0.024345	11.24	0.256131	2	6	glutathione peroxidase activity		78	GO:0006915	0.00330064	3.57096	2.50365	8	60	apoptotic process
79	GO:0022804	0.0257522	1.82497	8.58038	15	201	active transmembrane transporter activity		79	GO:0012501	0.00330064	3.57096	2.50365	8	60	programmed cell death
80	GO:0015291	0.0268033	2.37521	3.58583	8	84	secondary active transmembrane transporter activity		80	GO:0008219	0.00330064	3.57096	2.50365	8	60	cell death
81	GO:0019905	0.0331295	8.99147	0.298819	2	7	syntaxin binding		81	GO:0051297	0.00345758	13.85	0.33382	3	8	centrosome organization
82	GO:0008121	0.0331295	8.99147	0.298819	2	7	ubiquinol-cytochrome-c reductase activity		82	GO:0007098	0.00345758	13.85	0.33382	3	8	centrosome cycle
83	GO:0016681	0.0331295	8.99147	0.298819	2	7	oxidoreductase activity, acting on diphenols and related substances as donors, cytochrome as acceptor		83	GO:0006954	0.00506979	46.0961	0.125183	2	3	inflammatory response
84	GO:0000149	0.0331295	8.99147	0.298819	2	7	SNARE binding		84	GO:0006812	0.00604865	1.55296	29.7934	44	714	cation transport
85	GO:0046961	0.0391869	4.49907	0.768392	3	18	proton-transporting ATPase activity, rotational mechanism		85	GO:0051262	0.0069602	9.89127	0.417275	3	10	protein tetramerization
86	GO:0036442	0.0391869	4.49907	0.768392	3	18	hydrogen-exporting ATPase activity		86	GO:0042262	0.00704829	6.16203	0.792823	4	19	DNA protection
87	GO:0004383	0.0415459	3.33472	1.32334	4	31	guanylate cyclase activity		87	GO:0065007	0.00718514	1.28077	128.396	153	3077	biological regulation
88	GO:0005267	0.0418341	2.81526	1.92098	5	45	potassium channel activity		88	GO:0006836	0.00750171	3.85909	1.75256	6	42	neurotransmitter transport
89	GO:0008704	0.0426885	Inf	0.0426885	1	1	5-carboxymethyl-2-hydroxymuconate delta-isomerase activity		89	GO:0050896	0.00841927	1.32285	83.3716	104	1998	response to stimulus
90	GO:0008887	0.0426885	Inf	0.0426885	1	1	glycerate kinase activity		90	GO:0006629	0.00855686	1.59936	22.9501	35	550	lipid metabolic process
91	GO:0016863	0.0426885	Inf	0.0426885	1	1	intramolecular oxidoreductase activity, transposing C=C bonds		91	GO:0031167	0.0098595	23.0462	0.16691	2	4	rRNA methylation
92	GO:0004601	0.0429417	7.49244	0.341508	2	8	peroxidase activity		92	GO:0000154	0.0098595	23.0462	0.16691	2	4	rRNA modification
93	GO:0031369	0.0429417	7.49244	0.341508	2	8	translation initiation factor binding		93	GO:0070475	0.0098595	23.0462	0.16691	2	4	rRNA base methylation
94	GO:0051287	0.0433187	1.81915	6.87284	12	161	NAD binding		94	GO:0070476	0.0098595	23.0462	0.16691	2	4	rRNA (guanine-N7)-methylation
95	GO:0016896	0.0451008	4.21762	0.811081	3	19	exoribonuclease activity, producing 5'-phosphomonoesters		95	GO:0036265	0.0098595	23.0462	0.16691	2	4	RNA (guanine-N7)-methylation
96	GO:0004532	0.0451008	4.21762	0.811081	3	19	exoribonuclease activity		96	GO:0050789	0.00998584	1.27293	119.174	142	2856	regulation of biological process
97	GO:0004535	0.0451008	4.21762	0.811081	3	19	poly(A)-specific ribonuclease activity		97	GO:0042981	0.0104887	3.56138	1.87774	6	45	regulation of apoptotic process
98	GO:0000175	0.0451008	4.21762	0.811081	3	19	3'-5'-exoribonuclease activity		98	GO:0043067	0.0104887	3.56138	1.87774	6	45	regulation of programmed cell death
									99	GO:0010941	0.0104887	3.56138	1.87774	6	45	regulation of cell death
									100	GO:0008610	0.0108891	1.81094	12.1844	21	292	lipid biosynthetic process
									101	GO:0052200	0.0120512	5.13379	0.918005	4	22	response to host defenses
									102	GO:0044413	0.0120512	5.13379	0.918005	4	22	avoidance of host defenses
									103	GO:0044415	0.0120512	5.13379	0.918005	4	22	evasion or tolerance of host defenses
									104	GO:0051832	0.0120512	5.13379	0.918005	4	22	avoidance of defenses of other organism involved in symbiotic interaction
									105	GO:0051834	0.0120512	5.13379	0.918005	4	22	evasion or tolerance of defenses of other organism involved in symbiotic interaction
									106	GO:0075136	0.0120512	5.13379	0.918005	4	22	response to host
									107	GO:0052173	0.0120512	5.13379	0.918005	4	22	response to defenses of other organism involved in symbiotic interaction
									108	GO:0055114	0.0143833	1.35605	54.1206	70	1297	oxidation-reduction process
									109	GO:0051716	0.0144328	1.32332	66.7223	84	1599	cellular response to stimulus
									110	GO:0044802	0.0154207	2.48515	3.88066	9	93	single-organism membrane organization
									111	GO:0071496	0.0163951	4.61967	1.00146	4	24	cellular response to external stimulus
									112	GO:0009991	0.0163951	4.61967	1.00146	4	24	response to extracellular stimulus
									113	GO:0031668	0.0163951	4.61967	1.00146	4	24	cellular response to extracellular stimulus
									114	GO:0006694	0.0165305	2.32083	4.59003	10	110	steroid biosynthetic process
									115	GO:0008202	0.0185421	2.27495	4.67348	10	112	steroid metabolic process
									116	GO:0070509	0.0233129	11.5213	0.250365	2	6	calcium ion import
									117	GO:0060401	0.0233129	11.5213	0.250365	2	6	cytosolic calcium ion transport
									118	GO:0008653	0.0269731	5.3235	0.66764	3	16	lipopolysaccharide metabolic process
									119	GO:0009103	0.0269731	5.3235	0.66764	3	16	lipopolysaccharide biosynthetic process
									120	GO:0044068	0.0317461	9.21627	0.292093	2	7	modulation by symbiont of host cellular process
									121	GO:0052248	0.0317461	9.21627	0.292093	2	7	modulation of programmed cell death in other organism involved in symbiotic interaction
									122	GO:0019050	0.0317461	9.21627	0.292093	2	7	suppression by virus of host apoptotic process
									123	GO:0019054	0.0317461	9.21627	0.292093	2	7	modulation by virus of host process
									124	GO:0033668	0.0317461	9.21627	0.292093	2	7	negative regulation by symbiont of host apoptotic process
									125	GO:0052040	0.0317461	9.21627	0.292093	2	7	modulation by symbiont of host programmed cell death
									126	GO:0052041	0.0317461	9.21627	0.292093	2	7	negative regulation by symbiont of host programmed cell death
									127	GO:0052490	0.0317461	9.21627	0.292093	2	7	negative regulation by organism of programmed cell death in other organism involved in symbiotic interaction
									128	GO:0052433	0.0317461	9.21627	0.292093	2	7	modulation by organism of apoptotic process in other organism involved in symbiotic interaction
									129	GO:0044531	0.0317461	9.21627	0.292093	2	7	modulation of programmed cell death in other organism
									130	GO:0044532	0.0317461	9.21627	0.292093	2	7	modulation of apoptotic process in other organism
									131	GO:0052150	0.0317461	9.21627	0.292093	2	7	modulation by symbiont of host apoptotic process
									132	GO:0039526	0.0317461	9.21627	0.292093	2	7	modulation by virus of host apoptotic process
									133	GO:0046068	0.03866	3.42005	1.29355	4	31	cGMP metabolic process
									134	GO:0006182	0.03866	3.42005	1.29355	4	31	cGMP biosynthetic process
									135	GO:0044699	0.0394828	1.17429	206.968	227	4960	single-organism process
									136	GO:0031388	0.0417275	Inf	0.0417275	1	1	organic acid phosphorylation
									137	GO:0008299	0.0427781	3.29764	1.33528	4	32	isoprenoid biosynthetic process
Cluster 7 Molecular function (MF)									Cluster 7 Biological process (BP)									Cluster 7 Cellular component (CC)
	GOMFID	Pvalue	OddsRatio	ExpCount	Count	Size	Term			GOBPID	Pvalue	OddsRatio	ExpCount	Count	Size	Term			GOCCID	Pvalue	OddsRatio	ExpCount	Count	Size	Term
1	GO:0005488	3.66e-26	2.72715	491.416	613	11990	binding		1	GO:0009987	9.82e-21	2.5378	312.265	411	7740	cellular process		1	GO:1990234	3.47e-05	2.14069	21.3	41	547	transferase complex
2	GO:0005515	1.77e-23	2.22592	175.336	294	4278	protein binding		2	GO:0050794	4.73e-16	2.19522	111.108	190	2754	regulation of cellular process		2	GO:0005672	3.99e-05	3.29782	6.15247	18	158	transcription factor TFIIA complex
3	GO:0003700	5.96e-17	3.7971	20.2468	65	494	transcription factor activity, sequence-specific DNA binding		3	GO:0065007	7.11e-16	2.14493	124.139	205	3077	biological regulation		3	GO:0061695	4.47e-05	2.45883	13.0837	29	336	transferase complex, transferring phosphorus-containing groups
4	GO:0001071	5.96e-17	3.7971	20.2468	65	494	nucleic acid binding transcription factor activity		4	GO:0050789	9.92e-16	2.16343	115.223	194	2856	regulation of biological process		4	GO:0016591	7.41e-05	2.56644	10.7863	25	277	DNA-directed RNA polymerase II, holoenzyme
5	GO:0008047	5.51e-06	4.8929	3.36081	14	82	enzyme activator activity		5	GO:0010468	6.18e-13	2.32701	58.2571	114	1444	regulation of gene expression		5	GO:0016459	0.000240332	4.43337	2.60896	10	67	myosin complex
6	GO:0004725	8.01e-06	5.58177	2.58208	12	63	protein tyrosine phosphatase activity		6	GO:0044237	8.51e-13	1.89022	231.536	311	5739	cellular metabolic process		6	GO:0000428	0.000304863	2.3188	11.7987	25	303	DNA-directed RNA polymerase complex
7	GO:0003774	1.25e-05	3.60425	5.61501	18	137	motor activity		7	GO:0060255	8.99e-13	2.29601	60.0726	116	1489	regulation of macromolecule metabolic process		7	GO:0055029	0.000304863	2.3188	11.7987	25	303	nuclear DNA-directed RNA polymerase complex
8	GO:0004842	1.71e-05	3.03767	7.99217	22	195	ubiquitin-protein transferase activity		8	GO:0006139	1.94e-12	1.90867	148.709	222	3686	nucleobase-containing compound metabolic process		8	GO:0030173	0.000393533	16.6423	0.389397	4	10	integral component of Golgi membrane
9	GO:0019787	1.71e-05	3.03767	7.99217	22	195	ubiquitin-like protein transferase activity		9	GO:0006725	2.44e-12	1.89781	152.622	226	3783	cellular aromatic compound metabolic process		9	GO:0031228	0.000393533	16.6423	0.389397	4	10	intrinsic component of Golgi membrane
10	GO:0005096	2.11e-05	4.99244	2.828	12	69	GTPase activator activity		10	GO:1903506	2.89e-12	2.31784	54.4244	107	1349	regulation of nucleic acid-templated transcription		10	GO:0030880	0.000497101	2.23546	12.1881	25	313	RNA polymerase complex
11	GO:0004721	2.46e-05	4.90607	2.86898	12	70	phosphoprotein phosphatase activity		11	GO:0006355	2.89e-12	2.31784	54.4244	107	1349	regulation of transcription, DNA-templated		11	GO:0005667	0.00146033	2.2094	10.2801	21	264	transcription factor complex
12	GO:0061659	2.85e-05	4.82263	2.90997	12	71	ubiquitin-like protein ligase activity		12	GO:0046483	3.4e-12	1.89054	152.179	225	3772	heterocycle metabolic process		12	GO:1902911	0.00151191	Inf	0.0778794	2	2	protein kinase complex
13	GO:0061630	2.85e-05	4.82263	2.90997	12	71	ubiquitin protein ligase activity		13	GO:2001141	3.49e-12	2.30958	54.5858	107	1353	regulation of RNA biosynthetic process		13	GO:0001726	0.00151191	Inf	0.0778794	2	2	ruffle
14	GO:0008092	2.92e-05	2.58641	11.353	27	277	cytoskeletal protein binding		14	GO:0051252	3.49e-12	2.30958	54.5858	107	1353	regulation of RNA metabolic process		14	GO:0005891	0.00151191	Inf	0.0778794	2	2	voltage-gated calcium channel complex
15	GO:1901363	6.37e-05	1.3462	277.062	327	6760	heterocyclic compound binding		15	GO:0019222	3.75e-12	2.23726	61.3636	116	1521	regulation of metabolic process		15	GO:1902554	0.00151191	Inf	0.0778794	2	2	serine/threonine protein kinase complex
16	GO:0097159	6.63e-05	1.34519	277.185	327	6763	organic cyclic compound binding		16	GO:0090304	6.71e-12	1.89571	137.937	208	3419	nucleic acid metabolic process		16	GO:1990316	0.00151191	Inf	0.0778794	2	2	ATG1/ULK1 kinase complex
17	GO:0030695	7.43e-05	4.30935	3.19687	12	78	GTPase regulator activity		17	GO:0044260	7.12e-12	1.84023	192.119	267	4762	cellular macromolecule metabolic process		17	GO:0031252	0.00151191	Inf	0.0778794	2	2	cell leading edge
18	GO:0016818	7.93e-05	1.72506	40.8625	66	997	hydrolase activity, acting on acid anhydrides, in phosphorus-containing anhydrides		18	GO:0019219	8.33e-12	2.27105	55.3523	107	1372	regulation of nucleobase-containing compound metabolic process		18	GO:1902494	0.00219056	1.663	29.2437	45	751	catalytic complex
19	GO:0004882	7.97e-05	10.8816	0.778724	6	19	androgen receptor activity		19	GO:2000112	1.43e-11	2.2473	55.8365	107	1384	regulation of cellular macromolecule biosynthetic process		19	GO:0090575	0.00255063	2.14286	10.0464	20	258	RNA polymerase II transcription factor complex
20	GO:0004879	7.97e-05	10.8816	0.778724	6	19	RNA polymerase II transcription factor activity, ligand-activated sequence-specific DNA binding		20	GO:1901360	1.64e-11	1.84665	157.141	228	3895	organic cyclic compound metabolic process		20	GO:0044798	0.00266797	2.13362	10.0854	20	259	nuclear transcription factor complex
21	GO:0098531	7.97e-05	10.8816	0.778724	6	19	transcription factor activity, direct ligand regulated sequence-specific DNA binding		21	GO:0010556	1.71e-11	2.23948	55.9978	107	1388	regulation of macromolecule biosynthetic process		21	GO:0000776	0.00501383	2.43276	5.76308	13	148	kinetochore
22	GO:0003993	9.23e-05	4.56997	2.78701	11	68	acid phosphatase activity		22	GO:0031326	1.71e-11	2.23948	55.9978	107	1388	regulation of cellular biosynthetic process		22	GO:0000775	0.0053813	2.24693	7.16491	15	184	chromosome, centromeric region
23	GO:0005496	0.000109862	10.1038	0.819709	6	20	steroid binding		23	GO:0009889	2.03e-11	2.23171	56.1592	107	1392	regulation of biosynthetic process		23	GO:0098687	0.0053813	2.24693	7.16491	15	184	chromosomal region
24	GO:0003707	0.000109862	10.1038	0.819709	6	20	steroid hormone receptor activity		24	GO:0051171	2.53e-11	2.22207	56.3609	107	1397	regulation of nitrogen compound metabolic process		24	GO:0015629	0.0058007	2.76534	3.93291	10	101	actin cytoskeleton
25	GO:0032553	0.000139976	1.52096	73.241	104	1787	ribonucleotide binding		25	GO:0080090	2.62e-11	2.20562	57.894	109	1435	regulation of primary metabolic process		25	GO:0012510	0.00860999	24.8242	0.155759	2	4	trans-Golgi network transport vesicle membrane
26	GO:0060589	0.000140065	3.3286	5.00023	15	122	nucleoside-triphosphatase regulator activity		26	GO:0031323	3.11e-11	2.1982	58.0554	109	1439	regulation of cellular metabolic process		26	GO:0005905	0.00860999	24.8242	0.155759	2	4	clathrin-coated pit
27	GO:0072509	0.000147982	4.73146	2.45913	10	60	divalent inorganic cation transmembrane transporter activity		27	GO:0006351	6.64e-11	2.04906	74.3141	129	1842	transcription, DNA-templated		27	GO:0030665	0.00860999	24.8242	0.155759	2	4	clathrin-coated vesicle membrane
28	GO:0017076	0.000169205	1.51198	73.6099	104	1796	purine nucleotide binding		28	GO:0097659	6.64e-11	2.04906	74.3141	129	1842	nucleic acid-templated transcription		28	GO:0030125	0.00860999	24.8242	0.155759	2	4	clathrin vesicle coat
29	GO:0016817	0.000196989	1.6644	42.174	66	1029	hydrolase activity, acting on acid anhydrides		29	GO:0032774	1.11e-10	2.02981	74.879	129	1856	RNA biosynthetic process		29	GO:0030140	0.00860999	24.8242	0.155759	2	4	trans-Golgi network transport vesicle
30	GO:0008138	0.000201347	5.06472	2.09026	9	51	protein tyrosine/serine/threonine phosphatase activity		30	GO:0019438	6.67e-10	1.92704	84.2388	138	2088	aromatic compound biosynthetic process		30	GO:0030130	0.00860999	24.8242	0.155759	2	4	clathrin coat of trans-Golgi network vesicle
31	GO:0043167	0.000222812	1.32714	224.15	268	5469	ion binding		31	GO:0034654	8.43e-10	1.93377	81.2534	134	2014	nucleobase-containing compound biosynthetic process		31	GO:0030132	0.00860999	24.8242	0.155759	2	4	clathrin coat of coated pit
32	GO:0032555	0.000235056	1.50175	72.5443	102	1770	purine ribonucleotide binding		32	GO:0018130	1.85e-09	1.89432	84.6826	137	2099	heterocycle biosynthetic process		32	GO:0030136	0.00860999	24.8242	0.155759	2	4	clathrin-coated vesicle
33	GO:0004672	0.000239751	1.91909	22.1731	40	541	protein kinase activity		33	GO:0034641	3.41e-09	1.7033	169.244	232	4195	cellular nitrogen compound metabolic process		33	GO:0033177	0.0133038	2.20538	5.80202	12	149	proton-transporting two-sector ATPase complex, proton-transporting domain
34	GO:0016462	0.000266405	1.66372	40.2067	63	981	pyrophosphatase activity		34	GO:1901362	9.78e-09	1.82484	89.3626	140	2215	organic cyclic compound biosynthetic process		34	GO:0044431	0.0151489	2.67292	3.232	8	83	Golgi apparatus part
35	GO:0042578	0.000285019	2.30372	11.6399	25	284	phosphoric ester hydrolase activity		35	GO:0015074	4.2e-08	4.38953	6.13233	23	152	DNA integration		35	GO:0042600	0.0171373	4.52993	1.01243	4	26	chorion
36	GO:0000981	0.000331584	7.85661	0.983651	6	24	RNA polymerase II transcription factor activity, sequence-specific DNA binding		36	GO:0016070	7.73e-08	1.71463	105.178	155	2607	RNA metabolic process		36	GO:0030658	0.0194024	3.05935	2.14168	6	55	transport vesicle membrane
37	GO:0008017	0.000443135	2.83455	6.14782	16	150	microtubule binding		37	GO:0006807	4.65e-07	1.56435	185.987	240	4610	nitrogen compound metabolic process		37	GO:0034704	0.020437	12.4091	0.233638	2	6	calcium channel complex
38	GO:0017111	0.000500764	1.63233	39.551	61	965	nucleoside-triphosphatase activity		38	GO:0007165	6.18e-07	1.92508	46.88	81	1162	signal transduction		38	GO:0072669	0.020437	12.4091	0.233638	2	6	tRNA-splicing ligase complex
39	GO:0035639	0.000523485	1.46757	72.4623	100	1768	purine ribonucleoside triphosphate binding		39	GO:0050896	8.29e-07	1.71246	80.6079	122	1998	response to stimulus		39	GO:0034702	0.0224742	5.73837	0.623035	3	16	ion channel complex
40	GO:0016715	0.000733141	13.4397	0.45084	4	11	oxidoreductase activity, acting on paired donors, with incorporation or reduction of molecular oxygen, reduced ascorbate as one donor, and incorporation of one atom of oxygen		40	GO:0044700	1.19e-06	1.88867	47.6466	81	1181	single organism signaling		40	GO:0034703	0.0224742	5.73837	0.623035	3	16	cation channel complex
41	GO:0015631	0.000741666	2.51531	7.70527	18	188	tubulin binding		41	GO:0023052	1.41e-06	1.8793	47.8483	81	1186	signaling		41	GO:0005634	0.023482	1.27339	101.01	118	2594	nucleus
42	GO:0008171	0.00106419	11.7591	0.491826	4	12	O-methyltransferase activity		42	GO:0051716	2.16e-06	1.7476	64.5105	101	1599	cellular response to stimulus		42	GO:0005794	0.0250375	2.41291	3.54351	8	91	Golgi apparatus
43	GO:0043565	0.0011956	2.10121	12.1317	24	296	sequence-specific DNA binding		43	GO:0034645	3.05e-06	1.58943	110.543	154	2740	cellular macromolecule biosynthetic process		43	GO:0043227	0.0254385	1.25581	127.45	145	3273	membrane-bounded organelle
44	GO:0016791	0.00136513	2.2526	9.46764	20	231	phosphatase activity		44	GO:0007154	3.09e-06	1.83547	48.8166	81	1210	cell communication		44	GO:0000139	0.0278314	3.83114	1.16819	4	30	Golgi membrane
45	GO:0005381	0.00167758	Inf	0.0819709	2	2	iron ion transmembrane transporter activity		45	GO:0044271	3.75e-06	1.59611	103.846	146	2574	cellular nitrogen compound biosynthetic process		45	GO:0031965	0.0278829	9.92606	0.272578	2	7	nuclear membrane
46	GO:0030551	0.00167758	Inf	0.0819709	2	2	cyclic nucleotide binding		46	GO:0009059	4.59e-06	1.57481	111.31	154	2759	macromolecule biosynthetic process		46	GO:0033179	0.0297001	2.32788	3.66033	8	94	proton-transporting V-type ATPase, V0 domain
47	GO:0030553	0.00167758	Inf	0.0819709	2	2	cGMP binding		47	GO:0010467	6.27e-06	1.54239	125.39	169	3108	gene expression		47	GO:0043231	0.0298669	1.247	124.14	141	3188	intracellular membrane-bounded organelle
48	GO:0008852	0.00167758	Inf	0.0819709	2	2	exodeoxyribonuclease I activity		48	GO:0045595	1.27e-05	95.8695	0.201721	4	5	regulation of cell differentiation		48	GO:0030662	0.0306597	2.72359	2.37532	6	61	coated vesicle membrane
49	GO:0015093	0.00167758	Inf	0.0819709	2	2	ferrous iron transmembrane transporter activity		49	GO:0006796	1.76e-05	1.86706	36.8343	63	913	phosphate-containing compound metabolic process		49	GO:0030659	0.0306597	2.72359	2.37532	6	61	cytoplasmic vesicle membrane
50	GO:0003726	0.00167758	Inf	0.0819709	2	2	double-stranded RNA adenosine deaminase activity		50	GO:0006793	1.88e-05	1.86236	36.915	63	915	phosphorus metabolic process		50	GO:0030120	0.0306597	2.72359	2.37532	6	61	vesicle coat
51	GO:0004514	0.00167758	Inf	0.0819709	2	2	nicotinate-nucleotide diphosphorylase (carboxylating) activity		51	GO:0016311	2.06e-05	5.01311	2.8241	12	70	dephosphorylation		51	GO:0030135	0.0306597	2.72359	2.37532	6	61	coated vesicle
52	GO:0031005	0.00167758	Inf	0.0819709	2	2	filamin binding		52	GO:0006468	2.28e-05	2.20249	19.2846	39	478	protein phosphorylation		52	GO:0005680	0.0334141	2.14657	4.43913	9	114	anaphase-promoting complex
53	GO:0004420	0.00167758	Inf	0.0819709	2	2	hydroxymethylglutaryl-CoA reductase (NADPH) activity		53	GO:0048513	3.68e-05	47.9309	0.242066	4	6	animal organ development		53	GO:0000152	0.0334141	2.14657	4.43913	9	114	nuclear ubiquitin ligase complex
54	GO:0005245	0.00167758	Inf	0.0819709	2	2	voltage-gated calcium channel activity		54	GO:0044249	4.04e-05	1.4773	129.344	169	3206	cellular biosynthetic process		54	GO:0043234	0.0340617	1.28787	65.3408	79	1678	protein complex
55	GO:0019825	0.00167758	Inf	0.0819709	2	2	oxygen binding		55	GO:0006470	4.43e-05	5.02111	2.58203	11	64	protein dephosphorylation		55	GO:0009379	0.0362333	8.27071	0.311518	2	8	Holliday junction helicase complex
56	GO:0004109	0.00167758	Inf	0.0819709	2	2	coproporphyrinogen oxidase activity		56	GO:0006259	4.54e-05	1.735	45.1856	72	1120	DNA metabolic process		56	GO:0048476	0.0362333	8.27071	0.311518	2	8	Holliday junction resolvase complex
57	GO:0005262	0.00167765	4.58454	1.76238	7	43	calcium channel activity		57	GO:0030521	7.25e-05	11.0938	0.766541	6	19	androgen receptor signaling pathway		57	GO:0031461	0.0367688	2.10593	4.51701	9	116	cullin-RING ubiquitin ligase complex
58	GO:0022832	0.00169487	4.01621	2.2542	8	55	voltage-gated channel activity		58	GO:0030522	7.25e-05	11.0938	0.766541	6	19	intracellular receptor signaling pathway		58	GO:0012506	0.0376183	2.58176	2.49214	6	64	vesicle membrane
59	GO:0005244	0.00169487	4.01621	2.2542	8	55	voltage-gated ion channel activity		59	GO:0030518	7.25e-05	11.0938	0.766541	6	19	intracellular steroid hormone receptor signaling pathway		59	GO:0030133	0.0401444	2.53769	2.53108	6	65	transport vesicle
60	GO:0022843	0.00199363	5.23495	1.35252	6	33	voltage-gated cation channel activity		60	GO:0016310	9.01e-05	2.03239	21.2614	40	527	phosphorylation		60	GO:0000151	0.0441548	2.02904	4.67277	9	120	ubiquitin ligase complex
61	GO:0015085	0.00220125	4.34273	1.84435	7	45	calcium ion transmembrane transporter activity		61	GO:0043401	0.000100116	10.3006	0.806885	6	20	steroid hormone mediated signaling pathway		61	GO:0071203	0.04629	4.14184	0.817734	3	21	WASH complex
62	GO:0098772	0.00226209	1.83942	17.1729	30	419	molecular function regulator		62	GO:0048545	0.000100116	10.3006	0.806885	6	20	response to steroid hormone
63	GO:0000166	0.00333916	1.34805	88.4057	113	2157	nucleotide binding		63	GO:0071396	0.000100116	10.3006	0.806885	6	20	cellular response to lipid
64	GO:1901265	0.00333916	1.34805	88.4057	113	2157	nucleoside phosphate binding		64	GO:0071383	0.000100116	10.3006	0.806885	6	20	cellular response to steroid hormone stimulus
65	GO:0003779	0.00453005	3.07793	3.19687	9	78	actin binding		65	GO:0071407	0.000100116	10.3006	0.806885	6	20	cellular response to organic cyclic compound
66	GO:0003677	0.00483831	1.3221	93.9797	118	2293	DNA binding		66	GO:0033993	0.000100116	10.3006	0.806885	6	20	response to lipid
67	GO:0043548	0.00489558	46.925	0.122956	2	3	phosphatidylinositol 3-kinase binding		67	GO:0014070	0.000100116	10.3006	0.806885	6	20	response to organic cyclic compound
68	GO:0003848	0.00489558	46.925	0.122956	2	3	2-amino-4-hydroxy-6-hydroxymethyldihydropteridine diphosphokinase activity		68	GO:0048731	0.000111534	6.42579	1.53308	8	38	system development
69	GO:0030554	0.00498461	1.37864	65.3718	86	1595	adenyl nucleotide binding		69	GO:0051382	0.000176941	5.1686	2.05756	9	51	kinetochore assembly
70	GO:0016773	0.00543738	1.58295	27.0504	41	660	phosphotransferase activity, alcohol group as acceptor		70	GO:0051383	0.000176941	5.1686	2.05756	9	51	kinetochore organization
71	GO:0005524	0.00638097	1.3682	64.2242	84	1567	ATP binding		71	GO:0009755	0.000235159	8.48079	0.927918	6	23	hormone-mediated signaling pathway
72	GO:0032559	0.00658952	1.36618	64.3062	84	1569	adenyl ribonucleotide binding		72	GO:0000184	0.000286136	6.47713	1.33136	7	33	nuclear-transcribed mRNA catabolic process, nonsense-mediated decay
73	GO:0017048	0.00663116	6.2689	0.778724	4	19	Rho GTPase binding		73	GO:0071495	0.000286136	6.47713	1.33136	7	33	cellular response to endogenous stimulus
74	GO:0003777	0.00706046	3.09189	2.828	8	69	microtubule motor activity		74	GO:0044238	0.000332835	1.36912	290.761	329	7207	primary metabolic process
75	GO:0036094	0.00816619	1.29923	92.8321	115	2265	small molecule binding		75	GO:0043170	0.000397304	1.35542	258.889	297	6417	macromolecule metabolic process
76	GO:0043168	0.00829865	1.3051	88.3237	110	2155	anion binding		76	GO:0009719	0.000419999	6.01351	1.41205	7	35	response to endogenous stimulus
77	GO:0003676	0.0085606	1.22305	196.279	225	4789	nucleic acid binding		77	GO:0034508	0.00042215	4.52035	2.29962	9	57	centromere complex assembly
78	GO:0008942	0.00952527	23.4611	0.163942	2	4	nitrite reductase [NAD(P)H] activity		78	GO:0002376	0.000432245	3.11147	4.96235	14	123	immune system process
79	GO:0004590	0.00952527	23.4611	0.163942	2	4	orotidine-5'-phosphate decarboxylase activity		79	GO:0000956	0.000599686	5.61171	1.49274	7	37	nuclear-transcribed mRNA catabolic process
80	GO:0046857	0.00952527	23.4611	0.163942	2	4	oxidoreductase activity, acting on other nitrogenous compounds as donors, with NAD or NADP as acceptor		80	GO:0032870	0.000601087	6.8632	1.0893	6	27	cellular response to hormone stimulus
81	GO:0004112	0.0113561	5.22315	0.90168	4	22	cyclic-nucleotide phosphodiesterase activity		81	GO:0006464	0.000633923	1.64632	37.6815	58	934	cellular protein modification process
82	GO:0004114	0.0113561	5.22315	0.90168	4	22	3',5'-cyclic-nucleotide phosphodiesterase activity		82	GO:0036211	0.000633923	1.64632	37.6815	58	934	protein modification process
83	GO:0097367	0.011394	1.29319	85.6596	106	2090	carbohydrate derivative binding		83	GO:0048856	0.00065112	2.35618	9.60194	21	238	anatomical structure development
84	GO:0015278	0.0133613	3.92004	1.43449	5	35	calcium-release channel activity		84	GO:1901576	0.000726755	1.36991	135.597	168	3361	organic substance biosynthetic process
85	GO:0099604	0.0133613	3.92004	1.43449	5	35	ligand-gated calcium channel activity		85	GO:0009058	0.000834828	1.35998	141.608	174	3510	biosynthetic process
86	GO:0005217	0.0133613	3.92004	1.43449	5	35	intracellular ligand-gated ion channel activity		86	GO:0009725	0.000900732	6.26539	1.16998	6	29	response to hormone
87	GO:0005219	0.0133613	3.92004	1.43449	5	35	ryanodine-sensitive calcium-release channel activity		87	GO:0007264	0.000966137	3.15179	4.1958	12	104	small GTPase mediated signal transduction
88	GO:0004000	0.0144137	7.04478	0.532811	3	13	adenosine deaminase activity		88	GO:0015740	0.00108805	6.00385	1.21033	6	30	C4-dicarboxylate transport
89	GO:0030234	0.0150029	1.74582	12.5416	21	306	enzyme regulator activity		89	GO:0015743	0.00108805	6.00385	1.21033	6	30	malate transport
90	GO:0051998	0.0154458	15.6398	0.204927	2	5	protein carboxyl O-methyltransferase activity		90	GO:0006367	0.00130764	2.38723	8.1092	18	201	transcription initiation from RNA polymerase II promoter
91	GO:0010340	0.0154458	15.6398	0.204927	2	5	carboxyl-O-methyltransferase activity		91	GO:0006914	0.00146269	2.36104	8.18989	18	203	autophagy
92	GO:0098809	0.0154458	15.6398	0.204927	2	5	nitrite reductase activity		92	GO:0044767	0.0014908	2.19152	10.2474	21	254	single-organism developmental process
93	GO:0003880	0.0154458	15.6398	0.204927	2	5	protein C-terminal carboxyl O-methyltransferase activity		93	GO:0006835	0.00155087	5.54113	1.29102	6	32	dicarboxylic acid transport
94	GO:0004671	0.0154458	15.6398	0.204927	2	5	protein C-terminal S-isoprenylcysteine carboxyl O-methyltransferase activity		94	GO:0061061	0.00162469	Inf	0.0806885	2	2	muscle structure development
95	GO:0016661	0.0154458	15.6398	0.204927	2	5	oxidoreductase activity, acting on other nitrogenous compounds as donors		95	GO:0061035	0.00162469	Inf	0.0806885	2	2	regulation of cartilage development
96	GO:0016301	0.0195894	1.40027	36.2312	49	884	kinase activity		96	GO:0046599	0.00162469	Inf	0.0806885	2	2	regulation of centriole replication
97	GO:0004809	0.022544	11.7292	0.245913	2	6	tRNA (guanine-N2-)-methyltransferase activity		97	GO:0017144	0.00162469	Inf	0.0806885	2	2	drug metabolic process
98	GO:0046923	0.022544	11.7292	0.245913	2	6	ER retention sequence binding		98	GO:0006826	0.00162469	Inf	0.0806885	2	2	iron ion transport
99	GO:0047429	0.022544	11.7292	0.245913	2	6	nucleoside-triphosphate diphosphatase activity		99	GO:0050953	0.00162469	Inf	0.0806885	2	2	sensory perception of light stimulus
100	GO:0016423	0.022544	11.7292	0.245913	2	6	tRNA (guanine) methyltransferase activity		100	GO:0002062	0.00162469	Inf	0.0806885	2	2	chondrocyte differentiation
101	GO:0046872	0.022982	1.20663	142.343	164	3473	metal ion binding		101	GO:0002063	0.00162469	Inf	0.0806885	2	2	chondrocyte development
102	GO:0051082	0.0241971	2.07549	5.57402	11	136	unfolded protein binding		102	GO:0098534	0.00162469	Inf	0.0806885	2	2	centriole assembly
103	GO:0043169	0.0247373	1.20257	143.613	165	3504	cation binding		103	GO:0046600	0.00162469	Inf	0.0806885	2	2	negative regulation of centriole replication
104	GO:0008289	0.0249411	1.92986	7.0495	13	172	lipid binding		104	GO:0032330	0.00162469	Inf	0.0806885	2	2	regulation of chondrocyte differentiation
105	GO:0046983	0.0252444	1.69597	11.6399	19	284	protein dimerization activity		105	GO:0016999	0.00162469	Inf	0.0806885	2	2	antibiotic metabolic process
106	GO:0022836	0.0252444	1.69597	11.6399	19	284	gated channel activity		106	GO:0061448	0.00162469	Inf	0.0806885	2	2	connective tissue development
107	GO:0008276	0.0262101	3.91597	1.14759	4	28	protein methyltransferase activity		107	GO:0061181	0.00162469	Inf	0.0806885	2	2	regulation of chondrocyte development
108	GO:0003743	0.0297036	2.49621	2.99194	7	73	translation initiation factor activity		108	GO:0051216	0.00162469	Inf	0.0806885	2	2	cartilage development
109	GO:0005261	0.0305631	1.87046	7.25443	13	177	cation channel activity		109	GO:0060284	0.00162469	Inf	0.0806885	2	2	regulation of cell development
110	GO:0016831	0.0308865	2.71412	2.37716	6	58	carboxy-lyase activity		110	GO:0001501	0.00162469	Inf	0.0806885	2	2	skeletal system development
111	GO:0008270	0.0323721	1.23036	90.168	107	2200	zinc ion binding		111	GO:0009435	0.00162469	Inf	0.0806885	2	2	NAD biosynthetic process
112	GO:0004003	0.0353461	4.69513	0.737738	3	18	ATP-dependent DNA helicase activity		112	GO:0015684	0.00162469	Inf	0.0806885	2	2	ferrous iron transport
113	GO:0005249	0.0366018	3.48024	1.27055	4	31	voltage-gated potassium channel activity		113	GO:0017000	0.00162469	Inf	0.0806885	2	2	antibiotic biosynthetic process
114	GO:0005085	0.0369039	2.21572	3.81165	8	93	guanyl-nucleotide exchange factor activity		114	GO:0007517	0.00162469	Inf	0.0806885	2	2	muscle organ development
115	GO:0048487	0.0398549	7.81852	0.327884	2	8	beta-tubulin binding		115	GO:0043385	0.00162469	Inf	0.0806885	2	2	mycotoxin metabolic process
116	GO:0031420	0.0407301	4.40143	0.778724	3	19	alkali metal ion binding		116	GO:0043386	0.00162469	Inf	0.0806885	2	2	mycotoxin biosynthetic process
117	GO:0030955	0.0407301	4.40143	0.778724	3	19	potassium ion binding		117	GO:0061572	0.00162469	Inf	0.0806885	2	2	actin filament bundle organization
118	GO:0008964	0.0409855	Inf	0.0409855	1	1	phosphoenolpyruvate carboxylase activity		118	GO:0007601	0.00162469	Inf	0.0806885	2	2	visual perception
119	GO:0072586	0.0409855	Inf	0.0409855	1	1	DNA topoisomerase (ATP-hydrolyzing) regulator activity		119	GO:0007099	0.00162469	Inf	0.0806885	2	2	centriole replication
120	GO:0008657	0.0409855	Inf	0.0409855	1	1	DNA topoisomerase (ATP-hydrolyzing) inhibitor activity		120	GO:1902116	0.00162469	Inf	0.0806885	2	2	negative regulation of organelle assembly
121	GO:0099094	0.0424086	2.79803	1.92632	5	47	ligand-gated cation channel activity		121	GO:0019674	0.00162469	Inf	0.0806885	2	2	NAD metabolic process
122	GO:0008081	0.0424086	2.79803	1.92632	5	47	phosphoric diester hydrolase activity		122	GO:0007275	0.00178882	2.64555	5.72889	14	142	multicellular organism development
123	GO:0046915	0.0493669	2.67053	2.00829	5	49	transition metal ion transmembrane transporter activity		123	GO:0098542	0.00180944	3.3023	3.34857	10	83	defense response to other organism
124	GO:0003857	0.0493669	2.67053	2.00829	5	49	3-hydroxyacyl-CoA dehydrogenase activity		124	GO:0043412	0.00226155	1.50249	47.4045	67	1175	macromolecule modification
125	GO:0031543	0.0498749	6.70119	0.368869	2	9	peptidyl-proline dioxygenase activity		125	GO:0071310	0.00227998	4.31358	1.85584	7	46	cellular response to organic substance
126	GO:0031545	0.0498749	6.70119	0.368869	2	9	peptidyl-proline 4-dioxygenase activity		126	GO:0009966	0.00277768	2.41922	6.6568	15	165	regulation of signal transduction
127	GO:0000975	0.0498749	6.70119	0.368869	2	9	regulatory region DNA binding		127	GO:0070887	0.00329805	4.0045	1.97687	7	49	cellular response to chemical stimulus
128	GO:0019798	0.0498749	6.70119	0.368869	2	9	procollagen-proline dioxygenase activity		128	GO:0032502	0.0034036	2.03137	10.9736	21	272	developmental process
129	GO:0004656	0.0498749	6.70119	0.368869	2	9	procollagen-proline 4-dioxygenase activity		129	GO:0045185	0.00409824	7.36749	0.685853	4	17	maintenance of protein location
130	GO:0001067	0.0498749	6.70119	0.368869	2	9	regulatory region nucleic acid binding		130	GO:0051651	0.00409824	7.36749	0.685853	4	17	maintenance of location in cell
131	GO:0044212	0.0498749	6.70119	0.368869	2	9	transcription regulatory region DNA binding		131	GO:0032507	0.00409824	7.36749	0.685853	4	17	maintenance of protein location in cell
									132	GO:0070925	0.004178	2.73378	4.35718	11	108	organelle assembly
									133	GO:0006952	0.00432558	2.47129	5.6482	13	140	defense response
									134	GO:0071704	0.00439533	1.27871	309.763	339	7678	organic substance metabolic process
									135	GO:0001101	0.00457122	11.9559	0.363098	3	9	response to acid chemical
									136	GO:0010167	0.00474344	47.7514	0.121033	2	3	response to nitrate
									137	GO:0048015	0.00474344	47.7514	0.121033	2	3	phosphatidylinositol-mediated signaling
									138	GO:0048017	0.00474344	47.7514	0.121033	2	3	inositol lipid-mediated signaling
									139	GO:0015706	0.00474344	47.7514	0.121033	2	3	nitrate transport
									140	GO:0043065	0.00474344	47.7514	0.121033	2	3	positive regulation of apoptotic process
									141	GO:0043068	0.00474344	47.7514	0.121033	2	3	positive regulation of programmed cell death
									142	GO:0042173	0.00474344	47.7514	0.121033	2	3	regulation of sporulation resulting in formation of a cellular spore
									143	GO:0045881	0.00474344	47.7514	0.121033	2	3	positive regulation of sporulation resulting in formation of a cellular spore
									144	GO:0045597	0.00474344	47.7514	0.121033	2	3	positive regulation of cell differentiation
									145	GO:0043938	0.00474344	47.7514	0.121033	2	3	positive regulation of sporulation
									146	GO:0010942	0.00474344	47.7514	0.121033	2	3	positive regulation of cell death
									147	GO:0014065	0.00474344	47.7514	0.121033	2	3	phosphatidylinositol 3-kinase signaling
									148	GO:0014066	0.00474344	47.7514	0.121033	2	3	regulation of phosphatidylinositol 3-kinase signaling
									149	GO:0014068	0.00474344	47.7514	0.121033	2	3	positive regulation of phosphatidylinositol 3-kinase signaling
									150	GO:0048583	0.00561081	2.16158	7.86713	16	195	regulation of response to stimulus
									151	GO:0023051	0.00595052	2.21019	7.22162	15	179	regulation of signaling
									152	GO:0010646	0.00595052	2.21019	7.22162	15	179	regulation of cell communication
									153	GO:0033151	0.00633621	10.2471	0.403443	3	10	V(D)J recombination
									154	GO:0002562	0.00633621	10.2471	0.403443	3	10	somatic diversification of immune receptors via germline recombination within a single locus
									155	GO:0002520	0.00633621	10.2471	0.403443	3	10	immune system development
									156	GO:0016444	0.00633621	10.2471	0.403443	3	10	somatic cell DNA recombination
									157	GO:0002200	0.00633621	10.2471	0.403443	3	10	somatic diversification of immune receptors
									158	GO:0002252	0.00639075	3.99872	1.69446	6	42	immune effector process
									159	GO:0051607	0.00639075	3.99872	1.69446	6	42	defense response to virus
									160	GO:1902531	0.00654633	2.70514	3.99408	10	99	regulation of intracellular signal transduction
									161	GO:0034655	0.00715089	2.84853	3.42926	9	85	nucleobase-containing compound catabolic process
									162	GO:0051235	0.00758092	5.98464	0.806885	4	20	maintenance of location
									163	GO:0006402	0.0077031	3.36162	2.29962	7	57	mRNA catabolic process
									164	GO:0007018	0.00825207	3.00387	2.90479	8	72	microtubule-based movement
									165	GO:0030154	0.00846435	3.29544	2.33997	7	58	cell differentiation
									166	GO:0010033	0.00846435	3.29544	2.33997	7	58	response to organic substance
									167	GO:0009401	0.00856687	4.43768	1.29102	5	32	phosphoenolpyruvate-dependent sugar phosphotransferase system
									168	GO:0009653	0.0085993	2.58795	4.15546	10	103	anatomical structure morphogenesis
									169	GO:0006207	0.00923351	23.8738	0.161377	2	4	de novo' pyrimidine nucleobase biosynthetic process
									170	GO:0009143	0.00923351	23.8738	0.161377	2	4	nucleoside triphosphate catabolic process
									171	GO:1902115	0.00923351	23.8738	0.161377	2	4	regulation of organelle assembly
									172	GO:0042221	0.009489	2.22339	6.21302	13	154	response to chemical
									173	GO:0006401	0.0101506	3.17058	2.42066	7	60	RNA catabolic process
									174	GO:0048869	0.0104386	2.50647	4.27649	10	106	cellular developmental process
									175	GO:0048878	0.0110799	3.11161	2.461	7	61	chemical homeostasis
									176	GO:0044550	0.0137997	7.17126	0.524476	3	13	secondary metabolite biosynthetic process
									177	GO:0006206	0.0149796	15.9146	0.201721	2	5	pyrimidine nucleobase metabolic process
									178	GO:0030435	0.0149796	15.9146	0.201721	2	5	sporulation resulting in formation of a cellular spore
									179	GO:0071900	0.0149796	15.9146	0.201721	2	5	regulation of protein serine/threonine kinase activity
									180	GO:1904029	0.0149796	15.9146	0.201721	2	5	regulation of cyclin-dependent protein kinase activity
									181	GO:0043687	0.0149796	15.9146	0.201721	2	5	post-translational protein modification
									182	GO:0018410	0.0149796	15.9146	0.201721	2	5	C-terminal protein amino acid modification
									183	GO:0043937	0.0149796	15.9146	0.201721	2	5	regulation of sporulation
									184	GO:0019856	0.0149796	15.9146	0.201721	2	5	pyrimidine nucleobase biosynthetic process
									185	GO:0006481	0.0149796	15.9146	0.201721	2	5	C-terminal protein methylation
									186	GO:0000079	0.0149796	15.9146	0.201721	2	5	regulation of cyclin-dependent protein serine/threonine kinase activity
									187	GO:0048522	0.014997	2.35789	4.51856	10	112	positive regulation of cellular process
									188	GO:0009615	0.0162005	3.19666	2.05756	6	51	response to virus
									189	GO:0051056	0.0162223	2.63162	3.26789	8	81	regulation of small GTPase mediated signal transduction
									190	GO:0043207	0.0168047	2.31217	4.59925	10	114	response to external biotic stimulus
									191	GO:0051707	0.0168047	2.31217	4.59925	10	114	response to other organism
									192	GO:0010035	0.0168897	4.5579	1.00861	4	25	response to inorganic substance
									193	GO:1901700	0.0168897	4.5579	1.00861	4	25	response to oxygen-containing compound
									194	GO:0046942	0.0193124	3.06014	2.13825	6	53	carboxylic acid transport
									195	GO:0015849	0.0193124	3.06014	2.13825	6	53	organic acid transport
									196	GO:0035556	0.0196338	1.60356	16.9042	26	419	intracellular signal transduction
									197	GO:0019748	0.0206807	5.9751	0.605164	3	15	secondary metabolic process
									198	GO:0006303	0.0206807	5.9751	0.605164	3	15	double-strand break repair via nonhomologous end joining
									199	GO:0048598	0.0218734	11.935	0.242066	2	6	embryonic morphogenesis
									200	GO:0055088	0.0218734	11.935	0.242066	2	6	lipid homeostasis
									201	GO:0035437	0.0218734	11.935	0.242066	2	6	maintenance of protein localization in endoplasmic reticulum
									202	GO:0072595	0.0218734	11.935	0.242066	2	6	maintenance of protein localization in organelle
									203	GO:0046605	0.0218734	11.935	0.242066	2	6	regulation of centrosome cycle
									204	GO:0046606	0.0218734	11.935	0.242066	2	6	negative regulation of centrosome cycle
									205	GO:0010824	0.0218734	11.935	0.242066	2	6	regulation of centrosome duplication
									206	GO:0010826	0.0218734	11.935	0.242066	2	6	negative regulation of centrosome duplication
									207	GO:0006621	0.0218734	11.935	0.242066	2	6	protein retention in ER lumen
									208	GO:0051298	0.0218734	11.935	0.242066	2	6	centrosome duplication
									209	GO:0051220	0.0218734	11.935	0.242066	2	6	cytoplasmic sequestering of protein
									210	GO:0042127	0.0218734	11.935	0.242066	2	6	regulation of cell proliferation
									211	GO:0008283	0.0218734	11.935	0.242066	2	6	cell proliferation
									212	GO:0008284	0.0218734	11.935	0.242066	2	6	positive regulation of cell proliferation
									213	GO:0046700	0.0219114	2.32464	4.11512	9	102	heterocycle catabolic process
									214	GO:0044270	0.023186	2.29973	4.15546	9	103	cellular nitrogen compound catabolic process
									215	GO:0006874	0.023736	3.32585	1.65412	5	41	cellular calcium ion homeostasis
									216	GO:0055074	0.023736	3.32585	1.65412	5	41	calcium ion homeostasis
									217	GO:0072503	0.023736	3.32585	1.65412	5	41	cellular divalent inorganic cation homeostasis
									218	GO:0072507	0.023736	3.32585	1.65412	5	41	divalent inorganic cation homeostasis
									219	GO:0009607	0.0256704	2.14563	4.922	10	122	response to biotic stimulus
									220	GO:0044248	0.0259741	1.50962	20.6563	30	512	cellular catabolic process
									221	GO:0007010	0.0260678	1.91987	7.10059	13	176	cytoskeleton organization
									222	GO:0048468	0.0260799	3.23571	1.69446	5	42	cell development
									223	GO:0050793	0.027957	3.82741	1.16998	4	29	regulation of developmental process
									224	GO:0000726	0.0291224	5.12069	0.685853	3	17	non-recombinational repair
									225	GO:0051338	0.0298133	9.54723	0.28241	2	7	regulation of transferase activity
									226	GO:0043549	0.0298133	9.54723	0.28241	2	7	regulation of kinase activity
									227	GO:0009396	0.0298133	9.54723	0.28241	2	7	folic acid-containing compound biosynthetic process
									228	GO:0042126	0.0298133	9.54723	0.28241	2	7	nitrate metabolic process
									229	GO:0042128	0.0298133	9.54723	0.28241	2	7	nitrate assimilation
									230	GO:0045859	0.0298133	9.54723	0.28241	2	7	regulation of protein kinase activity
									231	GO:0009403	0.0298133	9.54723	0.28241	2	7	toxin biosynthetic process
									232	GO:0009112	0.0298133	9.54723	0.28241	2	7	nucleobase metabolic process
									233	GO:0046112	0.0298133	9.54723	0.28241	2	7	nucleobase biosynthetic process
									234	GO:1901361	0.0319618	2.1607	4.39753	9	109	organic cyclic compound catabolic process
									235	GO:0008643	0.0339777	2.99231	1.81549	5	45	carbohydrate transport
									236	GO:0048646	0.0347864	3.54333	1.25067	4	31	anatomical structure formation involved in morphogenesis
									237	GO:0015711	0.0357704	2.61335	2.461	6	61	organic anion transport
									238	GO:0048518	0.037476	2.00129	5.24476	10	130	positive regulation of biological process
									239	GO:0010948	0.0385321	3.41651	1.29102	4	32	negative regulation of cell cycle process
									240	GO:0043711	0.0387041	7.95539	0.322754	2	8	pilus organization
									241	GO:0019363	0.0387041	7.95539	0.322754	2	8	pyridine nucleotide biosynthetic process
									242	GO:0019359	0.0387041	7.95539	0.322754	2	8	nicotinamide nucleotide biosynthetic process
									243	GO:0072525	0.0387041	7.95539	0.322754	2	8	pyridine-containing compound biosynthetic process
									244	GO:0051297	0.0387041	7.95539	0.322754	2	8	centrosome organization
									245	GO:0006013	0.0387041	7.95539	0.322754	2	8	mannose metabolic process
									246	GO:0009297	0.0387041	7.95539	0.322754	2	8	pilus assembly
									247	GO:0007098	0.0387041	7.95539	0.322754	2	8	centrosome cycle
									248	GO:0007021	0.0387041	7.95539	0.322754	2	8	tubulin complex assembly
									249	GO:0007023	0.0387041	7.95539	0.322754	2	8	post-chaperonin tubulin folding pathway
									250	GO:0019439	0.0389545	2.07692	4.5589	9	113	aromatic compound catabolic process
									251	GO:0044707	0.0391208	1.65846	10.6509	17	264	single-multicellular organism process
									252	GO:0072511	0.0399837	2.84936	1.89618	5	47	divalent inorganic cation transport
									253	GO:0015977	0.0403443	Inf	0.0403443	1	1	carbon fixation
									254	GO:0000128	0.0403443	Inf	0.0403443	1	1	flocculation
									255	GO:0007586	0.0403443	Inf	0.0403443	1	1	digestion
									256	GO:0009617	0.0424993	3.29843	1.33136	4	33	response to bacterium
									257	GO:0042742	0.0424993	3.29843	1.33136	4	33	defense response to bacterium
									258	GO:0006820	0.0446008	1.93611	5.40613	10	134	anion transport
									259	GO:0044699	0.0463273	1.16946	200.108	219	4960	single-organism process
									260	GO:0051094	0.0484564	6.81836	0.363098	2	9	positive regulation of developmental process
									261	GO:2001057	0.0484564	6.81836	0.363098	2	9	reactive nitrogen species metabolic process
									262	GO:0006760	0.0484564	6.81836	0.363098	2	9	folic acid-containing compound metabolic process
									263	GO:0009404	0.0484564	6.81836	0.363098	2	9	toxin metabolic process
									264	GO:1901698	0.0484564	6.81836	0.363098	2	9	response to nitrogen compound
									265	GO:0042559	0.0484564	6.81836	0.363098	2	9	pteridine-containing compound biosynthetic process
Cluster 8 Molecular function (MF)									Cluster 8 Biological process (BP)									Cluster 8 Cellular component (CC)
	GOMFID	Pvalue	OddsRatio	ExpCount	Count	Size	Term			GOBPID	Pvalue	OddsRatio	ExpCount	Count	Size	Term			GOCCID	Pvalue	OddsRatio	ExpCount	Count	Size	Term
1	GO:0003735	3.06e-96	16.9805	15.7825	139	337	structural constituent of ribosome		1	GO:0006412	1.06e-83	10.0936	28.4196	164	508	translation		1	GO:0005840	1.01e-86	15.3062	19.7783	139	330	ribosome
2	GO:0005198	3.48e-38	4.0641	48.5184	152	1036	structural molecule activity		2	GO:0043604	1.31e-82	9.61297	29.986	167	536	amide biosynthetic process		2	GO:0030529	7.5e-68	8.97826	29.4877	147	492	intracellular ribonucleoprotein complex
3	GO:0036094	7.15e-09	1.72064	106.075	163	2265	small molecule binding		3	GO:0043043	2.24e-82	9.82886	28.9231	164	517	peptide biosynthetic process		3	GO:1990904	1.88e-67	8.89738	29.6675	147	495	ribonucleoprotein complex
4	GO:0043168	1.11e-08	1.72549	100.924	156	2155	anion binding		4	GO:0006518	1.74e-81	9.4854	30.042	166	537	peptide metabolic process		4	GO:0044444	1.12e-34	3.56795	78.0944	187	1303	cytoplasmic part
5	GO:0000166	2.05e-08	1.70896	101.018	155	2157	nucleotide binding		5	GO:0043603	1.12e-80	9.10038	31.5524	169	564	cellular amide metabolic process		5	GO:0005737	8.63e-30	3.07349	98.8916	206	1650	cytoplasm
6	GO:1901265	2.05e-08	1.70896	101.018	155	2157	nucleoside phosphate binding		6	GO:1901566	5.46e-66	6.16282	46.6573	186	834	organonitrogen compound biosynthetic process		6	GO:0043232	2.43e-28	3.22537	74.4984	170	1243	intracellular non-membrane-bounded organelle
7	GO:0001883	2.06e-08	2.5474	22.6669	52	484	purine nucleoside binding		7	GO:1901564	2.19e-60	4.64706	75.4126	231	1348	organonitrogen compound metabolic process		7	GO:0043228	1.3e-27	3.15834	76.2365	171	1272	non-membrane-bounded organelle
8	GO:0005525	2.06e-08	2.5474	22.6669	52	484	GTP binding		8	GO:0044267	2.36e-31	3.00411	88.6713	201	1585	cellular protein metabolic process		8	GO:0009295	7.3e-08	20.51	0.958949	9	16	nucleoid
9	GO:0032550	2.06e-08	2.5474	22.6669	52	484	purine ribonucleoside binding		9	GO:0044271	3.52e-14	1.91855	144	227	2574	cellular nitrogen compound biosynthetic process		9	GO:0032991	5.87e-07	1.59378	154.451	205	2577	macromolecular complex
10	GO:0032549	2.06e-08	2.5474	22.6669	52	484	ribonucleoside binding		10	GO:0010467	5.58e-14	1.85275	173.874	261	3108	gene expression		10	GO:0005777	7.53e-05	6.22969	1.9179	9	32	peroxisome
11	GO:0032561	2.37e-08	2.53535	22.7606	52	486	guanyl ribonucleotide binding		11	GO:0019538	2.02e-12	1.78458	172.923	254	3091	protein metabolic process		11	GO:0042579	7.53e-05	6.22969	1.9179	9	32	microbody
12	GO:0019001	2.71e-08	2.52341	22.8542	52	488	guanyl nucleotide binding		12	GO:0009058	7.47e-12	1.73043	196.364	278	3510	biosynthetic process		12	GO:0031231	0.00065239	9.89007	0.779146	5	13	intrinsic component of peroxisomal membrane
13	GO:0001882	4.94e-08	2.47101	23.2757	52	497	nucleoside binding		13	GO:1901576	3.38e-11	1.7096	188.028	266	3361	organic substance biosynthetic process		13	GO:0005779	0.00065239	9.89007	0.779146	5	13	integral component of peroxisomal membrane
14	GO:0017150	5.23e-08	27.3929	0.655654	8	14	tRNA dihydrouridine synthase activity		14	GO:0044249	2.03e-10	1.68321	179.357	253	3206	cellular biosynthetic process		14	GO:0005778	0.0009652	8.79007	0.83908	5	14	peroxisomal membrane
15	GO:0097367	1.97e-07	1.65685	97.8798	147	2090	carbohydrate derivative binding		15	GO:0006807	2.15e-10	1.62561	257.902	338	4610	nitrogen compound metabolic process		15	GO:0044438	0.0009652	8.79007	0.83908	5	14	microbody part
16	GO:0015291	2.83e-07	5.25174	3.93392	17	84	secondary active transmembrane transporter activity		16	GO:0034645	2.7e-10	1.7137	153.287	223	2740	cellular macromolecule biosynthetic process		16	GO:0044439	0.0009652	8.79007	0.83908	5	14	peroxisomal part
17	GO:0015294	4.32e-07	7.05824	2.38845	13	51	solute:cation symporter activity		17	GO:0009059	5.23e-10	1.69756	154.35	223	2759	macromolecule biosynthetic process		17	GO:0031903	0.0009652	8.79007	0.83908	5	14	microbody membrane
18	GO:0032553	1.55e-06	1.64196	83.6895	126	1787	ribonucleotide binding		18	GO:0000902	3.16e-09	7.21769	3.41259	18	61	cell morphogenesis		18	GO:0009536	0.00358551	Inf	0.119869	2	2	plastid
19	GO:0003723	2.73e-06	2.0019	33.0169	61	705	RNA binding		19	GO:0032989	3.16e-09	7.21769	3.41259	18	61	cellular component morphogenesis		19	GO:0009507	0.00358551	Inf	0.119869	2	2	chloroplast
20	GO:0005351	3.91e-06	24.5949	0.515157	6	11	sugar:proton symporter activity		20	GO:0006613	9.73e-08	4.64851	5.53846	21	99	cotranslational protein targeting to membrane		20	GO:0009512	0.0103283	31.4892	0.179803	2	3	cytochrome b6f complex
21	GO:0015295	3.91e-06	24.5949	0.515157	6	11	solute:proton symporter activity		21	GO:0006614	9.73e-08	4.64851	5.53846	21	99	SRP-dependent cotranslational protein targeting to membrane		21	GO:0031300	0.0194923	2.41758	4.07553	9	68	intrinsic component of organelle membrane
22	GO:0005402	3.91e-06	24.5949	0.515157	6	11	cation:sugar symporter activity		22	GO:0034641	1.57e-07	1.50074	234.685	299	4195	cellular nitrogen compound metabolic process		22	GO:0031301	0.0194923	2.41758	4.07553	9	68	integral component of organelle membrane
23	GO:0051119	3.91e-06	24.5949	0.515157	6	11	sugar transmembrane transporter activity		23	GO:0072599	1.99e-07	4.42031	5.76224	21	103	establishment of protein localization to endoplasmic reticulum		23	GO:0020002	0.0198385	15.7426	0.239737	2	4	host cell plasma membrane
24	GO:0015293	5.65e-06	5.36042	2.95044	13	63	symporter activity		24	GO:0045047	1.99e-07	4.42031	5.76224	21	103	protein targeting to ER		24	GO:0044156	0.0198385	15.7426	0.239737	2	4	host cell junction
25	GO:0003746	6.2e-06	14.3603	0.796151	7	17	translation elongation factor activity		25	GO:0006612	3.91e-07	4.21333	5.98601	21	107	protein targeting to membrane		25	GO:0098799	0.0204322	3.5901	1.61823	5	27	outer mitochondrial membrane protein complex
26	GO:0035639	6.71e-06	1.59678	82.7997	122	1768	purine ribonucleoside triphosphate binding		26	GO:0070972	5.41e-07	4.1169	6.0979	21	109	protein localization to endoplasmic reticulum		26	GO:0032580	0.0457748	7.86935	0.359606	2	6	Golgi cisterna membrane
27	GO:0032555	7.08e-06	1.59463	82.8934	122	1770	purine ribonucleotide binding		27	GO:0006399	6.43e-07	2.40601	21.3147	46	381	tRNA metabolic process		27	GO:0031985	0.0457748	7.86935	0.359606	2	6	Golgi cisterna
28	GO:0022804	8.24e-06	2.95011	9.41332	25	201	active transmembrane transporter activity		28	GO:0090150	1.17e-06	3.89396	6.37762	21	114	establishment of protein localization to membrane		28	GO:0005742	0.0475056	4.29707	0.83908	3	14	mitochondrial outer membrane translocase complex
29	GO:0003924	9.04e-06	2.15398	22.6201	45	483	GTPase activity		29	GO:0072657	1.17e-06	3.89396	6.37762	21	114	protein localization to membrane
30	GO:0017076	1.41e-05	1.56716	84.111	122	1796	purine nucleotide binding		30	GO:0050909	2.8e-06	3.20057	8.95105	25	160	sensory perception of taste
31	GO:0004826	2.3e-05	81.8027	0.234162	4	5	phenylalanine-tRNA ligase activity		31	GO:0030261	3.12e-06	10.2392	1.34266	9	24	chromosome condensation
32	GO:0000049	3.01e-05	8.21102	1.31131	8	28	tRNA binding		32	GO:0009653	3.68e-06	3.89245	5.76224	19	103	anatomical structure morphogenesis
33	GO:0005524	4.13e-05	1.56487	73.3864	107	1567	ATP binding		33	GO:0034660	4.41e-06	2.14135	25.6783	50	459	ncRNA metabolic process
34	GO:0032559	4.35e-05	1.56252	73.4801	107	1569	adenyl ribonucleotide binding		34	GO:0048869	5.72e-06	3.75731	5.93007	19	106	cellular developmental process
35	GO:0030554	8.42e-05	1.53261	74.6977	107	1595	adenyl nucleotide binding		35	GO:0006520	1.54e-05	2.57092	12.979	30	232	cellular amino acid metabolic process
36	GO:0043022	8.63e-05	6.84088	1.49864	8	32	ribosome binding		36	GO:0008033	2.6e-05	2.37292	15.3287	33	274	tRNA processing
37	GO:0015098	0.00010236	Inf	0.140497	3	3	molybdate ion transmembrane transporter activity		37	GO:0007031	3.08e-05	10.8332	1.00699	7	18	peroxisome organization
38	GO:0016872	0.00010236	Inf	0.140497	3	3	intramolecular lyase activity		38	GO:0006414	6.8e-05	9.16505	1.11888	7	20	translational elongation
39	GO:0048037	0.00014584	1.87749	26.1325	46	558	cofactor binding		39	GO:0003008	9.26e-05	2.20471	16.3357	33	292	system process
40	GO:0004812	0.00016775	3.2894	5.10473	15	109	aminoacyl-tRNA ligase activity		40	GO:0034470	0.00016178	2.03473	19.6923	37	352	ncRNA processing
41	GO:0016875	0.00016775	3.2894	5.10473	15	109	ligase activity, forming carbon-oxygen bonds		41	GO:0006605	0.00017109	2.37037	12.028	26	215	protein targeting
42	GO:0016876	0.00016775	3.2894	5.10473	15	109	ligase activity, forming aminoacyl-tRNA and related compounds		42	GO:0016559	0.00017441	Inf	0.167832	3	3	peroxisome fission
43	GO:0019843	0.00020909	12.7919	0.608822	5	13	rRNA binding		43	GO:0015689	0.00017441	Inf	0.167832	3	3	molybdate ion transport
44	GO:0016874	0.00020935	2.41228	10.7715	24	230	ligase activity		44	GO:0072594	0.00018393	2.4051	11.4126	25	204	establishment of protein localization to organelle
45	GO:0050660	0.00021248	2.74438	7.58685	19	162	flavin adenine dinucleotide binding		45	GO:0007606	0.00031594	2.09824	16	31	286	sensory perception of chemical stimulus
46	GO:0005319	0.0003127	5.47075	1.77963	8	38	lipid transporter activity		46	GO:0050877	0.00035688	2.08156	16.1119	31	288	neurological system process
47	GO:0015144	0.00040524	7.68086	1.03031	6	22	carbohydrate transmembrane transporter activity		47	GO:0007600	0.00035688	2.08156	16.1119	31	288	sensory perception
48	GO:1901476	0.00040524	7.68086	1.03031	6	22	carbohydrate transporter activity		48	GO:0044767	0.00046234	2.13434	14.2098	28	254	single-organism developmental process
49	GO:0017111	0.00048238	1.59167	45.1933	68	965	nucleoside-triphosphatase activity		49	GO:0044237	0.00057574	1.28558	321.063	364	5739	cellular metabolic process
50	GO:0044877	0.00071964	2.2843	10.35	22	221	macromolecular complex binding		50	GO:0009072	0.00078944	6.79778	1.17483	6	21	aromatic amino acid family metabolic process
51	GO:0016462	0.00075013	1.56221	45.9426	68	981	pyrophosphatase activity		51	GO:0044260	0.00081622	1.28165	266.406	307	4762	cellular macromolecule metabolic process
52	GO:0031683	0.00079787	3.24626	4.12125	12	88	G-protein beta/gamma-subunit complex binding		52	GO:0048856	0.00083291	2.10919	13.3147	26	238	anatomical structure development
53	GO:0120013	0.00079939	13.6297	0.468324	4	10	intermembrane lipid transfer activity		53	GO:0033365	0.00092556	2.1272	12.6993	25	227	protein localization to organelle
54	GO:0005215	0.00102043	1.43594	72.0751	98	1539	transporter activity		54	GO:0019751	0.00103465	6.3724	1.23077	6	22	polyol metabolic process
55	GO:0016818	0.00114405	1.53375	46.6919	68	997	hydrolase activity, acting on acid anhydrides, in phosphorus-containing anhydrides		55	GO:0043436	0.00126432	1.79943	21.9301	37	392	oxoacid metabolic process
56	GO:0043021	0.00119881	4.31695	2.15429	8	46	ribonucleoprotein complex binding		56	GO:0032502	0.00134702	1.97393	15.2168	28	272	developmental process
57	GO:0019239	0.0013161	5.85034	1.26448	6	27	deaminase activity		57	GO:0006082	0.00144861	1.78391	22.0979	37	395	organic acid metabolic process
58	GO:0016887	0.00155941	1.73824	23.6504	39	505	ATPase activity		58	GO:0006777	0.00155507	11.3066	0.559441	4	10	Mo-molybdopterin cofactor biosynthetic process
59	GO:0016817	0.00163033	1.5051	48.1906	69	1029	hydrolase activity, acting on acid anhydrides		59	GO:0120009	0.00155507	11.3066	0.559441	4	10	intermembrane lipid transfer
60	GO:0008135	0.00172653	2.93569	4.49591	12	96	translation factor activity, RNA binding		60	GO:0019720	0.00155507	11.3066	0.559441	4	10	Mo-molybdopterin cofactor metabolic process
61	GO:0004004	0.00219074	Inf	0.0936648	2	2	ATP-dependent RNA helicase activity		61	GO:0043937	0.00160155	25.4131	0.27972	3	5	regulation of sporulation
62	GO:0008915	0.00219074	Inf	0.0936648	2	2	lipid-A-disaccharide synthase activity		62	GO:0044281	0.00188364	1.53604	42.7413	62	764	small molecule metabolic process
63	GO:0004555	0.00219074	Inf	0.0936648	2	2	alpha,alpha-trehalase activity		63	GO:0006066	0.00237893	4.40777	1.9021	7	34	alcohol metabolic process
64	GO:0016855	0.00219074	Inf	0.0936648	2	2	racemase and epimerase activity, acting on amino acids and derivatives		64	GO:1901615	0.00237893	4.40777	1.9021	7	34	organic hydroxy compound metabolic process
65	GO:0004512	0.00219074	Inf	0.0936648	2	2	inositol-3-phosphate synthase activity		65	GO:1901605	0.00288042	2.92955	4.1958	11	75	alpha-amino acid metabolic process
66	GO:0051499	0.00219074	Inf	0.0936648	2	2	D-aminoacyl-tRNA deacylase activity		66	GO:0032606	0.00312568	Inf	0.111888	2	2	type I interferon production
67	GO:0043546	0.00219074	Inf	0.0936648	2	2	molybdopterin cofactor binding		67	GO:0006216	0.00312568	Inf	0.111888	2	2	cytidine catabolic process
68	GO:0015927	0.00219074	Inf	0.0936648	2	2	trehalase activity		68	GO:0043243	0.00312568	Inf	0.111888	2	2	positive regulation of protein complex disassembly
69	GO:0004478	0.00219074	Inf	0.0936648	2	2	methionine adenosyltransferase activity		69	GO:0045901	0.00312568	Inf	0.111888	2	2	positive regulation of translational elongation
70	GO:0004640	0.00219074	Inf	0.0936648	2	2	phosphoribosylanthranilate isomerase activity		70	GO:0045905	0.00312568	Inf	0.111888	2	2	positive regulation of translational termination
71	GO:0036361	0.00219074	Inf	0.0936648	2	2	racemase activity, acting on amino acids and derivatives		71	GO:0046500	0.00312568	Inf	0.111888	2	2	S-adenosylmethionine metabolic process
72	GO:0004408	0.00219074	Inf	0.0936648	2	2	holocytochrome-c synthase activity		72	GO:0006556	0.00312568	Inf	0.111888	2	2	S-adenosylmethionine biosynthetic process
73	GO:0008186	0.00219074	Inf	0.0936648	2	2	RNA-dependent ATPase activity		73	GO:0072529	0.00312568	Inf	0.111888	2	2	pyrimidine-containing compound catabolic process
74	GO:0004126	0.00219074	Inf	0.0936648	2	2	cytidine deaminase activity		74	GO:0046087	0.00312568	Inf	0.111888	2	2	cytidine metabolic process
75	GO:0030975	0.00219074	Inf	0.0936648	2	2	thiamine binding		75	GO:0032481	0.00312568	Inf	0.111888	2	2	positive regulation of type I interferon production
76	GO:0005326	0.00232092	4.34563	1.8733	7	40	neurotransmitter transporter activity		76	GO:0032479	0.00312568	Inf	0.111888	2	2	regulation of type I interferon production
77	GO:0005328	0.00232092	4.34563	1.8733	7	40	neurotransmitter:sodium symporter activity		77	GO:0042454	0.00312568	Inf	0.111888	2	2	ribonucleoside catabolic process
78	GO:0015370	0.00232092	4.34563	1.8733	7	40	solute:sodium symporter activity		78	GO:0009972	0.00312568	Inf	0.111888	2	2	cytidine deamination
79	GO:0004499	0.00243161	9.08486	0.608822	4	13	N,N-dimethylaniline monooxygenase activity		79	GO:0034250	0.00312568	Inf	0.111888	2	2	positive regulation of cellular amide metabolic process
80	GO:0003824	0.00288444	1.22093	370.913	410	7920	catalytic activity		80	GO:0006021	0.00312568	Inf	0.111888	2	2	inositol biosynthetic process
81	GO:0033743	0.00310836	15.3166	0.327827	3	7	peptide-methionine (R)-S-oxide reductase activity		81	GO:0001816	0.00312568	Inf	0.111888	2	2	cytokine production
82	GO:0004386	0.00477043	1.7988	15.7825	27	337	helicase activity		82	GO:0001817	0.00312568	Inf	0.111888	2	2	regulation of cytokine production
83	GO:0098519	0.00483305	3.34564	2.66945	8	57	nucleotide phosphatase activity, acting on free nucleotides		83	GO:0001819	0.00312568	Inf	0.111888	2	2	positive regulation of cytokine production
84	GO:0051540	0.00572555	2.97598	3.3251	9	71	metal cluster binding		84	GO:0045727	0.00312568	Inf	0.111888	2	2	positive regulation of translation
85	GO:0051536	0.00572555	2.97598	3.3251	9	71	iron-sulfur cluster binding		85	GO:0042255	0.00312568	Inf	0.111888	2	2	ribosome assembly
86	GO:0016627	0.00577574	2.77185	3.93392	10	84	oxidoreductase activity, acting on the CH-CH group of donors		86	GO:0042256	0.00312568	Inf	0.111888	2	2	mature ribosome assembly
87	GO:0001671	0.0063675	40.8019	0.140497	2	3	ATPase activator activity		87	GO:0009164	0.00312568	Inf	0.111888	2	2	nucleoside catabolic process
88	GO:0004045	0.00695242	10.2099	0.421492	3	9	aminoacyl-tRNA hydrolase activity		88	GO:0002218	0.00312568	Inf	0.111888	2	2	activation of innate immune response
89	GO:0050662	0.00696828	1.63158	21.7771	34	465	coenzyme binding		89	GO:0046131	0.00312568	Inf	0.111888	2	2	pyrimidine ribonucleoside metabolic process
90	GO:0010181	0.00697101	6.28802	0.796151	4	17	FMN binding		90	GO:0046133	0.00312568	Inf	0.111888	2	2	pyrimidine ribonucleoside catabolic process
91	GO:0004222	0.00822818	2.12593	7.49319	15	160	metalloendopeptidase activity		91	GO:0046135	0.00312568	Inf	0.111888	2	2	pyrimidine nucleoside catabolic process
92	GO:0008061	0.00886071	1.84812	11.9423	21	255	chitin binding		92	GO:0006452	0.00312568	Inf	0.111888	2	2	translational frameshifting
93	GO:0015081	0.00929905	2.32333	5.52623	12	118	sodium ion transmembrane transporter activity		93	GO:0006449	0.00312568	Inf	0.111888	2	2	regulation of translational termination
94	GO:0031072	0.00958944	8.75078	0.468324	3	10	heat shock protein binding		94	GO:1901658	0.00312568	Inf	0.111888	2	2	glycosyl compound catabolic process
95	GO:0016667	0.00968566	2.71242	3.6061	9	77	oxidoreductase activity, acting on a sulfur group of donors		95	GO:0045089	0.00312568	Inf	0.111888	2	2	positive regulation of innate immune response
96	GO:0070035	0.0101913	3.61064	1.8733	6	40	purine NTP-dependent helicase activity		96	GO:0031349	0.00312568	Inf	0.111888	2	2	positive regulation of defense response
97	GO:0008026	0.0101913	3.61064	1.8733	6	40	ATP-dependent helicase activity		97	GO:0019752	0.00315463	1.72222	21.5385	35	385	carboxylic acid metabolic process
98	GO:0016709	0.01054	5.44896	0.889816	4	19	oxidoreductase activity, acting on paired donors, with incorporation or reduction of molecular oxygen, NAD(P)H as one donor, and incorporation of one atom of oxygen		98	GO:0046165	0.00325783	6.06155	1.06294	5	19	alcohol biosynthetic process
99	GO:0004788	0.0123399	20.3998	0.18733	2	4	thiamine diphosphokinase activity		99	GO:1901617	0.00325783	6.06155	1.06294	5	19	organic hydroxy compound biosynthetic process
100	GO:0008942	0.0123399	20.3998	0.18733	2	4	nitrite reductase [NAD(P)H] activity		100	GO:0006570	0.00335031	8.47859	0.671329	4	12	tyrosine metabolic process
101	GO:0071855	0.0123399	20.3998	0.18733	2	4	neuropeptide receptor binding		101	GO:0043545	0.00335031	8.47859	0.671329	4	12	molybdopterin cofactor metabolic process
102	GO:0071858	0.0123399	20.3998	0.18733	2	4	corazonin receptor binding		102	GO:0051240	0.00335031	8.47859	0.671329	4	12	positive regulation of multicellular organismal process
103	GO:0004375	0.0123399	20.3998	0.18733	2	4	glycine dehydrogenase (decarboxylating) activity		103	GO:0046173	0.00335031	8.47859	0.671329	4	12	polyol biosynthetic process
104	GO:0005135	0.0123399	20.3998	0.18733	2	4	interleukin-3 receptor binding		104	GO:0006418	0.00406218	2.52004	5.65035	13	101	tRNA aminoacylation for protein translation
105	GO:0046857	0.0123399	20.3998	0.18733	2	4	oxidoreductase activity, acting on other nitrogenous compounds as donors, with NAD or NADP as acceptor		105	GO:0043570	0.00514989	12.7045	0.391608	3	7	maintenance of DNA repeat elements
106	GO:0016642	0.0123399	20.3998	0.18733	2	4	oxidoreductase activity, acting on the CH-NH2 group of donors, disulfide as acceptor		106	GO:0043571	0.00514989	12.7045	0.391608	3	7	maintenance of CRISPR repeat elements
107	GO:0042623	0.0134635	2.05314	7.21219	14	154	ATPase activity, coupled		107	GO:0051189	0.00619478	6.78177	0.783217	4	14	prosthetic group metabolic process
108	GO:0016747	0.0136491	1.89894	9.41332	17	201	transferase activity, transferring acyl groups other than amino-acyl groups		108	GO:0006415	0.00619478	6.78177	0.783217	4	14	translational termination
109	GO:0004383	0.0137344	3.93175	1.45181	5	31	guanylate cyclase activity		109	GO:0071704	0.00636925	1.22007	429.538	462	7678	organic substance metabolic process
110	GO:0016814	0.015114	4.80734	0.983481	4	21	hydrolase activity, acting on carbon-nitrogen (but not peptide) bonds, in cyclic amidines		110	GO:0006576	0.0064874	2.94471	3.41259	9	61	cellular biogenic amine metabolic process
111	GO:0019842	0.0163912	2.32892	4.58958	10	98	vitamin binding		111	GO:0044106	0.0064874	2.94471	3.41259	9	61	cellular amine metabolic process
112	GO:0019904	0.0163932	6.80535	0.561989	3	12	protein domain specific binding		112	GO:0043038	0.0066429	2.35803	5.98601	13	107	amino acid activation
113	GO:0005212	0.0163932	6.80535	0.561989	3	12	structural constituent of eye lens		113	GO:0043039	0.0066429	2.35803	5.98601	13	107	tRNA aminoacylation
114	GO:0022857	0.0174652	1.30354	66.0337	83	1410	transmembrane transporter activity		114	GO:0090407	0.00701644	1.79238	14.7692	25	264	organophosphate biosynthetic process
115	GO:0003896	0.0178035	4.53999	1.03031	4	22	DNA primase activity		115	GO:0044262	0.00722291	2.88892	3.46853	9	62	cellular carbohydrate metabolic process
116	GO:0016746	0.0193649	1.70054	12.8789	21	275	transferase activity, transferring acyl groups		116	GO:0006836	0.0081009	3.39806	2.34965	7	42	neurotransmitter transport
117	GO:0015035	0.0196521	3.06795	2.15429	6	46	protein disulfide oxidoreductase activity		117	GO:0009308	0.00888339	2.78341	3.58042	9	64	amine metabolic process
118	GO:0015036	0.0196521	3.06795	2.15429	6	46	disulfide oxidoreductase activity		118	GO:0006432	0.00902822	33.8402	0.167832	2	3	phenylalanyl-tRNA aminoacylation
119	GO:0004497	0.0196521	3.06795	2.15429	6	46	monooxygenase activity		119	GO:1901565	0.0113439	2.50225	4.36364	10	78	organonitrogen compound catabolic process
120	GO:0008977	0.019931	13.599	0.234162	2	5	prephenate dehydrogenase (NAD+) activity		120	GO:0008643	0.0117952	3.12902	2.51748	7	45	carbohydrate transport
121	GO:0098809	0.019931	13.599	0.234162	2	5	nitrite reductase activity		121	GO:0044272	0.0133338	4.03873	1.45455	5	26	sulfur compound biosynthetic process
122	GO:0003839	0.019931	13.599	0.234162	2	5	gamma-glutamylcyclotransferase activity		122	GO:0044057	0.0173879	16.9187	0.223776	2	4	regulation of system process
123	GO:0004665	0.019931	13.599	0.234162	2	5	prephenate dehydrogenase (NADP+) activity		123	GO:0060047	0.0173879	16.9187	0.223776	2	4	heart contraction
124	GO:0016661	0.019931	13.599	0.234162	2	5	oxidoreductase activity, acting on other nitrogenous compounds as donors		124	GO:0006568	0.0173879	16.9187	0.223776	2	4	tryptophan metabolic process
125	GO:0004019	0.019931	13.599	0.234162	2	5	adenylosuccinate synthase activity		125	GO:0009071	0.0173879	16.9187	0.223776	2	4	serine family amino acid catabolic process
126	GO:0032403	0.0201105	1.94123	7.58685	14	162	protein complex binding		126	GO:0006586	0.0173879	16.9187	0.223776	2	4	indolalkylamine metabolic process
127	GO:0070279	0.0205204	2.51969	3.41877	8	73	vitamin B6 binding		127	GO:0006544	0.0173879	16.9187	0.223776	2	4	glycine metabolic process
128	GO:0030170	0.0205204	2.51969	3.41877	8	73	pyridoxal phosphate binding		128	GO:0006546	0.0173879	16.9187	0.223776	2	4	glycine catabolic process
129	GO:0016671	0.0205816	6.12445	0.608822	3	13	oxidoreductase activity, acting on a sulfur group of donors, disulfide as acceptor		129	GO:0042357	0.0173879	16.9187	0.223776	2	4	thiamine diphosphate metabolic process
130	GO:0004520	0.0225226	3.40671	1.63913	5	35	endodeoxyribonuclease activity		130	GO:0008015	0.0173879	16.9187	0.223776	2	4	blood circulation
131	GO:0015666	0.0253005	5.56735	0.655654	3	14	restriction endodeoxyribonuclease activity		131	GO:0008016	0.0173879	16.9187	0.223776	2	4	regulation of heart contraction
132	GO:0009036	0.0253005	5.56735	0.655654	3	14	Type II site-specific deoxyribonuclease activity		132	GO:0042430	0.0173879	16.9187	0.223776	2	4	indole-containing compound metabolic process
133	GO:0016810	0.0253245	2.60396	2.90361	7	62	hydrolase activity, acting on carbon-nitrogen (but not peptide) bonds		133	GO:1901269	0.0173879	16.9187	0.223776	2	4	lipooligosaccharide metabolic process
134	GO:0003724	0.0253682	1.87723	7.82101	14	167	RNA helicase activity		134	GO:1901271	0.0173879	16.9187	0.223776	2	4	lipooligosaccharide biosynthetic process
135	GO:0016714	0.0289764	10.1987	0.280995	2	6	oxidoreductase activity, acting on paired donors, with incorporation or reduction of molecular oxygen, reduced pteridine as one donor, and incorporation of one atom of oxygen		135	GO:0045823	0.0173879	16.9187	0.223776	2	4	positive regulation of heart contraction
136	GO:0001664	0.0289764	10.1987	0.280995	2	6	G-protein coupled receptor binding		136	GO:0046493	0.0173879	16.9187	0.223776	2	4	lipid A metabolic process
137	GO:0003747	0.0289764	10.1987	0.280995	2	6	translation release factor activity		137	GO:0003013	0.0173879	16.9187	0.223776	2	4	circulatory system process
138	GO:0008376	0.0289764	10.1987	0.280995	2	6	acetylgalactosaminyltransferase activity		138	GO:0003015	0.0173879	16.9187	0.223776	2	4	heart process
139	GO:0008079	0.0289764	10.1987	0.280995	2	6	translation termination factor activity		139	GO:1903522	0.0173879	16.9187	0.223776	2	4	regulation of blood circulation
140	GO:0009975	0.0310719	3.09645	1.77963	5	38	cyclase activity		140	GO:1903524	0.0173879	16.9187	0.223776	2	4	positive regulation of blood circulation
141	GO:0008527	0.0355547	3.55198	1.26448	4	27	taste receptor activity		141	GO:0009229	0.0173879	16.9187	0.223776	2	4	thiamine diphosphate biosynthetic process
142	GO:0016829	0.0359479	1.6774	10.5373	17	225	lyase activity		142	GO:0009245	0.0173879	16.9187	0.223776	2	4	lipid A biosynthetic process
143	GO:0016884	0.0363216	4.71028	0.749319	3	16	carbon-nitrogen ligase activity, with glutamine as amido-N-donor		143	GO:0006448	0.0173879	16.9187	0.223776	2	4	regulation of translational elongation
144	GO:0016888	0.0363216	4.71028	0.749319	3	16	endodeoxyribonuclease activity, producing 5'-phosphomonoesters		144	GO:0045088	0.0173879	16.9187	0.223776	2	4	regulation of innate immune response
145	GO:0008047	0.0378857	2.21205	3.84026	8	82	enzyme activator activity		145	GO:0031347	0.0173879	16.9187	0.223776	2	4	regulation of defense response
146	GO:0004371	0.0393236	8.15844	0.327827	2	7	glycerone kinase activity		146	GO:0006304	0.0181746	3.68693	1.56643	5	28	DNA modification
147	GO:0004411	0.0393236	8.15844	0.327827	2	7	homogentisate 1,2-dioxygenase activity		147	GO:1901606	0.0192084	4.51934	1.06294	4	19	alpha-amino acid catabolic process
148	GO:0016638	0.0399948	3.40378	1.31131	4	28	oxidoreductase activity, acting on the CH-NH2 group of donors		148	GO:0006790	0.0204344	2.76406	2.7972	7	50	sulfur compound metabolic process
149	GO:0016849	0.04527	2.76104	1.96696	5	42	phosphorus-oxygen lyase activity		149	GO:0009063	0.0229739	4.23653	1.11888	4	20	cellular amino acid catabolic process
150	GO:0051745	0.0468324	Inf	0.0468324	1	1	4-hydroxy-3-methylbut-2-en-1-yl diphosphate reductase activity		150	GO:0051239	0.0240498	3.39142	1.67832	5	30	regulation of multicellular organismal process
151	GO:0016726	0.0468324	Inf	0.0468324	1	1	oxidoreductase activity, acting on CH or CH2 groups, NAD or NADP as acceptor		151	GO:0055085	0.0254252	1.2874	64.6154	80	1155	transmembrane transport
152	GO:0004668	0.0468324	Inf	0.0468324	1	1	protein-arginine deiminase activity		152	GO:0009166	0.0262486	5.64414	0.671329	3	12	nucleotide catabolic process
153	GO:0004424	0.0468324	Inf	0.0468324	1	1	imidazoleglycerol-phosphate dehydratase activity		153	GO:0046068	0.0273964	3.26072	1.73427	5	31	cGMP metabolic process
154	GO:0047487	0.0468324	Inf	0.0468324	1	1	oligogalacturonide lyase activity		154	GO:0006182	0.0273964	3.26072	1.73427	5	31	cGMP biosynthetic process
155	GO:0008097	0.0468324	Inf	0.0468324	1	1	5S rRNA binding		155	GO:0043171	0.0279122	11.2782	0.27972	2	5	peptide catabolic process
156	GO:0008168	0.0473713	1.6145	10.912	17	233	methyltransferase activity		156	GO:0044038	0.0279122	11.2782	0.27972	2	5	cell wall macromolecule biosynthetic process
157	GO:0015103	0.0493337	2.68822	2.01379	5	43	inorganic anion transmembrane transporter activity		157	GO:0019073	0.0279122	11.2782	0.27972	2	5	viral DNA genome packaging
									158	GO:0006751	0.0279122	11.2782	0.27972	2	5	glutathione catabolic process
									159	GO:0002684	0.0279122	11.2782	0.27972	2	5	positive regulation of immune system process
									160	GO:0009095	0.0279122	11.2782	0.27972	2	5	aromatic amino acid family biosynthetic process, prephenate pathway
									161	GO:0006571	0.0279122	11.2782	0.27972	2	5	tyrosine biosynthetic process
									162	GO:0006020	0.0279122	11.2782	0.27972	2	5	inositol metabolic process
									163	GO:0050778	0.0279122	11.2782	0.27972	2	5	positive regulation of immune response
									164	GO:0002253	0.0279122	11.2782	0.27972	2	5	activation of immune response
									165	GO:0070589	0.0279122	11.2782	0.27972	2	5	cellular component macromolecule biosynthetic process
									166	GO:0044355	0.032735	5.07931	0.727273	3	13	clearance of foreign intracellular DNA
									167	GO:0099046	0.032735	5.07931	0.727273	3	13	clearance of foreign intracellular nucleic acids
									168	GO:0009307	0.032735	5.07931	0.727273	3	13	DNA restriction-modification system
									169	GO:0044712	0.0346597	1.96858	5.93007	11	106	single-organism catabolic process
									170	GO:0051052	0.0368039	3.56673	1.28671	4	23	regulation of DNA metabolic process
									171	GO:0043241	0.0368039	3.56673	1.28671	4	23	protein complex disassembly
									172	GO:0043624	0.0368039	3.56673	1.28671	4	23	cellular protein complex disassembly
									173	GO:0006396	0.0390278	1.34409	36.1958	47	647	RNA processing
									174	GO:2001021	0.0403333	8.45799	0.335664	2	6	negative regulation of response to DNA damage stimulus
									175	GO:2001032	0.0403333	8.45799	0.335664	2	6	regulation of double-strand break repair via nonhomologous end joining
									176	GO:2001033	0.0403333	8.45799	0.335664	2	6	negative regulation of double-strand break repair via nonhomologous end joining
									177	GO:0008612	0.0403333	8.45799	0.335664	2	6	peptidyl-lysine modification to peptidyl-hypusine
									178	GO:0044273	0.0403333	8.45799	0.335664	2	6	sulfur compound catabolic process
									179	GO:0045738	0.0403333	8.45799	0.335664	2	6	negative regulation of DNA repair
									180	GO:0042219	0.0403333	8.45799	0.335664	2	6	cellular modified amino acid catabolic process
									181	GO:2000780	0.0403333	8.45799	0.335664	2	6	negative regulation of double-strand break repair
									182	GO:2000779	0.0403333	8.45799	0.335664	2	6	regulation of double-strand break repair
									183	GO:0006869	0.0412428	1.90785	6.0979	11	109	lipid transport
									184	GO:0015698	0.0420605	2.32895	3.24476	7	58	inorganic anion transport
									185	GO:0032984	0.0422753	3.38812	1.34266	4	24	macromolecular complex disassembly
									186	GO:0044238	0.0431923	1.14495	403.189	426	7207	primary metabolic process
									187	GO:0009405	0.0436172	1.88842	6.15385	11	110	pathogenesis
									188	GO:0010876	0.0486441	1.85073	6.26573	11	112	lipid localization
Cluster 9 Molecular function (MF)									Cluster 9 Biological process (BP)									Cluster 9 Cellular components (CC)
	GOMFID	Pvalue	OddsRatio	ExpCount	Count	Size	Term			GOBPID	Pvalue	OddsRatio	ExpCount	Count	Size	Term			GOCCID	Pvalue	OddsRatio	ExpCount	Count	Size	Term
1	GO:0042302	2.78e-51	12.7874	9.17916	79	385	structural constituent of cuticle		1	GO:1901071	3.95e-18	7.01787	6.82202	38	265	glucosamine-containing compound metabolic process		1	GO:0005576	3.93e-23	6.35266	14.4553	60	738	extracellular region
2	GO:0005198	6.95e-37	5.66366	24.7003	103	1036	structural molecule activity		2	GO:0006030	3.95e-18	7.01787	6.82202	38	265	chitin metabolic process		2	GO:0019031	7.14e-10	6.18417	4.13289	21	211	viral envelope
3	GO:0008061	1.12e-19	7.78346	6.0797	38	255	chitin binding		3	GO:0006040	6.66e-18	6.89414	6.925	38	269	amino sugar metabolic process		3	GO:0036338	9.27e-10	6.08581	4.19165	21	214	viral membrane
4	GO:0008233	5.07e-13	2.65357	38.314	86	1607	peptidase activity		4	GO:0006022	1.35e-17	6.52327	7.46561	39	290	aminoglycan metabolic process		4	GO:0005744	4.33e-08	51.882	0.235046	6	12	mitochondrial inner membrane presequence translocase complex
5	GO:0070011	6.79e-13	2.66655	37.1458	84	1558	peptidase activity, acting on L-amino acid peptides		5	GO:1901135	1.09e-11	3.3833	17.3769	50	675	carbohydrate derivative metabolic process		5	GO:0016469	9.73e-08	5.25054	4.03495	18	206	proton-transporting two-sector ATPase complex
6	GO:0004175	1.12e-12	2.87066	28.8249	71	1209	endopeptidase activity		6	GO:0006508	1.52e-10	2.43736	40.4173	82	1570	proteolysis		6	GO:0019028	1.68e-07	4.37617	5.62151	21	287	viral capsid
7	GO:0017171	1.9e-10	2.85245	22.3161	56	936	serine hydrolase activity		7	GO:0034220	3.35e-08	3.82566	8.00622	27	311	ion transmembrane transport		7	GO:0098796	4.42e-07	3.2614	10.4791	29	535	membrane protein complex
8	GO:0008236	1.9e-10	2.85245	22.3161	56	936	serine-type peptidase activity		8	GO:0006818	1.41e-07	4.17307	5.97249	22	232	hydrogen transport		8	GO:0031012	2.13e-06	11.3167	0.881422	8	45	extracellular matrix
9	GO:0004252	5.62e-09	2.78666	19.2881	48	809	serine-type endopeptidase activity		9	GO:1902600	1.41e-07	4.17307	5.97249	22	232	hydrogen ion transmembrane transport		9	GO:0019012	6.53e-06	3.30403	7.6194	22	389	virion
10	GO:0004222	2.86e-07	5.03047	3.81471	17	160	metalloendopeptidase activity		10	GO:0015992	1.41e-07	4.17307	5.97249	22	232	proton transport		10	GO:0033178	8.85e-06	9.0927	1.05771	8	54	proton-transporting two-sector ATPase complex, catalytic domain
11	GO:0016820	9.13e-07	6.1395	2.43188	13	102	hydrolase activity, acting on acid anhydrides, catalyzing transmembrane movement of substances		11	GO:0010207	4.1e-07	33.0117	0.334665	6	13	photosystem II assembly		11	GO:0044423	1.16e-05	3.27185	7.30601	21	373	virion part
12	GO:0043492	9.13e-07	6.1395	2.43188	13	102	ATPase activity, coupled to movement of substances		12	GO:0098660	1.12e-06	3.417	7.82602	24	304	inorganic ion transmembrane transport		12	GO:0033176	2.73e-05	4.75205	2.85972	12	146	proton-transporting V-type ATPase complex
13	GO:0042626	9.13e-07	6.1395	2.43188	13	102	ATPase activity, coupled to transmembrane movement of substances		13	GO:0098662	1.12e-06	3.417	7.82602	24	304	inorganic cation transmembrane transport		13	GO:0033180	0.00025263	7.75062	0.901009	6	46	proton-transporting V-type ATPase, V1 domain
14	GO:0015405	1.77e-06	5.74972	2.57493	13	108	P-P-bond-hydrolysis-driven transmembrane transporter activity		14	GO:0098655	1.12e-06	3.417	7.82602	24	304	cation transmembrane transport		14	GO:0044421	0.00030966	3.59956	3.68238	12	188	extracellular region part
15	GO:0015399	1.77e-06	5.74972	2.57493	13	108	primary active transmembrane transporter activity		15	GO:0015988	1.43e-06	4.73095	3.83578	16	149	energy coupled proton transmembrane transport, against electrochemical gradient		15	GO:0098800	0.00038161	4.47776	2.23293	9	114	inner mitochondrial membrane protein complex
16	GO:0008237	2.49e-06	3.55316	6.48501	21	272	metallopeptidase activity		16	GO:0099131	1.43e-06	4.73095	3.83578	16	149	ATP hydrolysis coupled ion transmembrane transport		16	GO:0033177	0.00066733	3.76667	2.91848	10	149	proton-transporting two-sector ATPase complex, proton-transporting domain
17	GO:0046961	2.58e-06	20.7536	0.429155	6	18	proton-transporting ATPase activity, rotational mechanism		17	GO:0099132	1.43e-06	4.73095	3.83578	16	149	ATP hydrolysis coupled cation transmembrane transport		17	GO:0044425	0.00146356	1.62646	55.2357	74	2820	membrane part
18	GO:0036442	2.58e-06	20.7536	0.429155	6	18	hydrogen-exporting ATPase activity		18	GO:0090662	1.43e-06	4.73095	3.83578	16	149	ATP hydrolysis coupled transmembrane transport		18	GO:0098798	0.00175736	3.5502	2.76179	9	141	mitochondrial protein complex
19	GO:0015078	7.5e-06	3.69294	5.3406	18	224	hydrogen ion transmembrane transporter activity		19	GO:0015991	1.43e-06	4.73095	3.83578	16	149	ATP hydrolysis coupled proton transport		19	GO:0005743	0.00233996	3.39337	2.87931	9	147	mitochondrial inner membrane
20	GO:0044769	7.87e-05	9.9542	0.739101	6	31	ATPase activity, coupled to transmembrane movement of ions, rotational mechanism		20	GO:0030150	1.79e-06	23.1027	0.411896	6	16	protein import into mitochondrial matrix		20	GO:0044455	0.00268396	3.31996	2.93807	9	150	mitochondrial membrane part
21	GO:0042623	8.34e-05	3.86351	3.67166	13	154	ATPase activity, coupled		21	GO:0006626	1.79e-06	23.1027	0.411896	6	16	protein targeting to mitochondrion		21	GO:0019866	0.00268396	3.31996	2.93807	9	150	organelle inner membrane
22	GO:0022804	9.96e-05	3.3871	4.79223	15	201	active transmembrane transporter activity		22	GO:0055085	2.51e-06	2.11474	29.7337	56	1155	transmembrane transport		22	GO:0005774	0.00749465	5.67348	0.783486	4	40	vacuolar membrane
23	GO:0016757	0.00016146	2.96773	6.15123	17	258	transferase activity, transferring glycosyl groups		23	GO:0072655	3.98e-06	19.2492	0.463383	6	18	establishment of protein localization to mitochondrion		23	GO:0016471	0.00749465	5.67348	0.783486	4	40	vacuolar proton-transporting V-type ATPase complex
24	GO:0016758	0.00019261	3.33464	4.52997	14	190	transferase activity, transferring hexosyl groups		24	GO:0019684	3.98e-06	19.2492	0.463383	6	18	photosynthesis, light reaction		24	GO:0044437	0.00749465	5.67348	0.783486	4	40	vacuolar part
25	GO:0022853	0.00025628	7.77355	0.905995	6	38	active ion transmembrane transporter activity		25	GO:0070585	3.98e-06	19.2492	0.463383	6	18	protein localization to mitochondrion		25	GO:0031966	0.00986214	2.52087	4.23082	10	216	mitochondrial membrane
26	GO:0019829	0.00025628	7.77355	0.905995	6	38	cation-transporting ATPase activity		26	GO:1990542	7.95e-06	16.4967	0.51487	6	20	mitochondrial transmembrane transport		26	GO:0005890	0.00988165	16.8747	0.156697	2	8	sodium:potassium-exchanging ATPase complex
27	GO:0042625	0.00025628	7.77355	0.905995	6	38	ATPase coupled ion transmembrane transporter activity		27	GO:0044765	1.35e-05	2.24536	19.6165	40	762	single-organism transport		27	GO:0090533	0.00988165	16.8747	0.156697	2	8	cation-transporting ATPase complex
28	GO:0005200	0.00039374	9.40526	0.643733	5	27	structural constituent of cytoskeleton		28	GO:0044743	1.47e-05	14.4324	0.566357	6	22	protein transmembrane import into intracellular organelle		28	GO:0005773	0.011332	4.9786	0.881422	4	45	vacuole
29	GO:0008410	0.00056712	Inf	0.0476839	2	2	CoA-transferase activity		29	GO:0009617	1.69e-05	10.3851	0.849535	7	33	response to bacterium		29	GO:1904949	0.0125426	14.4623	0.176284	2	9	ATPase complex
30	GO:0034257	0.00056712	Inf	0.0476839	2	2	nicotinamide riboside transmembrane transporter activity		30	GO:0042742	1.69e-05	10.3851	0.849535	7	33	defense response to bacterium		30	GO:0098533	0.0125426	14.4623	0.176284	2	9	ATPase dependent transmembrane transport complex
31	GO:0004040	0.00056712	Inf	0.0476839	2	2	amidase activity		31	GO:1902578	2.19e-05	2.19374	20.0284	40	778	single-organism localization		31	GO:0005740	0.0132619	2.40121	4.42669	10	226	mitochondrial envelope
32	GO:0030515	0.00068923	24.7353	0.190736	3	8	snoRNA binding		32	GO:0006839	2.53e-05	12.8267	0.617844	6	24	mitochondrial transport		32	GO:0005739	0.0169291	2.12377	5.99367	12	306	mitochondrion
33	GO:0016787	0.00116725	1.41097	95.9639	123	4025	hydrolase activity		33	GO:0043207	3.65e-05	4.58059	2.93476	12	114	response to external biotic stimulus		33	GO:0044429	0.0255594	2.14552	4.91637	10	251	mitochondrial part
34	GO:0005201	0.00192524	15.4568	0.262262	3	11	extracellular matrix structural constituent		34	GO:0051707	3.65e-05	4.58059	2.93476	12	114	response to other organism		34	GO:0031967	0.0274536	2.11836	4.97513	10	254	organelle envelope
35	GO:0008770	0.003296	41.134	0.0953679	2	4	[acyl-carrier-protein] phosphodiesterase activity		35	GO:0065002	4.14e-05	11.5422	0.669331	6	26	intracellular protein transmembrane transport		35	GO:0031090	0.0295613	1.84489	8.01114	14	409	organelle membrane
36	GO:0005540	0.003296	41.134	0.0953679	2	4	hyaluronic acid binding		36	GO:0007005	6.59e-05	4.28403	3.11496	12	121	mitochondrion organization		36	GO:0000793	0.0335635	2.62526	2.40922	6	123	condensed chromosome
37	GO:0016842	0.00540676	27.4211	0.11921	2	5	amidine-lyase activity		37	GO:0009607	7.14e-05	4.24475	3.14071	12	122	response to biotic stimulus		37	GO:0031975	0.0337376	2.04073	5.15142	10	263	envelope
38	GO:0004018	0.00540676	27.4211	0.11921	2	5	N6-(1,2-dicarboxyethyl)AMP AMP-lyase (fumarate-forming) activity		38	GO:0071806	9.8e-05	9.6155	0.772305	6	30	protein transmembrane transport		38	GO:0061617	0.0352601	4.47902	0.724724	3	37	MICOS complex
39	GO:0020037	0.00570723	2.08506	8.53542	17	358	heme binding		39	GO:0009605	0.00034152	3.32703	4.24768	13	165	response to external stimulus		39	GO:0005787	0.0382298	7.22511	0.313394	2	16	signal peptidase complex
40	GO:0015077	0.00573104	2.03622	9.25068	18	388	monovalent inorganic cation transmembrane transporter activity		40	GO:0015672	0.00052505	2.24674	11.4559	24	445	monovalent inorganic cation transport		40	GO:0048500	0.0382298	7.22511	0.313394	2	16	signal recognition particle
41	GO:0046906	0.00705985	2.0363	8.72616	17	366	tetrapyrrole binding		41	GO:0034258	0.0006608	Inf	0.051487	2	2	nicotinamide riboside transport		41	GO:0098573	0.0485648	3.90244	0.82266	3	42	intrinsic component of mitochondrial membrane
42	GO:0016705	0.0104187	1.99332	8.36853	16	351	oxidoreductase activity, acting on paired donors, with incorporation or reduction of molecular oxygen		42	GO:0009167	0.00066385	3.75653	2.90901	10	113	purine ribonucleoside monophosphate metabolic process		42	GO:0032592	0.0485648	3.90244	0.82266	3	42	integral component of mitochondrial membrane
43	GO:0050136	0.0124014	4.85351	0.905995	4	38	NADH dehydrogenase (quinone) activity		43	GO:0009126	0.00066385	3.75653	2.90901	10	113	purine nucleoside monophosphate metabolic process		43	GO:0031304	0.0485648	3.90244	0.82266	3	42	intrinsic component of mitochondrial inner membrane
44	GO:0008137	0.0124014	4.85351	0.905995	4	38	NADH dehydrogenase (ubiquinone) activity		44	GO:0009161	0.00081503	3.64935	2.98624	10	116	ribonucleoside monophosphate metabolic process		44	GO:0031305	0.0485648	3.90244	0.82266	3	42	integral component of mitochondrial inner membrane
45	GO:0003954	0.0135648	4.71456	0.929837	4	39	NADH dehydrogenase activity		45	GO:0009123	0.00093074	3.5812	3.03773	10	118	nucleoside monophosphate metabolic process
46	GO:0008519	0.0144372	13.7081	0.190736	2	8	ammonium transmembrane transporter activity		46	GO:1901564	0.00111626	1.65201	34.7022	53	1348	organonitrogen compound metabolic process
47	GO:0016903	0.017065	3.56003	1.50204	5	63	oxidoreductase activity, acting on the aldehyde or oxo group of donors		47	GO:0098542	0.0013068	4.11107	2.13671	8	83	defense response to other organism
48	GO:0022857	0.0184682	1.4276	33.6172	46	1410	transmembrane transporter activity		48	GO:0030682	0.00150781	9.56344	0.51487	4	20	evasion or tolerance of host defense response
49	GO:0016655	0.0219926	4.02322	1.07289	4	45	oxidoreductase activity, acting on NAD(P)H, quinone or similar compound as acceptor		49	GO:0051807	0.00150781	9.56344	0.51487	4	20	evasion or tolerance of defense response of other organism involved in symbiotic interaction
50	GO:0016811	0.0233011	5.3716	0.619891	3	26	hydrolase activity, acting on carbon-nitrogen (but not peptide) bonds, in linear amides		50	GO:0015979	0.00153083	5.35873	1.26143	6	49	photosynthesis
51	GO:0015035	0.0236475	3.9272	1.09673	4	46	protein disulfide oxidoreductase activity		51	GO:0007127	0.0021007	4.27337	1.80204	7	70	meiosis I
52	GO:0015036	0.0236475	3.9272	1.09673	4	46	disulfide oxidoreductase activity		52	GO:0052200	0.00218601	8.4995	0.566357	4	22	response to host defenses
53	GO:0046556	0.023842	Inf	0.023842	1	1	alpha-L-arabinofuranosidase activity		53	GO:0044413	0.00218601	8.4995	0.566357	4	22	avoidance of host defenses
54	GO:0019239	0.0257613	5.14748	0.643733	3	27	deaminase activity		54	GO:0044415	0.00218601	8.4995	0.566357	4	22	evasion or tolerance of host defenses
55	GO:0005506	0.0264668	1.77165	9.34605	16	392	iron ion binding		55	GO:0051832	0.00218601	8.4995	0.566357	4	22	avoidance of defenses of other organism involved in symbiotic interaction
56	GO:0016744	0.0270522	9.13716	0.262262	2	11	transferase activity, transferring aldehyde or ketonic groups		56	GO:0051834	0.00218601	8.4995	0.566357	4	22	evasion or tolerance of defenses of other organism involved in symbiotic interaction
57	GO:0008661	0.0270522	9.13716	0.262262	2	11	1-deoxy-D-xylulose-5-phosphate synthase activity		57	GO:0075136	0.00218601	8.4995	0.566357	4	22	response to host
58	GO:0016624	0.0319582	8.22297	0.286104	2	12	oxidoreductase activity, acting on the aldehyde or oxo group of donors, disulfide as acceptor		58	GO:0052173	0.00218601	8.4995	0.566357	4	22	response to defenses of other organism involved in symbiotic interaction
59	GO:0005215	0.0329544	1.35912	36.6928	48	1539	transporter activity		59	GO:0007131	0.00253945	4.79863	1.39015	6	54	reciprocal meiotic recombination
60	GO:0016491	0.0335736	1.3851	31.4475	42	1319	oxidoreductase activity		60	GO:0035825	0.00253945	4.79863	1.39015	6	54	reciprocal DNA recombination
61	GO:0004488	0.0339426	4.57474	0.715259	3	30	methylenetetrahydrofolate dehydrogenase (NADP+) activity		61	GO:0007126	0.00267431	4.07816	1.87927	7	73	meiotic nuclear division
62	GO:0030976	0.0371832	7.47499	0.309945	2	13	thiamine pyrophosphate binding		62	GO:1903046	0.00267431	4.07816	1.87927	7	73	meiotic cell cycle process
63	GO:0033764	0.0382117	2.52854	2.47956	6	104	steroid dehydrogenase activity, acting on the CH-OH group of donors, NAD or NADP as acceptor		63	GO:0006952	0.00333877	2.96994	3.60409	10	140	defense response
64	GO:0016229	0.0382117	2.52854	2.47956	6	104	steroid dehydrogenase activity		64	GO:0051321	0.00479504	3.63497	2.08522	7	81	meiotic cell cycle
65	GO:0003854	0.0382117	2.52854	2.47956	6	104	3-beta-hydroxy-delta5-steroid dehydrogenase activity		65	GO:0046034	0.00506505	3.24043	2.65158	8	103	ATP metabolic process
66	GO:0015666	0.0427092	6.85167	0.333787	2	14	restriction endodeoxyribonuclease activity		66	GO:0009199	0.00568405	3.17311	2.70307	8	105	ribonucleoside triphosphate metabolic process
67	GO:0015108	0.0427092	6.85167	0.333787	2	14	chloride transmembrane transporter activity		67	GO:0009144	0.00568405	3.17311	2.70307	8	105	purine nucleoside triphosphate metabolic process
68	GO:0008308	0.0427092	6.85167	0.333787	2	14	voltage-gated anion channel activity		68	GO:0009205	0.00568405	3.17311	2.70307	8	105	purine ribonucleoside triphosphate metabolic process
69	GO:0030151	0.0427092	6.85167	0.333787	2	14	molybdenum ion binding		69	GO:0009141	0.00709324	3.04648	2.80604	8	109	nucleoside triphosphate metabolic process
70	GO:0005253	0.0427092	6.85167	0.333787	2	14	anion channel activity		70	GO:0006812	0.0101301	1.65926	18.3808	29	714	cation transport
71	GO:0005254	0.0427092	6.85167	0.333787	2	14	chloride channel activity		71	GO:0009150	0.0108028	2.46982	4.27342	10	166	purine ribonucleotide metabolic process
72	GO:0009036	0.0427092	6.85167	0.333787	2	14	Type II site-specific deoxyribonuclease activity		72	GO:0034622	0.0114836	1.89413	9.96273	18	387	cellular macromolecular complex assembly
73	GO:0005247	0.0427092	6.85167	0.333787	2	14	voltage-gated chloride channel activity		73	GO:0009259	0.0121466	2.42264	4.35065	10	169	ribonucleotide metabolic process
74	GO:0008324	0.0457463	1.50357	15.7595	23	661	cation transmembrane transporter activity		74	GO:0019693	0.013613	2.37721	4.42788	10	172	ribose phosphate metabolic process
75	GO:0004197	0.0467953	3.11012	1.35899	4	57	cysteine-type endopeptidase activity		75	GO:0006811	0.0141554	1.51719	26.3613	38	1024	ion transport
76	GO:0022890	0.0468983	1.52963	14.1383	21	593	inorganic cation transmembrane transporter activity		76	GO:0006163	0.0152083	2.33343	4.50511	10	175	purine nucleotide metabolic process
77	GO:0015198	0.0471168	41.0382	0.0476839	1	2	oligopeptide transporter activity		77	GO:0006091	0.0154716	2.62652	3.21794	8	125	generation of precursor metabolites and energy
78	GO:0035673	0.0471168	41.0382	0.0476839	1	2	oligopeptide transmembrane transporter activity		78	GO:0072521	0.0163467	2.30511	4.5566	10	177	purine-containing compound metabolic process
79	GO:0005310	0.0471168	41.0382	0.0476839	1	2	dicarboxylic acid transmembrane transporter activity		79	GO:0046040	0.0166964	12.6847	0.205948	2	8	IMP metabolic process
80	GO:0071916	0.0471168	41.0382	0.0476839	1	2	dipeptide transmembrane transporter activity		80	GO:0015696	0.0166964	12.6847	0.205948	2	8	ammonium transport
81	GO:0072349	0.0471168	41.0382	0.0476839	1	2	modified amino acid transmembrane transporter activity		81	GO:0006188	0.0166964	12.6847	0.205948	2	8	IMP biosynthetic process
82	GO:0042936	0.0471168	41.0382	0.0476839	1	2	dipeptide transporter activity		82	GO:0006323	0.0168785	2.58196	3.26942	8	127	DNA packaging
83	GO:0015563	0.0471168	41.0382	0.0476839	1	2	uptake transmembrane transporter activity		83	GO:0030261	0.022932	5.44621	0.617844	3	24	chromosome condensation
84	GO:0015569	0.0471168	41.0382	0.0476839	1	2	p-aminobenzoyl-glutamate transmembrane transporter activity		84	GO:0031221	0.0257435	Inf	0.0257435	1	1	arabinan metabolic process
85	GO:0015558	0.0471168	41.0382	0.0476839	1	2	p-aminobenzoyl-glutamate uptake transmembrane transporter activity		85	GO:0044702	0.0267027	2.53118	2.90901	7	113	single organism reproductive process
									86	GO:0007007	0.0313263	4.76431	0.695074	3	27	inner mitochondrial membrane organization
									87	GO:0042407	0.0313263	4.76431	0.695074	3	27	cristae formation
									88	GO:0001522	0.034435	4.57337	0.720818	3	28	pseudouridine synthesis
									89	GO:0043623	0.0358304	1.82088	7.41412	13	288	cellular protein complex assembly
									90	GO:0046854	0.0367787	7.60841	0.308922	2	12	phosphatidylinositol phosphorylation
									91	GO:0046834	0.0367787	7.60841	0.308922	2	12	lipid phosphorylation
									92	GO:0007006	0.0376973	4.39713	0.746561	3	29	mitochondrial membrane organization
									93	GO:0071103	0.0388796	2.17529	3.83578	8	149	DNA conformation change
									94	GO:0044355	0.0427401	6.91619	0.334665	2	13	clearance of foreign intracellular DNA
									95	GO:0099046	0.0427401	6.91619	0.334665	2	13	clearance of foreign intracellular nucleic acids
									96	GO:0009307	0.0427401	6.91619	0.334665	2	13	DNA restriction-modification system
									97	GO:1902582	0.0460738	2.41555	2.60009	6	101	single-organism intracellular transport
									98	GO:0006119	0.0490327	6.33934	0.360409	2	14	oxidative phosphorylation
									99	GO:0042773	0.0490327	6.33934	0.360409	2	14	ATP synthesis coupled electron transport
									100	GO:0000280	0.0491355	2.19642	3.32091	7	129	nuclear division
Cluster 10 Molecular function (MF)									Cluster 10 Biological process (BP)									Cluster 10 Cellular component (CC)
	GOMFID	Pvalue	OddsRatio	ExpCount	Count	Size	Term			GOBPID	Pvalue	OddsRatio	ExpCount	Count	Size	Term			GOCCID	Pvalue	OddsRatio	ExpCount	Count	Size	Term
1	GO:0003824	9.74e-63	4.03401	306.621	517	7920	catalytic activity		1	GO:0006508	6.87e-31	3.2744	71.1827	173	1570	proteolysis		1	GO:0005576	3.99e-28	7.00524	15.7537	69	738	extracellular region
2	GO:0070011	1.41e-47	4.28837	60.3177	187	1558	peptidase activity, acting on L-amino acid peptides		2	GO:0008152	1.88e-30	3.8499	418.572	531	9232	metabolic process		2	GO:0019028	1.09e-05	3.51259	6.12644	19	287	viral capsid
3	GO:0008233	8.34e-47	4.19487	62.2147	189	1607	peptidase activity		3	GO:0055114	1.41e-23	3.02937	58.805	140	1297	oxidation-reduction process		3	GO:0005777	4.97e-05	10.9065	0.683087	6	32	peroxisome
4	GO:0017171	8.09e-46	5.23679	36.2371	140	936	serine hydrolase activity		4	GO:0006040	1.29e-21	5.8651	12.1963	55	269	amino sugar metabolic process		4	GO:0042579	4.97e-05	10.9065	0.683087	6	32	microbody
5	GO:0008236	8.09e-46	5.23679	36.2371	140	936	serine-type peptidase activity		5	GO:0006022	9.66e-21	5.46259	13.1484	56	290	aminoglycan metabolic process		5	GO:0070161	0.00012354	20.8115	0.277504	4	13	anchoring junction
6	GO:0004252	3.73e-33	4.57737	31.3203	112	809	serine-type endopeptidase activity		6	GO:1901071	2.1e-20	5.68482	12.0149	53	265	glucosamine-containing compound metabolic process		6	GO:0005924	0.00012354	20.8115	0.277504	4	13	cell-substrate adherens junction
7	GO:0016491	1.42e-29	3.48596	51.0648	141	1319	oxidoreductase activity		7	GO:0006030	2.1e-20	5.68482	12.0149	53	265	chitin metabolic process		7	GO:0005925	0.00012354	20.8115	0.277504	4	13	focal adhesion
8	GO:0016787	3.48e-28	2.48455	155.827	282	4025	hydrolase activity		8	GO:0044710	3.11e-10	1.83904	109.313	170	2411	single-organism metabolic process		8	GO:0005912	0.00012354	20.8115	0.277504	4	13	adherens junction
9	GO:0046906	6.06e-27	6.0611	14.1696	67	366	tetrapyrrole binding		9	GO:0005975	8.84e-09	2.72945	20.312	49	448	carbohydrate metabolic process		9	GO:0030054	0.00012354	20.8115	0.277504	4	13	cell junction
10	GO:0005506	1.14e-26	5.78871	15.1762	69	392	iron ion binding		10	GO:0032787	7.12e-08	4.45821	5.84877	22	129	monocarboxylic acid metabolic process		10	GO:0030055	0.00012354	20.8115	0.277504	4	13	cell-substrate junction
11	GO:0016705	1.86e-26	6.13231	13.5889	65	351	oxidoreductase activity, acting on paired donors, with incorporation or reduction of molecular oxygen		11	GO:1901135	1.7e-07	2.21778	30.604	61	675	carbohydrate derivative metabolic process		11	GO:0044423	0.00012961	2.79474	7.96223	20	373	virion part
12	GO:0004175	2.48e-26	3.38833	46.8062	128	1209	endopeptidase activity		12	GO:0009062	2.19e-07	63.8065	0.362714	6	8	fatty acid catabolic process		12	GO:0019031	0.0001615	3.44628	4.50411	14	211	viral envelope
13	GO:0020037	5.97e-26	5.98329	13.8599	65	358	heme binding		13	GO:0019395	2.19e-07	63.8065	0.362714	6	8	fatty acid oxidation		13	GO:0036338	0.00018729	3.39333	4.56814	14	214	viral membrane
14	GO:0008061	3.36e-24	6.97946	9.87228	53	255	chitin binding		14	GO:0034440	2.19e-07	63.8065	0.362714	6	8	lipid oxidation		14	GO:0019012	0.00022765	2.66821	8.30378	20	389	virion
15	GO:0008237	6.01e-16	5.05324	10.5304	44	272	metallopeptidase activity		15	GO:0006635	2.19e-07	63.8065	0.362714	6	8	fatty acid beta-oxidation		15	GO:0042151	0.00045322	Inf	0.0426929	2	2	nematocyst
16	GO:0004180	2.36e-09	8.27848	2.51646	16	65	carboxypeptidase activity		16	GO:0072329	2.19e-07	63.8065	0.362714	6	8	monocarboxylic acid catabolic process		16	GO:0009289	0.0043438	30.8926	0.106732	2	5	pilus
17	GO:0004181	5.1e-09	9.57105	1.97446	14	51	metallocarboxypeptidase activity		17	GO:0006631	2.99e-07	4.91706	4.39791	18	97	fatty acid metabolic process		17	GO:0000445	0.0109304	7.34343	0.469622	3	22	THO complex part of transcription export complex
18	GO:0008235	5.1e-09	9.57105	1.97446	14	51	metalloexopeptidase activity		18	GO:0044242	6.33e-07	42.5342	0.408053	6	9	cellular lipid catabolic process		18	GO:0000346	0.0109304	7.34343	0.469622	3	22	transcription export complex
19	GO:0008238	7.83e-08	4.79622	4.87807	20	126	exopeptidase activity		19	GO:0019538	1.49e-05	1.48355	140.144	184	3091	protein metabolic process		19	GO:0000347	0.0139255	6.64246	0.512315	3	24	THO complex
20	GO:0003997	8.63e-08	75.142	0.309718	6	8	acyl-CoA oxidase activity		20	GO:0016054	2.36e-05	8.5244	1.2695	8	28	organic acid catabolic process		20	GO:0070449	0.014782	13.2333	0.192118	2	9	elongin complex
21	GO:0016627	1.17e-07	5.95866	3.25204	16	84	oxidoreductase activity, acting on the CH-CH group of donors		21	GO:0046395	2.36e-05	8.5244	1.2695	8	28	carboxylic acid catabolic process		21	GO:0001401	0.0302871	8.41717	0.277504	2	13	mitochondrial sorting and assembly machinery complex
22	GO:0016634	6.06e-07	37.5666	0.387148	6	10	oxidoreductase activity, acting on the CH-CH group of donors, oxygen as acceptor		22	GO:0044282	8.64e-05	6.81677	1.4962	8	33	small molecule catabolic process
23	GO:0004553	2.12e-06	3.78771	5.96208	20	154	hydrolase activity, hydrolyzing O-glycosyl compounds		23	GO:0043436	0.00010091	2.13143	17.773	35	392	oxoacid metabolic process
24	GO:0050660	4.68e-06	3.57261	6.2718	20	162	flavin adenine dinucleotide binding		24	GO:0006082	0.00011734	2.11314	17.909	35	395	organic acid metabolic process
25	GO:0016899	1.08e-05	99.8997	0.193574	4	5	oxidoreductase activity, acting on the CH-OH group of donors, oxygen as acceptor		25	GO:0006525	0.00013122	28.2594	0.317375	4	7	arginine metabolic process
26	GO:0003885	1.08e-05	99.8997	0.193574	4	5	D-arabinono-1,4-lactone oxidase activity		26	GO:0019752	0.00015614	2.10318	17.4556	34	385	carboxylic acid metabolic process
27	GO:0048037	1.46e-05	2.14539	21.6029	43	558	cofactor binding		27	GO:0006563	0.00043913	16.9529	0.408053	4	9	L-serine metabolic process
28	GO:0050662	2.9e-05	2.21228	18.0024	37	465	coenzyme binding		28	GO:0009070	0.00043913	16.9529	0.408053	4	9	serine family amino acid biosynthetic process
29	GO:0016747	3.63e-05	2.95709	7.78168	21	201	transferase activity, transferring acyl groups other than amino-acyl groups		29	GO:0006534	0.00043913	16.9529	0.408053	4	9	cysteine metabolic process
30	GO:0016798	4.28e-05	3.01503	7.27838	20	188	hydrolase activity, acting on glycosyl bonds		30	GO:0006535	0.00043913	16.9529	0.408053	4	9	cysteine biosynthetic process from serine
31	GO:0016746	7.13e-05	2.53942	10.6466	25	275	transferase activity, transferring acyl groups		31	GO:0019344	0.00043913	16.9529	0.408053	4	9	cysteine biosynthetic process
32	GO:0009001	0.00024013	19.9752	0.348433	4	9	serine O-acetyltransferase activity		32	GO:0000097	0.00043913	16.9529	0.408053	4	9	sulfur amino acid biosynthetic process
33	GO:0016412	0.00024013	19.9752	0.348433	4	9	serine O-acyltransferase activity		33	GO:0030258	0.00071622	6.70728	1.13348	6	25	lipid modification
34	GO:0003857	0.00053567	4.8905	1.89703	8	49	3-hydroxyacyl-CoA dehydrogenase activity		34	GO:0006527	0.00205232	Inf	0.0906785	2	2	arginine catabolic process
35	GO:0016413	0.00059104	14.2663	0.425863	4	11	O-acetyltransferase activity		35	GO:0019385	0.00205232	Inf	0.0906785	2	2	methanogenesis, from acetate
36	GO:0008241	0.00059104	14.2663	0.425863	4	11	peptidyl-dipeptidase activity		36	GO:0006097	0.00205232	Inf	0.0906785	2	2	glyoxylate cycle
37	GO:0008791	0.00149672	Inf	0.0774296	2	2	arginine N-succinyltransferase activity		37	GO:0046487	0.00205232	Inf	0.0906785	2	2	glyoxylate metabolic process
38	GO:0004474	0.00149672	Inf	0.0774296	2	2	malate synthase activity		38	GO:0009069	0.00215484	9.41524	0.589411	4	13	serine family amino acid metabolic process
39	GO:0016289	0.0028657	5.94816	1.00658	5	26	CoA hydrolase activity		39	GO:0007172	0.00215484	9.41524	0.589411	4	13	signal complex assembly
40	GO:0016790	0.0028657	5.94816	1.00658	5	26	thiolester hydrolase activity		40	GO:0000096	0.00290957	8.47304	0.63475	4	14	sulfur amino acid metabolic process
41	GO:0003860	0.0028657	5.94816	1.00658	5	26	3-hydroxyisobutyryl-CoA hydrolase activity		41	GO:0006869	0.00382164	2.63818	4.94198	12	109	lipid transport
42	GO:0004312	0.00542427	6.65447	0.735581	4	19	fatty acid synthase activity		42	GO:0010876	0.00476653	2.55841	5.078	12	112	lipid localization
43	GO:0004315	0.00542427	6.65447	0.735581	4	19	3-oxoacyl-[acyl-carrier-protein] synthase activity		43	GO:0016042	0.00873199	3.74365	1.81357	6	40	lipid catabolic process
44	GO:0016769	0.00755183	9.34794	0.425863	3	11	transferase activity, transferring nitrogenous groups		44	GO:0016053	0.0115575	2.47334	4.35257	10	96	organic acid biosynthetic process
45	GO:0008483	0.00755183	9.34794	0.425863	3	11	transaminase activity		45	GO:0046394	0.0115575	2.47334	4.35257	10	96	carboxylic acid biosynthetic process
46	GO:0004866	0.00833539	2.98809	2.90361	8	75	endopeptidase inhibitor activity		46	GO:0009065	0.0115845	21.1241	0.181357	2	4	glutamine family amino acid catabolic process
47	GO:0061135	0.00833539	2.98809	2.90361	8	75	endopeptidase regulator activity		47	GO:0006526	0.0115845	21.1241	0.181357	2	4	arginine biosynthetic process
48	GO:0016748	0.00852477	24.9	0.154859	2	4	succinyltransferase activity		48	GO:0006050	0.0115845	21.1241	0.181357	2	4	mannosamine metabolic process
49	GO:0016749	0.00852477	24.9	0.154859	2	4	N-succinyltransferase activity		49	GO:0006051	0.0115845	21.1241	0.181357	2	4	N-acetylmannosamine metabolic process
50	GO:0047465	0.00852477	24.9	0.154859	2	4	N-acylglucosamine-6-phosphate 2-epimerase activity		50	GO:0006083	0.0115845	21.1241	0.181357	2	4	acetate metabolic process
51	GO:0004055	0.00852477	24.9	0.154859	2	4	argininosuccinate synthase activity		51	GO:0009306	0.0123744	3.43928	1.94959	6	43	protein secretion
52	GO:0016879	0.012304	3.40707	1.93574	6	50	ligase activity, forming carbon-nitrogen bonds		52	GO:0002790	0.0123744	3.43928	1.94959	6	43	peptide secretion
53	GO:0019842	0.0136546	2.5311	3.79405	9	98	vitamin binding		53	GO:1901607	0.0187319	3.10274	2.13095	6	47	alpha-amino acid biosynthetic process
54	GO:0008745	0.0152806	6.7973	0.542007	3	14	N-acetylmuramoyl-L-alanine amidase activity		54	GO:0007009	0.0188696	6.34395	0.589411	3	13	plasma membrane organization
55	GO:0030414	0.0193483	2.5324	3.36819	8	87	peptidase inhibitor activity		55	GO:0044406	0.0188696	6.34395	0.589411	3	13	adhesion of symbiont to host
56	GO:0061134	0.0193483	2.5324	3.36819	8	87	peptidase regulator activity		56	GO:1901605	0.0199234	2.53495	3.40045	8	75	alpha-amino acid metabolic process
57	GO:0090729	0.0202378	12.4485	0.232289	2	6	toxin activity		57	GO:0009064	0.0215826	4.23311	1.08814	4	24	glutamine family amino acid metabolic process
58	GO:0031683	0.020588	2.50059	3.4069	8	88	G-protein beta/gamma-subunit complex binding		58	GO:0044712	0.02191	2.2139	4.80596	10	106	single-organism catabolic process
59	GO:0016407	0.0217836	4.15683	1.08401	4	28	acetyltransferase activity		59	GO:0006081	0.0272587	10.5604	0.272036	2	6	cellular aldehyde metabolic process
60	GO:0004222	0.0218542	2.03138	6.19437	12	160	metalloendopeptidase activity		60	GO:0044272	0.0282862	3.84766	1.17882	4	26	sulfur compound biosynthetic process
61	GO:0016884	0.0221993	5.75088	0.619437	3	16	carbon-nitrogen ligase activity, with glutamine as amido-N-donor		61	GO:0008652	0.0294187	2.76437	2.35764	6	52	cellular amino acid biosynthetic process
62	GO:0004129	0.0245167	3.99032	1.12273	4	29	cytochrome-c oxidase activity		62	GO:0000270	0.0334133	4.87878	0.725428	3	16	peptidoglycan metabolic process
63	GO:0016675	0.0245167	3.99032	1.12273	4	29	oxidoreductase activity, acting on a heme group of donors		63	GO:0006027	0.0334133	4.87878	0.725428	3	16	glycosaminoglycan catabolic process
64	GO:0016676	0.0245167	3.99032	1.12273	4	29	oxidoreductase activity, acting on a heme group of donors, oxygen as acceptor		64	GO:0009253	0.0334133	4.87878	0.725428	3	16	peptidoglycan catabolic process
65	GO:0015002	0.0274476	3.83662	1.16144	4	30	heme-copper terminal oxidase activity		65	GO:0006613	0.0354577	2.12272	4.48859	9	99	cotranslational protein targeting to membrane
66	GO:0008318	0.0276133	9.95824	0.271004	2	7	protein prenyltransferase activity		66	GO:0006614	0.0354577	2.12272	4.48859	9	99	SRP-dependent cotranslational protein targeting to membrane
67	GO:0004611	0.0276133	9.95824	0.271004	2	7	phosphoenolpyruvate carboxykinase activity		67	GO:0097354	0.0370302	8.44762	0.317375	2	7	prenylation
68	GO:0004713	0.0339114	3.56216	1.23887	4	32	protein tyrosine kinase activity		68	GO:0018342	0.0370302	8.44762	0.317375	2	7	protein prenylation
69	GO:0008374	0.0339114	3.56216	1.23887	4	32	O-acyltransferase activity		69	GO:0072599	0.0439672	2.03173	4.66995	9	103	establishment of protein localization to endoplasmic reticulum
70	GO:0031419	0.0358857	8.29804	0.309718	2	8	cobalamin binding		70	GO:0045047	0.0439672	2.03173	4.66995	9	103	protein targeting to ER
71	GO:0008519	0.0358857	8.29804	0.309718	2	8	ammonium transmembrane transporter activity		71	GO:0001906	0.0453393	Inf	0.0453393	1	1	cell killing
72	GO:0046912	0.0358857	8.29804	0.309718	2	8	transferase activity, transferring acyl groups, acyl groups converted into alkyl on transfer		72	GO:0015803	0.0453393	Inf	0.0453393	1	1	branched-chain amino acid transport
73	GO:0015658	0.0387148	Inf	0.0387148	1	1	branched-chain amino acid transmembrane transporter activity		73	GO:0031341	0.0453393	Inf	0.0453393	1	1	regulation of cell killing
74	GO:0015643	0.0387148	Inf	0.0387148	1	1	toxic substance binding		74	GO:0031342	0.0453393	Inf	0.0453393	1	1	negative regulation of cell killing
75	GO:0015171	0.0387148	Inf	0.0387148	1	1	amino acid transmembrane transporter activity		75	GO:1901564	0.0461567	1.25501	61.1173	74	1348	organonitrogen compound metabolic process
76	GO:0003964	0.0387148	Inf	0.0387148	1	1	RNA-directed DNA polymerase activity		76	GO:0006013	0.0479148	7.03912	0.362714	2	8	mannose metabolic process
77	GO:0004096	0.0387148	Inf	0.0387148	1	1	catalase activity		77	GO:0015696	0.0479148	7.03912	0.362714	2	8	ammonium transport
78	GO:0031543	0.0449748	7.11218	0.348433	2	9	peptidyl-proline dioxygenase activity		78	GO:0006633	0.0499195	3.13386	1.40552	4	31	fatty acid biosynthetic process
79	GO:0031545	0.0449748	7.11218	0.348433	2	9	peptidyl-proline 4-dioxygenase activity
80	GO:0008948	0.0449748	7.11218	0.348433	2	9	oxaloacetate decarboxylase activity
81	GO:0019798	0.0449748	7.11218	0.348433	2	9	procollagen-proline dioxygenase activity
82	GO:0004656	0.0449748	7.11218	0.348433	2	9	procollagen-proline 4-dioxygenase activity
83	GO:0016614	0.0450243	1.65014	10.0271	16	259	oxidoreductase activity, acting on CH-OH group of donors
Cluster 11 Molecular function (MF)									Cluster 11 Biological process (BP)									Cluster 11 Cellular component (CC)
	GOMFID	Pvalue	OddsRatio	ExpCount	Count	Size	Term			GOBPID	Pvalue	OddsRatio	ExpCount	Count	Size	Term			GOCCID	Pvalue	OddsRatio	ExpCount	Count	Size	Term
1	GO:0004252	1.5e-21	4.45854	19.5637	71	809	serine-type endopeptidase activity		1	GO:0006508	7.12e-13	2.66944	40.6586	88	1570	proteolysis		1	GO:0009341	0.00423531	26.4528	0.101337	2	8	beta-galactosidase complex
2	GO:0017171	5.08e-18	3.77457	22.6349	71	936	serine hydrolase activity		2	GO:0006633	5.74e-08	15.7824	0.802813	9	31	fatty acid biosynthetic process		2	GO:0005576	0.00498405	2.13833	9.34835	18	738	extracellular region
3	GO:0008236	5.08e-18	3.77457	22.6349	71	936	serine-type peptidase activity		3	GO:0055114	2.72e-07	2.17568	33.5886	64	1297	oxidation-reduction process		3	GO:0001772	0.00669506	19.8349	0.126671	2	10	immunological synapse
4	GO:0004175	2.9e-16	3.23567	29.2367	79	1209	endopeptidase activity		4	GO:0008610	6.07e-07	3.55005	7.56198	24	292	lipid biosynthetic process		4	GO:0097197	0.00669506	19.8349	0.126671	2	10	tetraspanin-enriched microdomain
5	GO:0008233	2.6e-15	2.84994	38.8614	92	1607	peptidase activity		5	GO:0072330	1.22e-06	10.2025	1.11358	9	43	monocarboxylic acid biosynthetic process		5	GO:0005840	0.00884859	2.58227	4.18015	10	330	ribosome
6	GO:0070011	3.3e-15	2.8687	37.6764	90	1558	peptidase activity, acting on L-amino acid peptides		6	GO:0006631	1.23e-06	6.0147	2.51203	13	97	fatty acid metabolic process		6	GO:0070161	0.011321	14.4202	0.164673	2	13	anchoring junction
7	GO:0003824	1.64e-13	2.07128	191.526	266	7920	catalytic activity		7	GO:0019538	2.78e-06	1.73494	80.0482	117	3091	protein metabolic process		7	GO:0005924	0.011321	14.4202	0.164673	2	13	cell-substrate adherens junction
8	GO:0016787	3.22e-12	2.07375	97.3348	160	4025	hydrolase activity		8	GO:0008152	2.19e-05	1.73549	239.083	272	9232	metabolic process		8	GO:0005925	0.011321	14.4202	0.164673	2	13	focal adhesion
9	GO:0004312	1.94e-10	37.0791	0.459469	9	19	fatty acid synthase activity		9	GO:0032787	2.95e-05	4.3444	3.34074	13	129	monocarboxylic acid metabolic process		9	GO:0005912	0.011321	14.4202	0.164673	2	13	adherens junction
10	GO:0004315	1.94e-10	37.0791	0.459469	9	19	3-oxoacyl-[acyl-carrier-protein] synthase activity		10	GO:0016053	3.69e-05	4.99823	2.48613	11	96	organic acid biosynthetic process		10	GO:0030054	0.011321	14.4202	0.164673	2	13	cell junction
11	GO:0004553	6.12e-09	5.89762	3.72411	19	154	hydrolase activity, hydrolyzing O-glycosyl compounds		11	GO:0046394	3.69e-05	4.99823	2.48613	11	96	carboxylic acid biosynthetic process		11	GO:0030055	0.011321	14.4202	0.164673	2	13	cell-substrate junction
12	GO:0016798	1.58e-07	4.70173	4.54632	19	188	hydrolase activity, acting on glycosyl bonds		12	GO:0006629	4.01e-05	2.37301	14.2434	31	550	lipid metabolic process		12	GO:0000408	0.014991	12.1988	0.190007	2	15	EKC/KEOPS complex
13	GO:0042302	2.43e-07	3.31717	9.31029	28	385	structural constituent of cuticle		13	GO:0005975	0.00010662	2.42761	11.6019	26	448	carbohydrate metabolic process		13	GO:0016021	0.020186	1.55076	29.8311	40	2355	integral component of membrane
14	GO:0050662	3.75e-07	3.03002	11.2449	31	465	coenzyme binding		14	GO:0006694	0.00012932	4.28664	2.84869	11	110	steroid biosynthetic process		14	GO:0031224	0.0210295	1.54523	29.9071	40	2361	intrinsic component of membrane
15	GO:0048037	8.13e-07	2.75863	13.4939	34	558	cofactor binding		15	GO:0008202	0.00015203	4.20109	2.90048	11	112	steroid metabolic process		15	GO:0030529	0.0213883	2.06719	6.23223	12	492	intracellular ribonucleoprotein complex
16	GO:0016491	1.32e-05	1.94962	31.8968	57	1319	oxidoreductase activity		16	GO:0051704	0.00019137	2.15956	15.5124	31	599	multi-organism process		16	GO:1990904	0.0223105	2.05357	6.27023	12	495	ribonucleoprotein complex
17	GO:0005198	2.45e-05	2.03144	25.0531	47	1036	structural molecule activity		17	GO:0044255	0.00048288	2.6955	6.78506	17	262	cellular lipid metabolic process		17	GO:0042600	0.0424087	6.59906	0.329346	2	26	chorion
18	GO:0050660	4.04e-05	3.91282	3.91757	14	162	flavin adenine dinucleotide binding		18	GO:0044710	0.00079045	1.5254	62.4381	86	2411	single-organism metabolic process		18	GO:0044279	0.0454307	6.33434	0.342013	2	27	other organism membrane
19	GO:0033764	4.31e-05	4.87283	2.51499	11	104	steroid dehydrogenase activity, acting on the CH-OH group of donors, NAD or NADP as acceptor		19	GO:0044283	0.00086962	2.98729	4.68739	13	181	small molecule biosynthetic process		19	GO:0044218	0.0454307	6.33434	0.342013	2	27	other organism cell membrane
20	GO:0016229	4.31e-05	4.87283	2.51499	11	104	steroid dehydrogenase activity		20	GO:0044419	0.00089913	2.11837	12.6119	25	487	interspecies interaction between organisms		20	GO:0033644	0.0454307	6.33434	0.342013	2	27	host cell membrane
21	GO:0003854	4.31e-05	4.87283	2.51499	11	104	3-beta-hydroxy-delta5-steroid dehydrogenase activity		21	GO:0039694	0.00197174	75.6716	0.0776915	2	3	viral RNA genome replication
22	GO:0016614	6.32e-05	3.1027	6.26328	18	259	oxidoreductase activity, acting on CH-OH group of donors		22	GO:0039703	0.00197174	75.6716	0.0776915	2	3	RNA replication
23	GO:0016620	0.0001645	6.821	1.18495	7	49	oxidoreductase activity, acting on the aldehyde or oxo group of donors, NAD or NADP as acceptor		23	GO:0009405	0.00220475	3.41629	2.84869	9	110	pathogenesis
24	GO:0046332	0.00020273	18.0948	0.314373	4	13	SMAD binding		24	GO:0019752	0.00251342	2.128	9.97041	20	385	carboxylic acid metabolic process
25	GO:0004181	0.00021269	6.5102	1.23331	7	51	metallocarboxypeptidase activity		25	GO:0043436	0.00308776	2.08677	10.1517	20	392	oxoacid metabolic process
26	GO:0008235	0.00021269	6.5102	1.23331	7	51	metalloexopeptidase activity		26	GO:0006082	0.00336559	2.06957	10.2294	20	395	organic acid metabolic process
27	GO:0016747	0.00039623	3.08969	4.86069	14	201	transferase activity, transferring acyl groups other than amino-acyl groups		27	GO:0044010	0.00387593	37.8328	0.103589	2	4	single-species biofilm formation
28	GO:0004781	0.00058346	Inf	0.0483651	2	2	sulfate adenylyltransferase (ATP) activity		28	GO:1900190	0.00387593	37.8328	0.103589	2	4	regulation of single-species biofilm formation
29	GO:0004779	0.00058346	Inf	0.0483651	2	2	sulfate adenylyltransferase activity		29	GO:1900192	0.00387593	37.8328	0.103589	2	4	positive regulation of single-species biofilm formation
30	GO:0008851	0.00058346	Inf	0.0483651	2	2	ethanolamine ammonia-lyase activity		30	GO:0043902	0.00387593	37.8328	0.103589	2	4	positive regulation of multi-organism process
31	GO:0004560	0.00058346	Inf	0.0483651	2	2	alpha-L-fucosidase activity		31	GO:1901565	0.00401738	3.7659	2.01998	7	78	organonitrogen compound catabolic process
32	GO:0016841	0.00058346	Inf	0.0483651	2	2	ammonia-lyase activity		32	GO:0044711	0.00412818	1.76779	17.9726	30	694	single-organism biosynthetic process
33	GO:0015928	0.00058346	Inf	0.0483651	2	2	fucosidase activity		33	GO:0019076	0.00420877	6.90909	0.673327	4	26	viral release from host cell
34	GO:0004609	0.00058346	Inf	0.0483651	2	2	phosphatidylserine decarboxylase activity		34	GO:0035890	0.00420877	6.90909	0.673327	4	26	exit from host
35	GO:0016903	0.00079284	5.11158	1.5235	7	63	oxidoreductase activity, acting on the aldehyde or oxo group of donors		35	GO:0035891	0.00420877	6.90909	0.673327	4	26	exit from host cell
36	GO:0004180	0.00095728	4.93474	1.57187	7	65	carboxypeptidase activity		36	GO:0042440	0.00553496	6.33233	0.725121	4	28	pigment metabolic process
37	GO:0016746	0.00112602	2.55105	6.6502	16	275	transferase activity, transferring acyl groups		37	GO:0043666	0.00634948	25.2199	0.129486	2	5	regulation of phosphoprotein phosphatase activity
38	GO:0046992	0.00172228	81.0802	0.0725477	2	3	oxidoreductase activity, acting on X-H and Y-H to form an X-Y bond		38	GO:0010921	0.00634948	25.2199	0.129486	2	5	regulation of phosphatase activity
39	GO:0050485	0.00172228	81.0802	0.0725477	2	3	oxidoreductase activity, acting on X-H and Y-H to form an X-Y bond, with a disulfide as acceptor		39	GO:0006778	0.00896526	5.426	0.82871	4	32	porphyrin-containing compound metabolic process
40	GO:0051287	0.00188959	3.01108	3.89339	11	161	NAD binding		40	GO:0044764	0.0102124	1.91943	9.84093	18	380	multi-organism cellular process
41	GO:0004325	0.00338939	40.5377	0.0967303	2	4	ferrochelatase activity		41	GO:0019058	0.0110254	2.24618	5.61969	12	217	viral life cycle
42	GO:0043022	0.00709652	5.80975	0.773842	4	32	ribosome binding		42	GO:0006026	0.0122877	4.89974	0.906401	4	35	aminoglycan catabolic process
43	GO:0008384	0.00820504	20.2665	0.145095	2	6	IkappaB kinase activity		43	GO:0052192	0.0122877	4.89974	0.906401	4	35	movement in environment of other organism involved in symbiotic interaction
44	GO:0050151	0.00820504	20.2665	0.145095	2	6	oleate hydratase activity		44	GO:0052126	0.0122877	4.89974	0.906401	4	35	movement in host environment
45	GO:0052689	0.0101665	3.49388	1.83787	6	76	carboxylic ester hydrolase activity		45	GO:0006783	0.0168862	12.607	0.207177	2	8	heme biosynthetic process
46	GO:0016616	0.01066	2.34661	4.90906	11	203	oxidoreductase activity, acting on the CH-OH group of donors, NAD or NADP as acceptor		46	GO:0035303	0.0168862	12.607	0.207177	2	8	regulation of dephosphorylation
47	GO:0003968	0.0135128	6.76596	0.507834	3	21	RNA-directed 5'-3' RNA polymerase activity		47	GO:0035304	0.0168862	12.607	0.207177	2	8	regulation of protein dephosphorylation
48	GO:0020037	0.014011	1.92246	8.65736	16	358	heme binding		48	GO:0006013	0.0168862	12.607	0.207177	2	8	mannose metabolic process
49	GO:0004864	0.0148328	13.5094	0.19346	2	8	protein phosphatase inhibitor activity		49	GO:0042710	0.0168862	12.607	0.207177	2	8	biofilm formation
50	GO:0019212	0.0148328	13.5094	0.19346	2	8	phosphatase inhibitor activity		50	GO:0051186	0.0174378	2.40485	3.93637	9	152	cofactor metabolic process
51	GO:0004565	0.0148328	13.5094	0.19346	2	8	beta-galactosidase activity		51	GO:0009888	0.0178115	4.3384	1.00999	4	39	tissue development
52	GO:0008200	0.0153708	6.40948	0.532016	3	22	ion channel inhibitor activity		52	GO:0071704	0.0231347	1.26397	198.839	217	7678	organic substance metabolic process
53	GO:0016248	0.0153708	6.40948	0.532016	3	22	channel inhibitor activity		53	GO:0018189	0.0258972	Inf	0.0258972	1	1	pyrroloquinoline quinone biosynthetic process
54	GO:0008237	0.0154625	2.05767	6.57766	13	272	metallopeptidase activity		54	GO:0018212	0.0258972	Inf	0.0258972	1	1	peptidyl-tyrosine modification
55	GO:0046906	0.016915	1.87763	8.85082	16	366	tetrapyrrole binding		55	GO:0072351	0.0258972	Inf	0.0258972	1	1	tricarboxylic acid biosynthetic process
56	GO:0004045	0.0187684	11.5788	0.217643	2	9	aminoacyl-tRNA hydrolase activity		56	GO:0120009	0.0262277	9.45373	0.258972	2	10	intermembrane lipid transfer
57	GO:0016247	0.0194975	5.79838	0.580381	3	24	channel regulator activity		57	GO:0042168	0.0262277	9.45373	0.258972	2	10	heme metabolic process
58	GO:0099106	0.0194975	5.79838	0.580381	3	24	ion channel regulator activity		58	GO:0051188	0.0263234	2.5396	2.90048	7	112	cofactor biosynthetic process
59	GO:0120013	0.0230893	10.1309	0.241826	2	10	intermembrane lipid transfer activity		59	GO:0019318	0.0307241	3.61333	1.19127	4	46	hexose metabolic process
60	GO:0042834	0.0241826	Inf	0.0241826	1	1	peptidoglycan binding		60	GO:0005996	0.0352061	3.44854	1.24306	4	48	monosaccharide metabolic process
61	GO:0043021	0.0247529	3.87001	1.1124	4	46	ribonucleoprotein complex binding		61	GO:0031163	0.0371818	7.56179	0.310766	2	12	metallo-sulfur cluster assembly
62	GO:0051540	0.0286087	3.08141	1.71696	5	71	metal cluster binding		62	GO:0016226	0.0371818	7.56179	0.310766	2	12	iron-sulfur cluster assembly
63	GO:0051536	0.0286087	3.08141	1.71696	5	71	iron-sulfur cluster binding		63	GO:0046149	0.0371818	7.56179	0.310766	2	12	pigment catabolic process
64	GO:0016836	0.029405	4.8695	0.677112	3	28	hydro-lyase activity		64	GO:0015996	0.0371818	7.56179	0.310766	2	12	chlorophyll catabolic process
65	GO:0070566	0.029405	4.8695	0.677112	3	28	adenylyltransferase activity		65	GO:0040011	0.0421883	2.03065	4.6097	9	178	locomotion
66	GO:0047746	0.0328046	8.10377	0.290191	2	12	chlorophyllase activity		66	GO:0007009	0.0432042	6.87381	0.336663	2	13	plasma membrane organization
67	GO:0015925	0.0328046	8.10377	0.290191	2	12	galactosidase activity		67	GO:0007172	0.0432042	6.87381	0.336663	2	13	signal complex assembly
68	GO:0008238	0.0334956	2.3966	3.047	7	126	exopeptidase activity		68	GO:0019835	0.0432042	6.87381	0.336663	2	13	cytolysis
69	GO:0005544	0.0381595	7.36664	0.314373	2	13	calcium-dependent phospholipid binding		69	GO:1901661	0.0453397	4.05731	0.802813	3	31	quinone metabolic process
70	GO:0008745	0.0438209	6.75236	0.338556	2	14	N-acetylmuramoyl-L-alanine amidase activity		70	GO:1901663	0.0453397	4.05731	0.802813	3	31	quinone biosynthetic process
71	GO:0004568	0.0438209	6.75236	0.338556	2	14	chitinase activity		71	GO:0044403	0.0455514	1.64861	10.0481	16	388	symbiosis, encompassing mutualism through parasitism
72	GO:0005184	0.0438209	6.75236	0.338556	2	14	neuropeptide hormone activity		72	GO:0044238	0.0490859	1.21135	186.641	202	7207	primary metabolic process
73	GO:0071949	0.0462658	3.12395	1.35422	4	56	FAD binding		73	GO:0006787	0.0495603	6.3005	0.362561	2	14	porphyrin-containing compound catabolic process
74	GO:0016211	0.0477817	40.4447	0.0483651	1	2	ammonia ligase activity		74	GO:0051187	0.0495603	6.3005	0.362561	2	14	cofactor catabolic process
75	GO:0004356	0.0477817	40.4447	0.0483651	1	2	glutamate-ammonia ligase activity		75	GO:0033015	0.0495603	6.3005	0.362561	2	14	tetrapyrrole catabolic process
76	GO:0016880	0.0477817	40.4447	0.0483651	1	2	acid-ammonia (or amide) ligase activity		76	GO:0072350	0.0495603	6.3005	0.362561	2	14	tricarboxylic acid metabolic process
									77	GO:0046148	0.0495603	6.3005	0.362561	2	14	pigment biosynthetic process
Cluster 12 Molecular function (MF)									Cluster 12 Biological process (BP)									Cluster 12 Cellular components (CC)
	GOMFID	Pvalue	OddsRatio	ExpCount	Count	Size	Term			GOBPID	Pvalue	OddsRatio	ExpCount	Count	Size	Term			GOCCID	Pvalue	OddsRatio	ExpCount	Count	Size	Term
1	GO:0042302	5.16e-58	12.2686	11.5614	93	385	structural constituent of cuticle		1	GO:0055114	4.49e-13	2.72844	37.2764	84	1297	oxidation-reduction process		1	GO:0016020	2.35e-10	2.52292	99.8349	144	4132	membrane
2	GO:0005198	9.18e-30	4.35355	31.1106	106	1036	structural molecule activity		2	GO:0006810	1.27e-07	1.86623	71.65	113	2493	transport		2	GO:0031012	9.82e-07	10.5127	1.08726	9	45	extracellular matrix
3	GO:0016491	7.73e-11	2.38661	39.6089	83	1319	oxidoreductase activity		3	GO:0051234	1.45e-07	1.86045	71.8225	113	2499	establishment of localization		3	GO:0015629	5.19e-06	5.72061	2.4403	12	101	actin cytoskeleton
4	GO:0016614	1.15e-09	4.2509	7.77765	29	259	oxidoreductase activity, acting on CH-OH group of donors		4	GO:0042060	1.56e-07	5.7193	3.27642	16	114	wound healing		4	GO:0016021	2.55e-05	1.83394	56.9001	84	2355	integral component of membrane
5	GO:0050662	2.45e-08	3.0196	13.9637	38	465	coenzyme binding		5	GO:0051179	1.7e-07	1.8427	74.5816	116	2595	localization		5	GO:0031224	2.82e-05	1.8273	57.045	84	2361	intrinsic component of membrane
6	GO:0048037	3.55e-07	2.61648	16.7565	40	558	cofactor binding		6	GO:0009611	1.76e-07	5.66108	3.30516	16	115	response to wounding		6	GO:0016459	2.99e-05	6.50779	1.61881	9	67	myosin complex
7	GO:0005215	4.09e-07	1.93812	46.2154	81	1539	transporter activity		7	GO:0044710	2.73e-07	1.84701	69.2933	109	2411	single-organism metabolic process		7	GO:0044425	0.000100039	1.72229	68.1351	94	2820	membrane part
8	GO:0016705	9.19e-07	3.01978	10.5404	29	351	oxidoreductase activity, acting on paired donors, with incorporation or reduction of molecular oxygen		8	GO:0006811	4.08e-07	2.21792	29.4303	58	1024	ion transport		8	GO:0044421	0.000176677	3.41367	4.54234	14	188	extracellular region part
9	GO:0004222	1.56e-06	4.20344	4.80472	18	160	metalloendopeptidase activity		9	GO:0055085	9.77e-07	2.09917	33.1953	62	1155	transmembrane transport		9	GO:0043292	0.000452873	30.7241	0.16913	3	7	contractile fiber
10	GO:0008237	2.58e-06	3.22689	8.16803	24	272	metallopeptidase activity		10	GO:0048589	1.26e-06	17.2003	0.60355	7	21	developmental growth		10	GO:0005861	0.000452873	30.7241	0.16913	3	7	troponin complex
11	GO:0033764	2.72e-06	5.13394	3.12307	14	104	steroid dehydrogenase activity, acting on the CH-OH group of donors, NAD or NADP as acceptor		11	GO:0031099	1.26e-06	17.2003	0.60355	7	21	regeneration		11	GO:0005865	0.000452873	30.7241	0.16913	3	7	striated muscle thin filament
12	GO:0016229	2.72e-06	5.13394	3.12307	14	104	steroid dehydrogenase activity		12	GO:0042246	1.26e-06	17.2003	0.60355	7	21	tissue regeneration		12	GO:0044449	0.000452873	30.7241	0.16913	3	7	contractile fiber part
13	GO:0003854	2.72e-06	5.13394	3.12307	14	104	3-beta-hydroxy-delta5-steroid dehydrogenase activity		13	GO:0006694	3.09e-06	5.08108	3.16145	14	110	steroid biosynthetic process		13	GO:0036379	0.000452873	30.7241	0.16913	3	7	myofilament
14	GO:0016616	3.35e-06	3.62953	6.09599	20	203	oxidoreductase activity, acting on the CH-OH group of donors, NAD or NADP as acceptor		14	GO:0008202	3.84e-06	4.97659	3.21893	14	112	steroid metabolic process		14	GO:0030016	0.000452873	30.7241	0.16913	3	7	myofibril
15	GO:0070011	4.66e-06	1.82379	46.786	78	1558	peptidase activity, acting on L-amino acid peptides		15	GO:0006629	8.84e-06	2.43056	15.8073	35	550	lipid metabolic process		15	GO:0030017	0.000452873	30.7241	0.16913	3	7	sarcomere
[truncated: 1,812 more rows]
